# Supplementary material
Source: PubMed Central journal article supplement (PMC4472447)

*Supplementary material for*

**Heterogeneous gene expression signatures correspond to distinct lung pathologies and biomarkers of disease severity in idiopathic pulmonary fibrosis**

Daryle J. DePianto<sup>1\*</sup>, Sanjay Chandriani<sup>1‡\*</sup>, Alexander R. Abbas<sup>1</sup>, Guiquan Jia<sup>1</sup>, Elsa N. N'Diaye<sup>1</sup>, Patrick Caplazi<sup>1</sup>, Steven E. Kauder<sup>1</sup>, Sabyasachi Biswas<sup>1</sup>, Satyajit K. Karnik<sup>1#</sup>, Connie Ha<sup>1</sup>, Zora Modrusan<sup>1</sup>, Michael A. Matthay<sup>2</sup>, Jasleen Kukreja<sup>3</sup>, Harold R. Collard<sup>2</sup>, Jackson G. Egen<sup>1</sup>, Paul J. Wolters<sup>2§</sup>, and Joseph R. Arron<sup>1§</sup>

<sup>1</sup>Genentech Research and Early Development, South San Francisco, CA

<sup>2</sup>Department of Medicine, University of California, San Francisco, CA

<sup>3</sup>Department of Surgery, University of California, San Francisco, CA

<sup>‡</sup>Current address: Novartis Institutes for Biomedical Research, Emeryville, CA.

<sup>\*</sup>DJD and SC contributed equally to this manuscript

<sup>§</sup>PJW and JRA co-directed this project

Address correspondence to  
Paul J. Wolters, MD  
University of California, San Francisco  
Department of Medicine  
Box 0111  
San Francisco, CA 94143-0111  
[paul.wolters@ucsf.edu](mailto:paul.wolters@ucsf.edu)

or

Joseph R. Arron, MD, PhD  
Genentech, Inc.  
MS 231C  
1 DNA Way  
South San Francisco, CA 94080  
[arron.joseph@gene.com](mailto:arron.joseph@gene.com)

**Supplementary Table 1. IPF lung tissue subject characteristics**

| <b>Variable</b>         | <b>(N=40)</b> |
|-------------------------|---------------|
| Age, years              | 60.6 (8.8)    |
| Male gender, N (%)      | 33 (83)       |
| VATS biopsy, Explant, N | 11, 29        |
| Ever smoked %           | 68            |
| FVC, % predicted        | 55.8 (17.2)   |
| TLC, % predicted        | 55.7 (16.2)   |
| DLCO, % predicted       | 34.1 (13.8)   |

Age, FVC, TLC, and DLCO are reported as mean (standard deviation).

Abbreviations: VATS, video assisted thoracoscopic biopsy; FVC, forced vital capacity; TLC, total lung capacity; DLCO, diffusion capacity of carbon monoxide. There were no current smokers in the cohort.

**Supplementary table 2. Genes in bronchiolar and lymphoid signatures used for qPCR validation of microarray signatures**

| <b>Gene</b> | <b>Signature</b> | <b>TaqMan assay ID</b> |
|-------------|------------------|------------------------|
| HPRT1       | Housekeeping     | Hs02800695_m1          |
| CCR6        | Lymphoid         | Hs01890706_s1          |
| CCR7        | Lymphoid         | Hs01013469_m1          |
| CD19        | Lymphoid         | Hs00174333_m1          |
| CXCL13      | Lymphoid         | Hs00757930_m1          |
| BMP7        | Bronchiolar      | Hs00233476_m1          |
| CLCA2       | Bronchiolar      | Hs00998916_m1          |
| CLU         | Bronchiolar      | Hs00156548_m1          |
| FGF14       | Bronchiolar      | Hs00738588_m1          |
| GSTA1       | Bronchiolar      | Hs00275575_m1          |
| HS3ST1      | Bronchiolar      | Hs00245421_s1          |
| IGFBP2      | Bronchiolar      | Hs01040719_m1          |
| KRT17       | Bronchiolar      | Hs01588578_m1          |
| MMP1        | Bronchiolar      | Hs00899658_m1          |
| MMP3        | Bronchiolar      | Hs00968305_m1          |
| KRT15       | Bronchiolar      | Hs00267035_m1          |
| MUCL1       | Bronchiolar      | Hs00536495_m1          |
| MUC20       | Bronchiolar      | Hs00416321_m1          |
| MUC4        | Bronchiolar      | Hs00366414_m1          |
| SERPINB4    | Bronchiolar      | Hs01691258_g1          |
| SERPINB3    | Bronchiolar      | Hs00199468_m1          |
| TFF3        | Bronchiolar      | Hs00902278_m1          |
| SIX1        | Bronchiolar      | Hs00195590_m1          |
| SPRR1B      | Bronchiolar      | Hs00234164_m1          |
| TP63        | Bronchiolar      | Hs00978343_m1          |

**Supplementary Table 3A. Differentially expressed genes in IPF vs. control lung tissue.**

Genes with a fold change (FC)  $\geq |1.5|$  and Benjamini-Hochberg adjusted p-value  $< 0.05$  in IPF (N=40) compared to control (N=8) bulk lung biopsies are listed.

| UPREGULATED in IPF vs. control |                                                                      |                  |                     |         |
|--------------------------------|----------------------------------------------------------------------|------------------|---------------------|---------|
| Gene Symbol                    | Gene Name                                                            | Agilent probe ID | Log <sub>2</sub> FC | q-value |
| IL13RA2                        | interleukin 13 receptor, alpha 2                                     | A_23_P85209      | 5.5                 | 5.5E-14 |
| MMP1                           | matrix metalloproteinase 1 (interstitial collagenase)                | A_23_P1691       | 5.3                 | 7.9E-07 |
| UBD                            | ubiquitin D                                                          | A_23_P81898      | 4.8                 | 8.1E-12 |
| GPR87                          | G protein-coupled receptor 87                                        | A_23_P121120     | 4.5                 | 2.2E-07 |
| SFRP2                          | secreted frizzled-related protein 2                                  | A_24_P137501     | 4.2                 | 1.3E-10 |
| GREM1                          | gremlin 1                                                            | A_23_P432947     | 4.2                 | 1.4E-06 |
| GJB2                           | gap junction protein, beta 2, 26kDa                                  | A_23_P204941     | 4.2                 | 1.5E-09 |
| BDKRB1                         | bradykinin receptor B1                                               | A_24_P919850     | 4.2                 | 4.4E-09 |
| COL17A1                        | collagen, type XVII, alpha 1                                         | A_23_P501010     | 4.1                 | 1.4E-13 |
| KRT17                          | keratin 17                                                           | A_23_P96158      | 4.1                 | 2.2E-09 |
| IGFL2                          | IGF-like family member 2                                             | A_23_P153571     | 4.1                 | 1.9E-06 |
| MMP13                          | matrix metalloproteinase 13 (collagenase 3)                          | A_23_P138931     | 4.1                 | 4.2E-06 |
| CCL11                          | chemokine (C-C motif) ligand 11                                      | A_23_P66635      | 4.1                 | 9.6E-09 |
| CXCL14                         | chemokine (C-X-C motif) ligand 14                                    | A_23_P213745     | 4.1                 | 3.8E-12 |
| CXCL6                          | chemokine (C-X-C motif) ligand 6 (granulocyte chemotactic protein 2) | A_23_P155755     | 4.0                 | 3.6E-05 |
| LRRC55                         | leucine rich repeat containing 55                                    | A_24_P819890     | 4.0                 | 2.4E-10 |
| MMP12                          | matrix metalloproteinase 12 (macrophage elastase)                    | A_23_P340698     | 3.8                 | 1.5E-05 |
| LGALS2                         | lectin, galactoside-binding, soluble, 2                              | A_23_P120902     | 3.8                 | 1.1E-06 |
| FNDC1                          | fibronectin type III domain containing 1                             | A_23_P407840     | 3.8                 | 2.8E-08 |
| SERPINB3                       | serpin peptidase inhibitor, clade B (ovalbumin), member 3            | A_23_P55632      | 3.7                 | 1.7E-03 |
| KRT14                          | keratin 14                                                           | A_24_P265346     | 3.7                 | 1.5E-08 |
| MMP11                          | matrix metalloproteinase 11 (stromelysin 3)                          | A_23_P57417      | 3.7                 | 1.1E-06 |
| SPP1                           | secreted phosphoprotein 1                                            | A_23_P7313       | 3.6                 | 1.5E-04 |
| IL13                           | interleukin 13                                                       | A_23_P251031     | 3.6                 | 1.1E-04 |
| HS6ST2                         | heparan sulfate 6-O-sulfotransferase 2                               | A_24_P105191     | 3.6                 | 1.3E-10 |
| MSMB                           | microseminoprotein, beta-                                            | A_24_P146683     | 3.6                 | 2.4E-02 |
| SPRR1A                         | small proline-rich protein 1A                                        | A_23_P74012      | 3.5                 | 8.0E-08 |
| SERPINB4                       | serpin peptidase inhibitor, clade B (ovalbumin), member 4            | A_23_P502413     | 3.5                 | 2.2E-03 |
| VTCN1                          | V-set domain containing T cell activation inhibitor 1                | A_23_P518        | 3.5                 | 1.2E-03 |
| IL8                            | interleukin 8                                                        | A_32_P87013      | 3.5                 | 2.4E-05 |
| COL10A1                        | collagen, type X, alpha 1                                            | A_23_P214144     | 3.4                 | 8.1E-07 |
| CXCL13                         | chemokine (C-X-C motif) ligand 13                                    | A_23_P121695     | 3.4                 | 1.0E-03 |
| MMP7                           | matrix metalloproteinase 7 (matrilysin, uterine)                     | A_23_P52761      | 3.4                 | 1.5E-10 |

|           |                                                                                           |              |     |         |
|-----------|-------------------------------------------------------------------------------------------|--------------|-----|---------|
| S100A2    | S100 calcium binding protein A2                                                           | A_23_P201706 | 3.4 | 7.4E-05 |
| TDO2      | tryptophan 2,3-dioxygenase                                                                | A_23_P80974  | 3.4 | 6.1E-10 |
| COL14A1   | collagen, type XIV, alpha 1                                                               | A_24_P254789 | 3.4 | 3.5E-12 |
| SCG5      | secretogranin V (7B2 protein)                                                             | A_23_P62081  | 3.3 | 5.4E-11 |
| SELE      | selectin E                                                                                | A_23_P97112  | 3.3 | 2.8E-05 |
| BDKRB2    | bradykinin receptor B2                                                                    | A_23_P304897 | 3.3 | 7.7E-11 |
| IGHV1-69  | immunoglobulin heavy variable 1-69                                                        | A_24_P367432 | 3.3 | 5.4E-08 |
| CHRD2     | chordin-like 2                                                                            | A_24_P335202 | 3.3 | 4.9E-08 |
| CCR7      | chemokine (C-C motif) receptor 7                                                          | A_23_P343398 | 3.3 | 5.6E-10 |
| C4orf7    | chromosome 4 open reading frame 7                                                         | A_23_P362694 | 3.3 | 1.5E-04 |
| POU2AF1   | POU class 2 associating factor 1                                                          | A_23_P312920 | 3.3 | 7.9E-07 |
| BNC1      | basonuclin 1                                                                              | A_23_P22134  | 3.3 | 3.0E-07 |
| CCL7      | chemokine (C-C motif) ligand 7                                                            | A_23_P78037  | 3.3 | 5.0E-04 |
| DIO2      | deiodinase, iodothyronine, type II                                                        | A_23_P48740  | 3.2 | 3.9E-11 |
| TNS4      | tensin 4                                                                                  | A_23_P207850 | 3.2 | 1.6E-05 |
| C20orf103 | chromosome 20 open reading frame 103                                                      | A_23_P40295  | 3.2 | 3.9E-10 |
| CD28      | CD28 molecule                                                                             | A_23_P91095  | 3.2 | 5.6E-11 |
| IGLJ3     | immunoglobulin lambda joining 3                                                           | A_24_P605563 | 3.2 | 1.1E-06 |
| CHIT1     | chitinase 1 (chitotriosidase)                                                             | A_23_P126278 | 3.1 | 1.5E-05 |
| CYP24A1   | cytochrome P450, family 24, subfamily A, polypeptide 1                                    | A_23_P28815  | 3.1 | 9.8E-05 |
| VCAM1     | vascular cell adhesion molecule 1                                                         | A_23_P34345  | 3.1 | 1.3E-10 |
| CCL19     | chemokine (C-C motif) ligand 19                                                           | A_23_P123853 | 3.1 | 4.8E-13 |
| CCL2      | chemokine (C-C motif) ligand 2                                                            | A_23_P89431  | 3.1 | 4.8E-08 |
| C15orf48  | chromosome 15 open reading frame 48                                                       | A_23_P26024  | 3.1 | 1.6E-09 |
| ATP6V0D2  | ATPase, H+ transporting, lysosomal 38kDa, V0 subunit d2                                   | A_23_P146146 | 3.0 | 2.4E-04 |
| TNIP3     | TNFAIP3 interacting protein 3                                                             | A_23_P386478 | 3.0 | 7.9E-06 |
| ALDH1A3   | aldehyde dehydrogenase 1 family, member A3                                                | A_23_P205959 | 3.0 | 2.7E-12 |
| F2RL2     | coagulation factor II (thrombin) receptor-like 2                                          | A_32_P60065  | 3.0 | 3.5E-06 |
| TMPRSS4   | transmembrane protease, serine 4                                                          | A_23_P127608 | 3.0 | 5.3E-06 |
| IL11      | interleukin 11                                                                            | A_23_P67169  | 3.0 | 8.3E-07 |
| IGJ       | immunoglobulin J polypeptide, linker protein for immunoglobulin alpha and mu polypeptides | A_23_P167168 | 3.0 | 4.0E-05 |
| MMP16     | matrix metalloproteinase 16 (membrane-inserted)                                           | A_23_P123448 | 3.0 | 4.7E-10 |
| CHI3L1    | chitinase 3-like 1 (cartilage glycoprotein-39)                                            | A_24_P274111 | 3.0 | 2.2E-07 |
| EGR3      | early growth response 3                                                                   | A_23_P216225 | 3.0 | 7.2E-06 |
| CTHRC1    | collagen triple helix repeat containing 1                                                 | A_23_P111888 | 2.9 | 2.2E-07 |
| LGALS7    | lectin, galactoside-binding, soluble, 7                                                   | A_24_P238250 | 2.9 | 2.3E-04 |
| TP63      | tumor protein p63                                                                         | A_23_P327380 | 2.9 | 1.7E-05 |
| CP        | ceruloplasmin (ferroxidase)                                                               | A_23_P414793 | 2.9 | 1.0E-04 |
| KRT6B     | keratin 6B                                                                                | A_23_P76249  | 2.9 | 8.4E-04 |
| SLAMF7    | SLAM family member 7                                                                      | A_24_P353638 | 2.9 | 1.3E-08 |

|           |                                                                                |              |     |         |
|-----------|--------------------------------------------------------------------------------|--------------|-----|---------|
| HAS2      | hyaluronan synthase 2                                                          | A_23_P10206  | 2.9 | 4.4E-06 |
| LRRN1     | leucine rich repeat neuronal 1                                                 | A_24_P240187 | 2.9 | 4.1E-09 |
| SCRG1     | stimulator of chondrogenesis 1                                                 | A_23_P167159 | 2.9 | 1.1E-06 |
| WNT10A    | wingless-type MMTV integration site family, member 10A                         | A_23_P102113 | 2.8 | 5.5E-14 |
| LGALS7B   | lectin, galactoside-binding, soluble, 7B                                       | A_24_P348118 | 2.8 | 2.8E-04 |
| RGS4      | regulator of G-protein signaling 4                                             | A_23_P200737 | 2.8 | 4.8E-08 |
| MMP10     | matrix metalloproteinase 10 (stromelysin 2)                                    | A_23_P13094  | 2.8 | 2.0E-04 |
| CLDN1     | claudin 1                                                                      | A_23_P57784  | 2.8 | 1.1E-09 |
| FHL2      | four and a half LIM domains 2                                                  | A_23_P108751 | 2.8 | 1.6E-13 |
| C6orf176  | chromosome 6 open reading frame 176                                            | A_24_P636301 | 2.8 | 2.0E-04 |
| LCN2      | lipocalin 2                                                                    | A_23_P169437 | 2.8 | 2.8E-05 |
| LRRC15    | leucine rich repeat containing 15                                              | A_24_P827037 | 2.8 | 7.3E-07 |
| KIAA0125  | KIAA0125                                                                       | A_24_P95723  | 2.8 | 5.5E-04 |
| P4HA3     | prolyl 4-hydroxylase, alpha polypeptide III                                    | A_23_P127957 | 2.7 | 6.9E-08 |
| LPPR4     | lipid phosphate phosphatase-related protein type 4                             | A_32_P148538 | 2.7 | 1.5E-09 |
| ZBTB32    | zinc finger and BTB domain containing 32                                       | A_23_P131024 | 2.7 | 1.4E-07 |
| SULF1     | sulfatase 1                                                                    | A_23_P43164  | 2.7 | 3.6E-10 |
| CD1A      | CD1a molecule                                                                  | A_23_P63167  | 2.7 | 6.1E-07 |
| IGHV3-48  | immunoglobulin heavy variable 3-48                                             | A_24_P204727 | 2.7 | 3.7E-06 |
| IGLL1     | immunoglobulin lambda-like polypeptide 1                                       | A_24_P83102  | 2.7 | 3.8E-06 |
| ADAMTS14  | ADAM metalloproteinase with thrombospondin type 1 motif, 14                    | A_24_P275073 | 2.7 | 6.0E-10 |
| AMPD1     | adenosine monophosphate deaminase 1                                            | A_23_P51787  | 2.7 | 5.9E-04 |
| DAPL1     | death associated protein-like 1                                                | A_23_P165598 | 2.6 | 1.3E-04 |
| LUZP2     | leucine zipper protein 2                                                       | A_24_P649282 | 2.6 | 1.9E-04 |
| KRT16     | keratin 16                                                                     | A_24_P392991 | 2.6 | 1.7E-05 |
| SMPX      | small muscle protein, X-linked                                                 | A_23_P253542 | 2.6 | 4.4E-06 |
| PROM1     | prominin 1                                                                     | A_23_P258463 | 2.6 | 9.1E-03 |
| KIF26B    | kinesin family member 26B                                                      | A_23_P63541  | 2.6 | 7.8E-07 |
| GPR110    | G protein-coupled receptor 110                                                 | A_23_P214267 | 2.6 | 1.2E-06 |
| SPINK1    | serine peptidase inhibitor, Kazal type 1                                       | A_23_P214079 | 2.6 | 1.5E-04 |
| CCR6      | chemokine (C-C motif) receptor 6                                               | A_24_P234921 | 2.6 | 1.7E-08 |
| DERL3     | Der1-like domain family, member 3                                              | A_23_P6362   | 2.6 | 2.6E-06 |
| ADCYAP1   | adenylate cyclase activating polypeptide 1 (pituitary)                         | A_24_P335781 | 2.5 | 9.1E-05 |
| KRT5      | keratin 5                                                                      | A_23_P218047 | 2.5 | 7.9E-05 |
| PAX9      | paired box 9                                                                   | A_32_P70818  | 2.5 | 1.9E-03 |
| COMP      | cartilage oligomeric matrix protein                                            | A_23_P90436  | 2.5 | 3.5E-06 |
| LOC642131 | putative V-set and immunoglobulin domain-containing protein 6-like             | A_24_P750327 | 2.5 | 8.3E-06 |
| CXCL1     | chemokine (C-X-C motif) ligand 1 (melanoma growth stimulating activity, alpha) | A_23_P7144   | 2.5 | 1.1E-04 |
| LYPD1     | LY6/PLAUR domain containing 1                                                  | A_32_P101031 | 2.5 | 2.1E-06 |

|            |                                                                     |              |     |         |
|------------|---------------------------------------------------------------------|--------------|-----|---------|
| SERPIND1   | serpin peptidase inhibitor, clade D (heparin cofactor), member 1    | A_24_P40306  | 2.5 | 2.1E-06 |
| UGT1A6     | UDP glucuronosyltransferase 1 family, polypeptide A6                | A_24_P222872 | 2.5 | 3.6E-04 |
| ZNF683     | zinc finger protein 683                                             | A_23_P318380 | 2.5 | 1.0E-05 |
| CDH3       | cadherin 3, type 1, P-cadherin (placental)                          | A_23_P49155  | 2.5 | 5.8E-12 |
| FCRL5      | Fc receptor-like 5                                                  | A_23_P201211 | 2.5 | 4.0E-05 |
| OXTR       | oxytocin receptor                                                   | A_23_P132619 | 2.5 | 1.0E-03 |
| PIP        | prolactin-induced protein                                           | A_23_P8702   | 2.5 | 2.1E-02 |
| DSG3       | desmoglein 3                                                        | A_23_P153120 | 2.5 | 2.4E-03 |
| HDC        | histidine decarboxylase                                             | A_23_P117662 | 2.5 | 4.3E-07 |
| CDKN2A     | cyclin-dependent kinase inhibitor 2A (melanoma, p16, inhibits CDK4) | A_23_P43484  | 2.5 | 1.7E-09 |
| JSRP1      | junctional sarcoplasmic reticulum protein 1                         | A_23_P397320 | 2.4 | 9.0E-05 |
| DPYS       | dihydropyrimidinase                                                 | A_23_P20303  | 2.4 | 1.2E-04 |
| THY1       | Thy-1 cell surface antigen                                          | A_23_P36364  | 2.4 | 1.3E-10 |
| CD24       | CD24 molecule                                                       | A_23_P85250  | 2.4 | 6.8E-11 |
| PSCA       | prostate stem cell antigen                                          | A_23_P71379  | 2.4 | 4.8E-02 |
| SFRP4      | secreted frizzled-related protein 4                                 | A_23_P215328 | 2.4 | 2.0E-05 |
| KIAA1199   | KIAA1199                                                            | A_23_P324754 | 2.4 | 4.4E-07 |
| MMP3       | matrix metalloproteinase 3 (stromelysin 1, progelatinase)           | A_23_P161698 | 2.4 | 5.0E-05 |
| PCSK1      | proprotein convertase subtilisin/kexin type 1                       | A_24_P174793 | 2.4 | 1.1E-03 |
| ANKRD30BP2 | ankyrin repeat domain 30B pseudogene 2                              | A_24_P917819 | 2.4 | 1.7E-03 |
| IGLV3-21   | immunoglobulin lambda variable 3-21                                 | A_24_P465799 | 2.4 | 1.9E-06 |
| TNN        | tenascin N                                                          | A_32_P480177 | 2.4 | 9.0E-05 |
| ADAMTS16   | ADAM metalloproteinase with thrombospondin type 1 motif, 16         | A_23_P41629  | 2.4 | 2.1E-04 |
| IGDCC4     | immunoglobulin superfamily, DCC subclass, member 4                  | A_23_P14673  | 2.4 | 1.7E-08 |
| C8orf47    | chromosome 8 open reading frame 47                                  | A_23_P333029 | 2.4 | 2.7E-03 |
| CXCR5      | chemokine (C-X-C motif) receptor 5                                  | A_24_P252945 | 2.4 | 3.0E-04 |
| CCR3       | chemokine (C-C motif) receptor 3                                    | A_23_P250302 | 2.4 | 7.2E-04 |
| STMN2      | stathmin-like 2                                                     | A_23_P146274 | 2.4 | 6.7E-05 |
| TMEM229A   | transmembrane protein 229A                                          | A_32_P47027  | 2.4 | 7.1E-06 |
| CPXM2      | carboxypeptidase X (M14 family), member 2                           | A_23_P138524 | 2.4 | 4.1E-10 |
| PCP4       | Purkinje cell protein 4                                             | A_23_P109322 | 2.4 | 9.6E-05 |
| TIGIT      | T cell immunoreceptor with Ig and ITIM domains                      | A_23_P80528  | 2.4 | 8.6E-08 |
| SCFV       | single-chain Fv fragment                                            | A_24_P889462 | 2.3 | 1.5E-05 |
| CLCA2      | chloride channel accessory 2                                        | A_23_P397248 | 2.3 | 6.5E-04 |
| COLEC11    | collectin sub-family member 11                                      | A_23_P120125 | 2.3 | 1.1E-06 |
| TMEM90B    | transmembrane protein 90B                                           | A_23_P251043 | 2.3 | 4.4E-10 |
| C13orf33   | chromosome 13 open reading frame 33                                 | A_24_P90597  | 2.3 | 1.0E-04 |
| CABYR      | calcium binding tyrosine-(Y)-phosphorylation regulated              | A_23_P314712 | 2.3 | 8.6E-08 |

|              |                                                                                  |              |     |         |
|--------------|----------------------------------------------------------------------------------|--------------|-----|---------|
| LOC100507254 | hypothetical LOC100507254                                                        | A_32_P101110 | 2.3 | 1.7E-04 |
| IGLL5        | immunoglobulin lambda-like polypeptide 5                                         | A_23_P159435 | 2.3 | 1.4E-03 |
| GEM          | GTP binding protein overexpressed in skeletal muscle                             | A_23_P257043 | 2.3 | 6.0E-11 |
| MS4A1        | membrane-spanning 4-domains, subfamily A, member 1                               | A_23_P116371 | 2.3 | 4.2E-04 |
| BAAT         | bile acid CoA: amino acid N-acyltransferase (glycine N-choloyltransferase)       | A_23_P71810  | 2.3 | 2.1E-07 |
| ZNF385D      | zinc finger protein 385D                                                         | A_23_P113748 | 2.3 | 2.1E-07 |
| SLCO1B3      | solute carrier organic anion transporter family, member 1B3                      | A_23_P105475 | 2.3 | 1.9E-04 |
| CHST6        | carbohydrate (N-acetylglucosamine 6-O) sulfotransferase 6                        | A_23_P106922 | 2.3 | 5.1E-04 |
| SIX4         | SIX homeobox 4                                                                   | A_32_P204205 | 2.3 | 6.8E-05 |
| FUT2         | fucosyltransferase 2 (secretor status included)                                  | A_24_P942969 | 2.3 | 1.1E-03 |
| KRT6C        | keratin 6C                                                                       | A_23_P366936 | 2.3 | 2.2E-02 |
| ARNTL2       | aryl hydrocarbon receptor nuclear translocator-like 2                            | A_32_P399546 | 2.3 | 5.1E-11 |
| IGKV1-5      | immunoglobulin kappa variable 1-5                                                | A_32_P722809 | 2.3 | 2.0E-04 |
| TSPAN11      | tetraspanin 11                                                                   | A_23_P76136  | 2.2 | 3.3E-09 |
| ASPN         | asporin                                                                          | A_23_P216429 | 2.2 | 1.4E-05 |
| IL4I1        | interleukin 4 induced 1                                                          | A_23_P502520 | 2.2 | 2.4E-03 |
| SCG2         | secretogranin II                                                                 | A_24_P88696  | 2.2 | 3.5E-06 |
| ABCA4        | ATP-binding cassette, sub-family A (ABC1), member 4                              | A_23_P160940 | 2.2 | 4.9E-06 |
| IGHG1        | immunoglobulin heavy constant gamma 1 (G1m marker)                               | A_23_P390209 | 2.2 | 6.6E-03 |
| CXCL12       | chemokine (C-X-C motif) ligand 12                                                | A_24_P412156 | 2.2 | 4.4E-08 |
| PLA2G7       | phospholipase A2, group VII (platelet-activating factor acetylhydrolase, plasma) | A_23_P145096 | 2.2 | 8.6E-05 |
| COL15A1      | collagen, type XV, alpha 1                                                       | A_23_P112554 | 2.2 | 1.2E-07 |
| LTB          | lymphotoxin beta (TNF superfamily, member 3)                                     | A_23_P93348  | 2.2 | 6.5E-08 |
| KRT16P3      | keratin 16 pseudogene 3                                                          | A_32_P62963  | 2.2 | 1.6E-04 |
| KIAA1211     | KIAA1211                                                                         | A_24_P331882 | 2.2 | 7.2E-09 |
| OGDHL        | oxoglutarate dehydrogenase-like                                                  | A_23_P161297 | 2.2 | 1.3E-04 |
| EDN2         | endothelin 2                                                                     | A_23_P312150 | 2.2 | 1.3E-04 |
| CH25H        | cholesterol 25-hydroxylase                                                       | A_23_P86470  | 2.2 | 1.9E-05 |
| LGI2         | leucine-rich repeat LGI family, member 2                                         | A_23_P7194   | 2.2 | 4.5E-08 |
| CLC          | Charcot-Leyden crystal protein                                                   | A_23_P101683 | 2.2 | 4.5E-02 |
| SIX1         | SIX homeobox 1                                                                   | A_23_P76914  | 2.2 | 2.4E-03 |
| GDA          | guanine deaminase                                                                | A_24_P393571 | 2.2 | 3.0E-04 |
| BHLHE22      | basic helix-loop-helix family, member e22                                        | A_32_P75581  | 2.2 | 4.5E-07 |
| C21orf7      | chromosome 21 open reading frame 7                                               | A_23_P57277  | 2.2 | 1.3E-06 |
| SERPINB5     | serpin peptidase inhibitor, clade B (ovalbumin), member 5                        | A_23_P208126 | 2.2 | 8.0E-04 |
| PCDH7        | protocadherin 7                                                                  | A_23_P310921 | 2.2 | 4.3E-06 |
| B3GNT3       | UDP-GlcNAc:betaGal beta-1,3-N-                                                   | A_23_P78980  | 2.2 | 1.4E-05 |



|              |                                                                                                      |              |     |         |
|--------------|------------------------------------------------------------------------------------------------------|--------------|-----|---------|
|              | acetylglucosaminyltransferase 3                                                                      |              |     |         |
| APOBEC3H     | apolipoprotein B mRNA editing enzyme, catalytic polypeptide-like 3H                                  | A_32_P347617 | 2.2 | 8.2E-05 |
| GRIN2A       | glutamate receptor, ionotropic, N-methyl D-aspartate 2A                                              | A_32_P169114 | 2.2 | 1.2E-05 |
| IGKC         | immunoglobulin kappa constant                                                                        | A_24_P263786 | 2.2 | 5.8E-03 |
| ABCA13       | ATP-binding cassette, sub-family A (ABC1), member 13                                                 | A_23_P364324 | 2.2 | 7.7E-03 |
| SNAP25       | synaptosomal-associated protein, 25kDa                                                               | A_23_P210756 | 2.2 | 2.2E-07 |
| PAMR1        | peptidase domain containing associated with muscle regeneration 1                                    | A_23_P127911 | 2.2 | 2.6E-07 |
| DST          | dystonin                                                                                             | A_23_P59388  | 2.2 | 2.0E-04 |
| EPHA10       | EPH receptor A10                                                                                     | A_24_P930741 | 2.2 | 3.4E-07 |
| IGLV6-57     | immunoglobulin lambda variable 6-57                                                                  | A_24_P361816 | 2.2 | 3.2E-05 |
| RHOV         | ras homolog gene family, member V                                                                    | A_23_P424561 | 2.2 | 2.8E-03 |
| RGS1         | regulator of G-protein signaling 1                                                                   | A_23_P97141  | 2.1 | 4.9E-05 |
| CTSG         | cathepsin G                                                                                          | A_23_P140384 | 2.1 | 3.1E-04 |
| PTGES        | prostaglandin E synthase                                                                             | A_24_P403417 | 2.1 | 6.7E-09 |
| MDK          | midkine (neurite growth-promoting factor 2)                                                          | A_23_P116235 | 2.1 | 4.8E-13 |
| STEAP1       | six transmembrane epithelial antigen of the prostate 1                                               | A_24_P406334 | 2.1 | 2.0E-06 |
| THBS4        | thrombospondin 4                                                                                     | A_24_P260443 | 2.1 | 7.2E-07 |
| ABCA12       | ATP-binding cassette, sub-family A (ABC1), member 12                                                 | A_23_P56369  | 2.1 | 6.8E-05 |
| LY6D         | lymphocyte antigen 6 complex, locus D                                                                | A_23_P134764 | 2.1 | 1.6E-03 |
| ANXA10       | annexin A10                                                                                          | A_23_P58328  | 2.1 | 1.9E-03 |
| PDLIM4       | PDZ and LIM domain 4                                                                                 | A_23_P144796 | 2.1 | 3.9E-11 |
| DUSP5        | dual specificity phosphatase 5                                                                       | A_23_P150018 | 2.1 | 1.9E-05 |
| DSC3         | desmocollin 3                                                                                        | A_24_P344416 | 2.1 | 1.5E-02 |
| HSPA4L       | heat shock 70kDa protein 4-like                                                                      | A_23_P363936 | 2.1 | 1.5E-05 |
| MUC4         | mucin 4, cell surface associated                                                                     | A_24_P208825 | 2.1 | 2.7E-04 |
| TNFRSF17     | tumor necrosis factor receptor superfamily, member 17                                                | A_23_P37736  | 2.1 | 1.1E-03 |
| IL17RD       | interleukin 17 receptor D                                                                            | A_32_P188860 | 2.1 | 5.0E-08 |
| FAM83D       | family with sequence similarity 83, member D                                                         | A_23_P323751 | 2.1 | 3.2E-05 |
| POSTN        | periostin, osteoblast specific factor                                                                | A_24_P347411 | 2.1 | 1.4E-05 |
| PNOC         | prepronociceptin                                                                                     | A_23_P253321 | 2.1 | 4.4E-05 |
| LOC100287221 | hypothetical LOC100287221                                                                            | A_24_P282266 | 2.1 | 2.3E-05 |
| GLI1         | GLI family zinc finger 1                                                                             | A_23_P105251 | 2.1 | 2.0E-08 |
| GDF15        | growth differentiation factor 15                                                                     | A_23_P16523  | 2.1 | 4.0E-06 |
| SLC2A5       | solute carrier family 2 (facilitated glucose/fructose transporter), member 5                         | A_23_P160159 | 2.1 | 2.3E-05 |
| SRD5A2       | steroid-5-alpha-reductase, alpha polypeptide 2 (3-oxo-5 alpha-steroid delta 4-dehydrogenase alpha 2) | A_23_P28186  | 2.1 | 3.2E-02 |
| IL6          | interleukin 6 (interferon, beta 2)                                                                   | A_23_P71037  | 2.1 | 1.2E-03 |
| COL1A1       | collagen, type I, alpha 1                                                                            | A_23_P207520 | 2.1 | 6.2E-06 |

|           |                                                                                       |              |     |         |
|-----------|---------------------------------------------------------------------------------------|--------------|-----|---------|
| SLN       | sarcosin                                                                              | A_23_P150343 | 2.1 | 4.7E-04 |
| ANO4      | anoctamin 4                                                                           | A_23_P409093 | 2.1 | 2.4E-04 |
| KLK7      | kallikrein-related peptidase 7                                                        | A_23_P39056  | 2.1 | 2.1E-03 |
| PTPRZ1    | protein tyrosine phosphatase, receptor-type, Z polypeptide 1                          | A_23_P168761 | 2.0 | 9.5E-04 |
| ITGB8     | integrin, beta 8                                                                      | A_24_P759477 | 2.0 | 2.0E-08 |
| ALDH3A1   | aldehyde dehydrogenase 3 family, member A1                                            | A_23_P207213 | 2.0 | 2.6E-03 |
| MZB1      | marginal zone B and B1 cell-specific protein                                          | A_23_P84596  | 2.0 | 7.1E-05 |
| CPZ       | carboxypeptidase Z                                                                    | A_23_P58251  | 2.0 | 3.0E-05 |
| PIM2      | pim-2 oncogene                                                                        | A_24_P379104 | 2.0 | 1.2E-05 |
| IGK@      | immunoglobulin kappa locus                                                            | A_24_P677559 | 2.0 | 2.7E-06 |
| CXCL9     | chemokine (C-X-C motif) ligand 9                                                      | A_23_P18452  | 2.0 | 7.5E-03 |
| TTL3      | tubulin tyrosine ligase-like family, member 3                                         | A_24_P917492 | 2.0 | 3.4E-05 |
| LOC389023 | hypothetical LOC389023                                                                | A_32_P86578  | 2.0 | 3.3E-09 |
| CD19      | CD19 molecule                                                                         | A_23_P113572 | 2.0 | 3.3E-04 |
| THBS2     | thrombospondin 2                                                                      | A_24_P605612 | 2.0 | 3.4E-05 |
| RHBDL2    | rhomboid, veinlet-like 2 (Drosophila)                                                 | A_32_P46571  | 2.0 | 2.6E-06 |
| CD1C      | CD1c molecule                                                                         | A_23_P51767  | 2.0 | 2.6E-07 |
| PTGS2     | prostaglandin-endoperoxide synthase 2 (prostaglandin G/H synthase and cyclooxygenase) | A_24_P77008  | 2.0 | 7.3E-05 |
| HTR2A     | 5-hydroxytryptamine (serotonin) receptor 2A                                           | A_24_P355967 | 2.0 | 4.2E-06 |
| EPHA3     | EPH receptor A3                                                                       | A_23_P169819 | 2.0 | 1.9E-07 |
| MIR100HG  | mir-100-let-7a-2 cluster host gene (non-protein coding)                               | A_32_P232883 | 2.0 | 1.9E-08 |
| GSTA5     | glutathione S-transferase alpha 5                                                     | A_23_P93141  | 2.0 | 8.2E-03 |
| MXRA5     | matrix-remodelling associated 5                                                       | A_23_P258136 | 2.0 | 3.1E-08 |
| EGR1      | early growth response 1                                                               | A_23_P214080 | 2.0 | 1.2E-04 |
| SAA4      | serum amyloid A4, constitutive                                                        | A_23_P87238  | 2.0 | 2.2E-02 |
| LIF       | leukemia inhibitory factor (cholinergic differentiation factor)                       | A_24_P122137 | 2.0 | 7.4E-07 |
| TNFRSF11B | tumor necrosis factor receptor superfamily, member 11b                                | A_24_P192485 | 2.0 | 9.4E-05 |
| CLIC6     | chloride intracellular channel 6                                                      | A_23_P385067 | 2.0 | 9.9E-06 |
| TRAT1     | T cell receptor associated transmembrane adaptor 1                                    | A_23_P212568 | 2.0 | 8.7E-05 |
| TMEM158   | transmembrane protein 158 (gene/pseudogene)                                           | A_23_P369899 | 2.0 | 2.2E-07 |
| SH2D1A    | SH2 domain containing 1A                                                              | A_23_P45248  | 2.0 | 7.4E-05 |
| RASGRP1   | RAS guanyl releasing protein 1 (calcium and DAG-regulated)                            | A_23_P124642 | 2.0 | 5.9E-07 |
| FAP       | fibroblast activation protein, alpha                                                  | A_23_P56746  | 2.0 | 2.3E-05 |
| SDK2      | sidekick homolog 2 (chicken)                                                          | A_32_P194312 | 2.0 | 1.6E-08 |
| SDS       | serine dehydratase                                                                    | A_23_P2645   | 2.0 | 6.0E-05 |
| ALPK2     | alpha-kinase 2                                                                        | A_23_P15876  | 2.0 | 3.0E-04 |
| FAM43B    | family with sequence similarity 43, member B                                          | A_32_P125338 | 2.0 | 1.3E-07 |
| FAM81B    | family with sequence similarity 81, member B                                          | A_23_P360354 | 2.0 | 1.5E-02 |
| HTRA4     | HtrA serine peptidase 4                                                               | A_23_P44421  | 2.0 | 5.3E-03 |

|          |                                                                            |              |     |         |
|----------|----------------------------------------------------------------------------|--------------|-----|---------|
| LRRC17   | leucine rich repeat containing 17                                          | A_23_P253958 | 2.0 | 3.1E-06 |
| CFB      | complement factor B                                                        | A_23_P156687 | 1.9 | 2.3E-06 |
| IGHA1    | immunoglobulin heavy constant alpha 1                                      | A_24_P395415 | 1.9 | 9.3E-03 |
| FERMT1   | fermitin family member 1                                                   | A_23_P131935 | 1.9 | 4.9E-07 |
| HES2     | hairy and enhancer of split 2 (Drosophila)                                 | A_23_P304716 | 1.9 | 2.2E-07 |
| GSTA1    | glutathione S-transferase alpha 1                                          | A_23_P135417 | 1.9 | 3.4E-03 |
| ZNF469   | zinc finger protein 469                                                    | A_32_P116556 | 1.9 | 4.3E-08 |
| ASB2     | ankyrin repeat and SOCS box containing 2                                   | A_23_P205370 | 1.9 | 2.3E-07 |
| LEMD1    | LEM domain containing 1                                                    | A_24_P696761 | 1.9 | 4.3E-04 |
| CTSK     | cathepsin K                                                                | A_23_P34744  | 1.9 | 3.7E-08 |
| TGFB3    | transforming growth factor, beta 3                                         | A_24_P373096 | 1.9 | 1.9E-03 |
| VMP1     | vacuole membrane protein 1                                                 | A_32_P9753   | 1.9 | 1.3E-09 |
| IGKV2-24 | immunoglobulin kappa variable 2-24                                         | A_24_P306905 | 1.9 | 6.7E-05 |
| KRT15    | keratin 15                                                                 | A_23_P27133  | 1.9 | 5.6E-03 |
| SLC4A11  | solute carrier family 4, sodium borate transporter, member 11              | A_23_P154688 | 1.9 | 8.6E-05 |
| FHOD3    | formin homology 2 domain containing 3                                      | A_32_P34444  | 1.9 | 8.5E-04 |
| GCNT3    | glucosaminyl (N-acetyl) transferase 3, mucin type                          | A_23_P420209 | 1.9 | 6.6E-05 |
| MYBPH    | myosin binding protein H                                                   | A_23_P148737 | 1.9 | 4.9E-04 |
| PRSS2    | protease, serine, 2 (trypsin 2)                                            | A_32_P94444  | 1.9 | 1.0E-03 |
| KRT23    | keratin 23 (histone deacetylase inducible)                                 | A_23_P78248  | 1.9 | 3.3E-02 |
| C5orf20  | chromosome 5 open reading frame 20                                         | A_23_P81441  | 1.9 | 9.6E-06 |
| GSTA2    | glutathione S-transferase alpha 2                                          | A_24_P300394 | 1.9 | 8.2E-03 |
| IFNE     | interferon, epsilon                                                        | A_23_P302060 | 1.9 | 8.5E-04 |
| TNFRSF9  | tumor necrosis factor receptor superfamily, member 9                       | A_23_P51936  | 1.9 | 1.5E-07 |
| EFHC2    | EF-hand domain (C-terminal) containing 2                                   | A_24_P147927 | 1.9 | 4.9E-03 |
| DACH2    | dachshund homolog 2 (Drosophila)                                           | A_32_P464135 | 1.8 | 4.6E-06 |
| TTR      | transthyretin                                                              | A_23_P130333 | 1.8 | 3.2E-02 |
| FAM150A  | family with sequence similarity 150, member A                              | A_24_P935794 | 1.8 | 3.3E-04 |
| LOC96610 | BMS1 homolog, ribosome assembly protein (yeast) pseudogene                 | A_24_P93316  | 1.8 | 2.0E-04 |
| IGKV1D-8 | immunoglobulin kappa variable 1D-8                                         | A_24_P93523  | 1.8 | 4.2E-04 |
| COCH     | coagulation factor C homolog, cochlin (Limulus polyphemus)                 | A_24_P184799 | 1.8 | 1.6E-06 |
| SLC28A3  | solute carrier family 28 (sodium-coupled nucleoside transporter), member 3 | A_23_P32078  | 1.8 | 3.8E-03 |
| NFATC2   | nuclear factor of activated T-cells, cytoplasmic, calcineurin-dependent 2  | A_24_P525917 | 1.8 | 1.3E-05 |
| GJB5     | gap junction protein, beta 5, 31.1kDa                                      | A_23_P35293  | 1.8 | 2.7E-02 |
| CPNE4    | copine IV                                                                  | A_23_P327551 | 1.8 | 6.5E-07 |
| EREG     | epiregulin                                                                 | A_23_P41344  | 1.8 | 5.9E-03 |
| CDH2     | cadherin 2, type 1, N-cadherin (neuronal)                                  | A_23_P38732  | 1.8 | 3.2E-05 |
| SYTL2    | synaptotagmin-like 2                                                       | A_23_P53193  | 1.8 | 2.3E-11 |
| CD3D     | CD3d molecule, delta (CD3-TCR complex)                                     | A_23_P138985 | 1.8 | 1.9E-06 |

|          |                                                                    |              |     |         |
|----------|--------------------------------------------------------------------|--------------|-----|---------|
| LIPG     | lipase, endothelial                                                | A_24_P125469 | 1.8 | 5.0E-03 |
| TRBV5-4  | T cell receptor beta variable 5-4                                  | A_23_P352861 | 1.8 | 1.5E-07 |
| CCL20    | chemokine (C-C motif) ligand 20                                    | A_23_P17065  | 1.8 | 5.2E-03 |
| EGR4     | early growth response 4                                            | A_23_P380318 | 1.8 | 8.1E-03 |
| DOCK3    | dedicator of cytokinesis 3                                         | A_24_P153643 | 1.8 | 7.4E-06 |
| TUBB3    | tubulin, beta 3                                                    | A_23_P77493  | 1.8 | 1.4E-06 |
| SPRR1B   | small proline-rich protein 1B                                      | A_23_P159406 | 1.8 | 5.0E-04 |
| MOXD1    | monooxygenase, DBH-like 1                                          | A_23_P31064  | 1.8 | 1.1E-05 |
| ENTHD1   | ENTH domain containing 1                                           | A_23_P410115 | 1.8 | 6.7E-06 |
| CD1E     | CD1e molecule                                                      | A_23_P201160 | 1.8 | 2.2E-03 |
| CD200    | CD200 molecule                                                     | A_23_P121480 | 1.8 | 1.0E-07 |
| IRF4     | interferon regulatory factor 4                                     | A_23_P214360 | 1.8 | 1.7E-04 |
| GPR18    | G protein-coupled receptor 18                                      | A_23_P14165  | 1.7 | 3.2E-03 |
| CDCA7    | cell division cycle associated 7                                   | A_23_P251421 | 1.7 | 8.2E-08 |
| SLC5A8   | solute carrier family 5 (iodide transporter), member 8             | A_23_P338542 | 1.7 | 3.0E-02 |
| GABBR2   | gamma-aminobutyric acid (GABA) B receptor, 2                       | A_23_P112275 | 1.7 | 9.8E-03 |
| CBLN4    | cerebellin 4 precursor                                             | A_23_P313428 | 1.7 | 2.0E-02 |
| FLJ22536 | hypothetical locus LOC401237                                       | A_24_P861099 | 1.7 | 3.4E-07 |
| SSTR2    | somatostatin receptor 2                                            | A_23_P38630  | 1.7 | 3.1E-07 |
| NELL2    | NEL-like 2 (chicken)                                               | A_23_P10025  | 1.7 | 3.3E-03 |
| MB       | myoglobin                                                          | A_23_P6433   | 1.7 | 8.1E-03 |
| RAB3C    | RAB3C, member RAS oncogene family                                  | A_23_P44794  | 1.7 | 2.9E-06 |
| ZG16B    | zymogen granule protein 16 homolog B (rat)                         | A_23_P118203 | 1.7 | 1.6E-02 |
| SLAMF1   | signaling lymphocytic activation molecule family member 1          | A_23_P62652  | 1.7 | 8.0E-05 |
| LRRC4C   | leucine rich repeat containing 4C                                  | A_23_P24457  | 1.7 | 2.0E-06 |
| HSPB3    | heat shock 27kDa protein 3                                         | A_23_P92730  | 1.7 | 5.8E-04 |
| SYNJ2    | synaptojanin 2                                                     | A_23_P344719 | 1.7 | 8.8E-05 |
| PRRX1    | paired related homeobox 1                                          | A_23_P502731 | 1.7 | 1.3E-06 |
| IGF1     | insulin-like growth factor 1 (somatomedin C)                       | A_24_P398572 | 1.7 | 4.8E-03 |
| HLA-DPB2 | major histocompatibility complex, class II, DP beta 2 (pseudogene) | A_23_P59167  | 1.7 | 5.6E-04 |
| RGS17    | regulator of G-protein signaling 17                                | A_23_P156861 | 1.7 | 9.8E-05 |
| EGR2     | early growth response 2                                            | A_23_P46936  | 1.7 | 9.3E-05 |
| SCAMP5   | secretory carrier membrane protein 5                               | A_23_P152047 | 1.7 | 5.6E-06 |
| FGF1     | fibroblast growth factor 1 (acidic)                                | A_23_P213336 | 1.7 | 1.2E-04 |
| HRK      | harakiri, BCL2 interacting protein (contains only BH3 domain)      | A_23_P25194  | 1.7 | 5.6E-03 |
| KCND2    | potassium voltage-gated channel, Shal-related subfamily, member 2  | A_23_P259251 | 1.7 | 2.3E-04 |
| CD69     | CD69 molecule                                                      | A_23_P87879  | 1.7 | 8.0E-05 |
| SV2B     | synaptic vesicle glycoprotein 2B                                   | A_23_P100022 | 1.7 | 4.0E-07 |
| ACAN     | aggrecan                                                           | A_23_P307310 | 1.7 | 1.3E-05 |

|              |                                                                      |              |     |         |
|--------------|----------------------------------------------------------------------|--------------|-----|---------|
| MSC          | musculin                                                             | A_23_P256948 | 1.7 | 1.5E-04 |
| SPOCD1       | SPOC domain containing 1                                             | A_24_P932887 | 1.7 | 9.1E-05 |
| LOC100505633 | hypothetical LOC100505633                                            | A_24_P828496 | 1.7 | 7.1E-03 |
| HMGA2        | high mobility group AT-hook 2                                        | A_23_P95930  | 1.7 | 1.3E-02 |
| ITGB3        | integrin, beta 3 (platelet glycoprotein IIIa, antigen CD61)          | A_24_P929003 | 1.7 | 1.1E-04 |
| CPNE5        | copine V                                                             | A_23_P360804 | 1.7 | 3.2E-05 |
| PLAU         | plasminogen activator, urokinase                                     | A_23_P24104  | 1.7 | 2.1E-08 |
| IL1RN        | interleukin 1 receptor antagonist                                    | A_23_P209995 | 1.7 | 6.2E-04 |
| SAMD11       | sterile alpha motif domain containing 11                             | A_24_P402510 | 1.7 | 6.7E-09 |
| PRRX2        | paired related homeobox 2                                            | A_23_P83298  | 1.7 | 4.0E-08 |
| FOSB         | FBJ murine osteosarcoma viral oncogene homolog B                     | A_23_P429998 | 1.7 | 4.2E-02 |
| DNER         | delta/notch-like EGF repeat containing                               | A_23_P362148 | 1.7 | 3.0E-02 |
| VSIG1        | V-set and immunoglobulin domain containing 1                         | A_32_P163147 | 1.7 | 2.0E-02 |
| TNFAIP6      | tumor necrosis factor, alpha-induced protein 6                       | A_23_P165624 | 1.7 | 3.0E-04 |
| TSHZ2        | teashirt zinc finger homeobox 2                                      | A_23_P143247 | 1.7 | 1.1E-06 |
| NHS          | Nance-Horan syndrome (congenital cataracts and dental anomalies)     | A_32_P126375 | 1.7 | 1.6E-07 |
| D4S234E      | DNA segment on chromosome 4 (unique) 234 expressed sequence          | A_23_P371107 | 1.7 | 7.9E-06 |
| TIMD4        | T-cell immunoglobulin and mucin domain containing 4                  | A_23_P7503   | 1.7 | 9.4E-03 |
| UGCG         | UDP-glucose ceramide glucosyltransferase                             | A_32_P161140 | 1.7 | 1.6E-09 |
| ADRA2A       | adrenergic, alpha-2A-, receptor                                      | A_23_P138706 | 1.6 | 1.4E-09 |
| FCRLA        | Fc receptor-like A                                                   | A_23_P46039  | 1.6 | 2.5E-03 |
| RARRES1      | retinoic acid receptor responder (tazarotene induced) 1              | A_23_P18078  | 1.6 | 6.9E-05 |
| F5           | coagulation factor V (proaccelerin, labile factor)                   | A_32_P41604  | 1.6 | 9.8E-05 |
| TRIM29       | tripartite motif containing 29                                       | A_23_P203267 | 1.6 | 1.1E-02 |
| HHLA2        | HERV-H LTR-associating 2                                             | A_23_P368805 | 1.6 | 1.4E-02 |
| SMOC1        | SPARC related modular calcium binding 1                              | A_24_P258473 | 1.6 | 1.1E-04 |
| KLHDC7B      | kelch domain containing 7B                                           | A_24_P117410 | 1.6 | 6.6E-06 |
| KCNH8        | potassium voltage-gated channel, subfamily H (eag-related), member 8 | A_23_P170636 | 1.6 | 3.9E-05 |
| CCDC80       | coiled-coil domain containing 80                                     | A_23_P58082  | 1.6 | 4.2E-04 |
| FRMD5        | FERM domain containing 5                                             | A_23_P26037  | 1.6 | 1.6E-05 |
| TMEM130      | transmembrane protein 130                                            | A_23_P349966 | 1.6 | 6.5E-04 |
| FRMD6        | FERM domain containing 6                                             | A_24_P330303 | 1.6 | 1.6E-09 |
| SERPINB2     | serpin peptidase inhibitor, clade B (ovalbumin), member 2            | A_24_P245379 | 1.6 | 5.2E-03 |
| PLCH2        | phospholipase C, eta 2                                               | A_24_P62469  | 1.6 | 2.1E-05 |
| MKX          | mohawk homeobox                                                      | A_24_P326491 | 1.6 | 2.6E-03 |
| TFPI2        | tissue factor pathway inhibitor 2                                    | A_23_P393620 | 1.6 | 1.5E-05 |
| FNDC4        | fibronectin type III domain containing 4                             | A_23_P16834  | 1.6 | 8.0E-08 |
| MUCL1        | mucin-like 1                                                         | A_23_P150979 | 1.6 | 2.6E-02 |

|          |                                                                                   |              |     |         |
|----------|-----------------------------------------------------------------------------------|--------------|-----|---------|
| CD38     | CD38 molecule                                                                     | A_23_P167328 | 1.6 | 1.1E-04 |
| KLHDC8A  | kelch domain containing 8A                                                        | A_24_P62800  | 1.6 | 2.8E-04 |
| IER3     | immediate early response 3                                                        | A_23_P42257  | 1.6 | 8.5E-06 |
| ODZ4     | odz, odd Oz/ten-m homolog 4 (Drosophila)                                          | A_24_P342312 | 1.6 | 1.7E-05 |
| UBASH3A  | ubiquitin associated and SH3 domain containing A                                  | A_23_P6293   | 1.6 | 4.7E-05 |
| ICOS     | inducible T-cell co-stimulator                                                    | A_23_P371215 | 1.6 | 6.3E-06 |
| IVL      | involucrin                                                                        | A_23_P353524 | 1.6 | 2.3E-03 |
| MGC16025 | hypothetical LOC85009                                                             | A_23_P79572  | 1.6 | 1.8E-04 |
| PDE1A    | phosphodiesterase 1A, calmodulin-dependent                                        | A_23_P79272  | 1.6 | 2.2E-06 |
| ECEL1    | endothelin converting enzyme-like 1                                               | A_32_P155666 | 1.6 | 4.0E-03 |
| TMEM45A  | transmembrane protein 45A                                                         | A_23_P113212 | 1.6 | 1.1E-03 |
| KCNMB2   | potassium large conductance calcium-activated channel, subfamily M, beta member 2 | A_23_P158675 | 1.6 | 8.6E-03 |
| SIT1     | signaling threshold regulating transmembrane adaptor 1                            | A_23_P43369  | 1.6 | 2.6E-05 |
| CD48     | CD48 molecule                                                                     | A_32_P175934 | 1.6 | 2.6E-04 |
| TRAJ17   | T cell receptor alpha joining 17                                                  | A_23_P258504 | 1.6 | 1.0E-07 |
| COL24A1  | collagen, type XXIV, alpha 1                                                      | A_23_P74701  | 1.6 | 9.3E-06 |
| PRR15    | proline rich 15                                                                   | A_32_P154911 | 1.6 | 3.2E-02 |
| BLK      | B lymphoid tyrosine kinase                                                        | A_23_P31725  | 1.6 | 1.6E-02 |
| CCR5     | chemokine (C-C motif) receptor 5                                                  | A_23_P412321 | 1.6 | 2.2E-04 |
| ANK1     | ankyrin 1, erythrocytic                                                           | A_24_P162485 | 1.6 | 1.7E-04 |
| AIM2     | absent in melanoma 2                                                              | A_32_P44394  | 1.6 | 6.5E-04 |
| GLI2     | GLI family zinc finger 2                                                          | A_23_P500034 | 1.6 | 4.0E-07 |
| ZNF215   | zinc finger protein 215                                                           | A_23_P53057  | 1.6 | 6.7E-04 |
| SVOPL    | SVOP-like                                                                         | A_23_P307860 | 1.6 | 6.2E-05 |
| CCL5     | chemokine (C-C motif) ligand 5                                                    | A_23_P152838 | 1.6 | 3.8E-05 |
| MEOX1    | mesenchyme homeobox 1                                                             | A_23_P107173 | 1.6 | 3.6E-04 |
| ITGBL1   | integrin, beta-like 1 (with EGF-like repeat domains)                              | A_24_P916965 | 1.6 | 4.3E-03 |
| PHLDA1   | pleckstrin homology-like domain, family A, member 1                               | A_24_P943597 | 1.6 | 4.1E-05 |
| C2orf27A | chromosome 2 open reading frame 27A                                               | A_32_P32061  | 1.6 | 3.5E-06 |
| GOLM1    | golgi membrane protein 1                                                          | A_24_P394865 | 1.6 | 6.4E-08 |
| DUXAP10  | double homeobox A pseudogene 10                                                   | A_24_P901856 | 1.6 | 6.0E-04 |
| FAM169A  | family with sequence similarity 169, member A                                     | A_32_P84242  | 1.6 | 7.6E-07 |
| ITGA11   | integrin, alpha 11                                                                | A_23_P206022 | 1.6 | 4.4E-05 |
| RHOXF1   | RhoX homeobox family, member 1                                                    | A_23_P85082  | 1.5 | 3.4E-03 |
| POF1B    | premature ovarian failure, 1B                                                     | A_24_P250815 | 1.5 | 9.1E-03 |
| COL22A1  | collagen, type XXII, alpha 1                                                      | A_32_P405759 | 1.5 | 4.7E-03 |
| TM4SF19  | transmembrane 4 L six family member 19                                            | A_23_P372946 | 1.5 | 1.6E-02 |
| KLHL13   | kelch-like 13 (Drosophila)                                                        | A_23_P159974 | 1.5 | 8.3E-07 |
| CREM     | cAMP responsive element modulator                                                 | A_24_P278393 | 1.5 | 4.4E-05 |
| LUM      | lumican                                                                           | A_32_P28664  | 1.5 | 6.5E-04 |

|            |                                                                                                              |              |     |         |
|------------|--------------------------------------------------------------------------------------------------------------|--------------|-----|---------|
| BTLA       | B and T lymphocyte associated                                                                                | A_23_P80883  | 1.5 | 2.5E-03 |
| CD96       | CD96 molecule                                                                                                | A_23_P44155  | 1.5 | 1.3E-04 |
| HS3ST3A1   | heparan sulfate (glucosamine) 3-O-sulfotransferase 3A1                                                       | A_23_P66525  | 1.5 | 4.5E-05 |
| RELB       | v-rel reticuloendotheliosis viral oncogene homolog B                                                         | A_23_P55706  | 1.5 | 2.0E-07 |
| KCNN4      | potassium intermediate/small conductance calcium-activated channel, subfamily N, member 4                    | A_23_P67529  | 1.5 | 8.6E-08 |
| ST6GALNAC1 | ST6 (alpha-N-acetyl-neuraminy-2,3-beta-galactosyl-1,3)-N-acetylgalactosaminide alpha-2,6-sialyltransferase 1 | A_23_P54968  | 1.5 | 3.2E-03 |
| STEAP4     | STEAP family member 4                                                                                        | A_24_P351906 | 1.5 | 2.0E-05 |
| VMO1       | vitelline membrane outer layer 1 homolog (chicken)                                                           | A_23_P55356  | 1.5 | 2.0E-06 |
| NCOA7      | nuclear receptor coactivator 7                                                                               | A_23_P156957 | 1.5 | 1.0E-06 |
| IL12RB2    | interleukin 12 receptor, beta 2                                                                              | A_23_P72077  | 1.5 | 6.6E-03 |
| TWIST1     | twist homolog 1 (Drosophila)                                                                                 | A_23_P71067  | 1.5 | 3.6E-06 |
| ANKRD43    | ankyrin repeat domain 43                                                                                     | A_23_P304110 | 1.5 | 2.3E-02 |
| HAS1       | hyaluronan synthase 1                                                                                        | A_23_P27400  | 1.5 | 2.5E-03 |
| NTN3       | netrin 3                                                                                                     | A_24_P488083 | 1.5 | 2.0E-04 |
| DAPP1      | dual adaptor of phosphotyrosine and 3-phosphoinositides                                                      | A_23_P255444 | 1.5 | 4.5E-08 |
| CALB2      | calbindin 2                                                                                                  | A_23_P21092  | 1.5 | 5.5E-03 |
| FLJ39609   | similar to hCG1995469                                                                                        | A_24_P940999 | 1.5 | 1.8E-06 |
| COL3A1     | collagen, type III, alpha 1                                                                                  | A_32_P226656 | 1.5 | 2.4E-02 |
| KIRREL2    | kin of IRRE like 2 (Drosophila)                                                                              | A_23_P315451 | 1.5 | 4.1E-05 |
| LXN        | latexin                                                                                                      | A_23_P6674   | 1.5 | 4.9E-06 |
| STEAP2     | six transmembrane epithelial antigen of the prostate 2                                                       | A_23_P428260 | 1.5 | 1.2E-08 |
| SRSF12     | serine/arginine-rich splicing factor 12                                                                      | A_23_P110903 | 1.5 | 1.4E-04 |
| FOXC1      | forkhead box C1                                                                                              | A_23_P390504 | 1.5 | 1.2E-04 |
| CRISPLD1   | cysteine-rich secretory protein LCCL domain containing 1                                                     | A_23_P59960  | 1.5 | 2.4E-07 |
| HRH1       | histamine receptor H1                                                                                        | A_24_P277211 | 1.5 | 2.2E-07 |
| ITK        | IL2-inducible T-cell kinase                                                                                  | A_23_P354151 | 1.5 | 9.8E-04 |
| LMF1       | lipase maturation factor 1                                                                                   | A_24_P930963 | 1.5 | 5.7E-06 |
| CD6        | CD6 molecule                                                                                                 | A_23_P311875 | 1.5 | 1.8E-05 |
| MYH2       | myosin, heavy chain 2, skeletal muscle, adult                                                                | A_23_P38271  | 1.5 | 1.1E-02 |
| SLC6A1     | solute carrier family 6 (neurotransmitter transporter, GABA), member 1                                       | A_24_P268685 | 1.5 | 1.6E-02 |
| SLFN13     | schlafen family member 13                                                                                    | A_23_P301105 | 1.5 | 2.1E-04 |
| MEG3       | maternally expressed 3 (non-protein coding)                                                                  | A_24_P737660 | 1.5 | 9.1E-03 |
| CXCR3      | chemokine (C-X-C motif) receptor 3                                                                           | A_23_P114299 | 1.5 | 3.3E-07 |
| CXCL10     | chemokine (C-X-C motif) ligand 10                                                                            | A_24_P303091 | 1.5 | 2.6E-03 |
| CD3G       | CD3g molecule, gamma (CD3-TCR complex)                                                                       | A_23_P98410  | 1.5 | 4.5E-06 |
| SYT12      | synaptotagmin XII                                                                                            | A_23_P421306 | 1.5 | 3.4E-06 |
| C7orf63    | chromosome 7 open reading frame 63                                                                           | A_23_P8653   | 1.5 | 7.1E-05 |

|              |                                                                     |              |     |         |
|--------------|---------------------------------------------------------------------|--------------|-----|---------|
| FGF14        | fibroblast growth factor 14                                         | A_23_P88033  | 1.5 | 2.5E-02 |
| CD79A        | CD79a molecule, immunoglobulin-associated alpha                     | A_23_P107735 | 1.5 | 4.2E-03 |
| APLN         | apelin                                                              | A_23_P113393 | 1.4 | 2.9E-02 |
| SMO          | smoothened homolog (Drosophila)                                     | A_23_P70818  | 1.4 | 2.8E-09 |
| KLK8         | kallikrein-related peptidase 8                                      | A_23_P369343 | 1.4 | 2.1E-02 |
| BIRC3        | baculoviral IAP repeat containing 3                                 | A_23_P98350  | 1.4 | 3.0E-07 |
| OSR2         | odd-skipped related 2 (Drosophila)                                  | A_23_P71570  | 1.4 | 8.3E-04 |
| FAM101A      | family with sequence similarity 101, member A                       | A_32_P200697 | 1.4 | 5.3E-03 |
| CD27         | CD27 molecule                                                       | A_23_P48088  | 1.4 | 3.4E-05 |
| FCRL2        | Fc receptor-like 2                                                  | A_23_P160751 | 1.4 | 1.7E-02 |
| RIMS2        | regulating synaptic membrane exocytosis 2                           | A_23_P147786 | 1.4 | 9.5E-04 |
| C6orf142     | chromosome 6 open reading frame 142                                 | A_23_P145555 | 1.4 | 4.6E-04 |
| BFSP2        | beaded filament structural protein 2, phakinin                      | A_23_P159316 | 1.4 | 1.3E-04 |
| RGS13        | regulator of G-protein signaling 13                                 | A_23_P500093 | 1.4 | 1.5E-02 |
| ZBP1         | Z-DNA binding protein 1                                             | A_23_P259141 | 1.4 | 3.3E-04 |
| VWCE         | von Willebrand factor C and EGF domains                             | A_23_P52986  | 1.4 | 3.2E-06 |
| DHRS9        | dehydrogenase/reductase (SDR family) member 9                       | A_23_P56559  | 1.4 | 2.4E-05 |
| KRT81        | keratin 81                                                          | A_23_P25187  | 1.4 | 1.7E-03 |
| GREM2        | gremlin 2                                                           | A_23_P329822 | 1.4 | 4.4E-03 |
| RBFOX1       | RNA binding protein, fox-1 homolog (C. elegans) 1                   | A_23_P140858 | 1.4 | 2.0E-03 |
| PRUNE2       | prune homolog 2 (Drosophila)                                        | A_32_P43746  | 1.4 | 4.8E-04 |
| ARL14        | ADP-ribosylation factor-like 14                                     | A_23_P92161  | 1.4 | 1.5E-03 |
| LOC100130741 | hypothetical protein LOC100130741                                   | A_24_P848126 | 1.4 | 1.3E-03 |
| CYP1B1       | cytochrome P450, family 1, subfamily B, polypeptide 1               | A_23_P209625 | 1.4 | 5.0E-04 |
| PPAPDC1B     | phosphatidic acid phosphatase type 2 domain containing 1B           | A_23_P329971 | 1.4 | 1.1E-06 |
| NTN1         | netrin 1                                                            | A_23_P15478  | 1.4 | 9.2E-04 |
| BCL11B       | B-cell CLL/lymphoma 11B (zinc finger protein)                       | A_23_P205738 | 1.4 | 1.5E-07 |
| ATF3         | activating transcription factor 3                                   | A_24_P33895  | 1.4 | 1.7E-02 |
| GADD45A      | growth arrest and DNA-damage-inducible, alpha                       | A_23_P23221  | 1.4 | 4.6E-07 |
| KCNA2        | potassium voltage-gated channel, shaker-related subfamily, member 2 | A_32_P40596  | 1.4 | 4.3E-04 |
| SOX11        | SRY (sex determining region Y)-box 11                               | A_24_P302584 | 1.4 | 2.4E-03 |
| PTGER1       | prostaglandin E receptor 1 (subtype EP1), 42kDa                     | A_23_P4808   | 1.4 | 2.2E-05 |
| CAPN13       | calpain 13                                                          | A_23_P101972 | 1.4 | 1.7E-02 |
| FLJ39632     | hypothetical LOC642477                                              | A_24_P788227 | 1.4 | 1.5E-04 |
| DKK1         | dickkopf homolog 1 (Xenopus laevis)                                 | A_23_P24129  | 1.4 | 4.9E-02 |
| CAPN6        | calpain 6                                                           | A_23_P217570 | 1.4 | 6.7E-04 |
| SMOC2        | SPARC related modular calcium binding 2                             | A_23_P70307  | 1.4 | 6.7E-04 |
| CD2          | CD2 molecule                                                        | A_23_P161076 | 1.4 | 8.3E-05 |
| FBLN2        | fibulin 2                                                           | A_23_P143981 | 1.4 | 1.7E-07 |
| TUBB2B       | tubulin, beta 2B                                                    | A_24_P314477 | 1.4 | 1.1E-05 |



|           |                                                                |              |     |         |
|-----------|----------------------------------------------------------------|--------------|-----|---------|
| INHBB     | inhibin, beta B                                                | A_23_P153964 | 1.4 | 4.4E-03 |
| CPA6      | carboxypeptidase A6                                            | A_23_P216291 | 1.4 | 4.1E-02 |
| IL1RAPL1  | interleukin 1 receptor accessory protein-like 1                | A_23_P84106  | 1.4 | 2.4E-04 |
| IL2RB     | interleukin 2 receptor, beta                                   | A_24_P203000 | 1.4 | 5.4E-05 |
| NMNAT2    | nicotinamide nucleotide adenylyltransferase 2                  | A_23_P345183 | 1.4 | 1.3E-03 |
| KCNE4     | potassium voltage-gated channel, Isk-related family, member 4  | A_23_P392575 | 1.4 | 3.8E-05 |
| LOC387895 | hypothetical LOC387895                                         | A_32_P35047  | 1.4 | 1.2E-02 |
| FAM55D    | family with sequence similarity 55, member D                   | A_23_P320216 | 1.4 | 1.8E-02 |
| NTS       | neurotensin                                                    | A_23_P36882  | 1.4 | 2.4E-02 |
| UBXN10    | UBX domain protein 10                                          | A_23_P85664  | 1.4 | 2.6E-03 |
| NTRK1     | neurotrophic tyrosine kinase, receptor, type 1                 | A_23_P34804  | 1.4 | 6.4E-04 |
| MIR155HG  | MIR155 host gene (non-protein coding)                          | A_32_P108156 | 1.4 | 2.1E-04 |
| GSTA3     | glutathione S-transferase alpha 3                              | A_23_P253495 | 1.4 | 2.0E-02 |
| P2RY6     | pyrimidnergic receptor P2Y, G-protein coupled, 6               | A_23_P64611  | 1.4 | 8.5E-07 |
| PTPN22    | protein tyrosine phosphatase, non-receptor type 22 (lymphoid)  | A_23_P149345 | 1.4 | 1.0E-04 |
| TNFRSF21  | tumor necrosis factor receptor superfamily, member 21          | A_23_P30666  | 1.4 | 7.9E-09 |
| DLG2      | discs, large homolog 2 (Drosophila)                            | A_23_P124514 | 1.4 | 1.3E-03 |
| PDE4B     | phosphodiesterase 4B, cAMP-specific                            | A_24_P325333 | 1.4 | 7.6E-04 |
| LOC641518 | hypothetical LOC641518                                         | A_24_P213788 | 1.4 | 1.2E-04 |
| MEI1      | meiosis inhibitor 1                                            | A_23_P211561 | 1.4 | 1.6E-04 |
| SPIB      | Spi-B transcription factor (Spi-1/PU.1 related)                | A_23_P39067  | 1.4 | 1.1E-04 |
| LAX1      | lymphocyte transmembrane adaptor 1                             | A_24_P370952 | 1.4 | 3.6E-02 |
| HTR2B     | 5-hydroxytryptamine (serotonin) receptor 2B                    | A_23_P16953  | 1.4 | 1.2E-03 |
| PLXNA4    | plexin A4                                                      | A_24_P265051 | 1.4 | 7.7E-04 |
| CFH       | complement factor H                                            | A_24_P273972 | 1.4 | 5.1E-06 |
| RALGPS2   | Ral GEF with PH domain and SH3 binding motif 2                 | A_24_P173746 | 1.4 | 2.4E-03 |
| CD70      | CD70 molecule                                                  | A_23_P119202 | 1.4 | 2.1E-06 |
| XCL1      | chemokine (C motif) ligand 1                                   | A_24_P45476  | 1.4 | 5.6E-04 |
| DNAJC12   | DnaJ (Hsp40) homolog, subfamily C, member 12                   | A_23_P127220 | 1.4 | 6.6E-04 |
| ATP8B4    | ATPase, class I, type 8B, member 4                             | A_23_P163216 | 1.4 | 6.4E-05 |
| DACT1     | dapper, antagonist of beta-catenin, homolog 1 (Xenopus laevis) | A_23_P65518  | 1.4 | 1.3E-06 |
| PMCH      | pro-melanin-concentrating hormone                              | A_23_P321223 | 1.4 | 2.8E-03 |
| PROM2     | prominin 2                                                     | A_23_P154358 | 1.4 | 4.0E-05 |
| PKIB      | protein kinase (cAMP-dependent, catalytic) inhibitor beta      | A_23_P145529 | 1.4 | 5.1E-04 |
| KCNJ5     | potassium inwardly-rectifying channel, subfamily J, member 5   | A_24_P309521 | 1.4 | 1.4E-02 |
| STYK1     | serine/threonine/tyrosine kinase 1                             | A_23_P13822  | 1.4 | 1.1E-06 |
| OVOS2     | ovostatin 2                                                    | A_23_P25069  | 1.3 | 1.0E-04 |
| PDE7B     | phosphodiesterase 7B                                           | A_23_P59338  | 1.3 | 3.4E-05 |
| PHYHIP    | phytanoyl-CoA 2-hydroxylase interacting protein                | A_23_P433229 | 1.3 | 1.4E-04 |

|           |                                                              |              |     |         |
|-----------|--------------------------------------------------------------|--------------|-----|---------|
| IGSF9     | immunoglobulin superfamily, member 9                         | A_23_P85441  | 1.3 | 2.4E-05 |
| SERPINB13 | serpin peptidase inhibitor, clade B (ovalbumin), member 13   | A_23_P432978 | 1.3 | 4.6E-02 |
| IGFBP4    | insulin-like growth factor binding protein 4                 | A_24_P382187 | 1.3 | 2.0E-05 |
| CKAP2     | cytoskeleton associated protein 2                            | A_24_P510357 | 1.3 | 7.2E-04 |
| KCTD8     | potassium channel tetramerisation domain containing 8        | A_23_P94902  | 1.3 | 1.7E-02 |
| SAA3P     | serum amyloid A3 pseudogene                                  | A_24_P556318 | 1.3 | 1.8E-03 |
| DFNA5     | deafness, autosomal dominant 5                               | A_23_P82449  | 1.3 | 4.0E-06 |
| SLC47A2   | solute carrier family 47, member 2                           | A_23_P77908  | 1.3 | 1.2E-02 |
| TAGAP     | T-cell activation RhoGTPase activating protein               | A_23_P339588 | 1.3 | 5.6E-03 |
| DNAJC22   | DnaJ (Hsp40) homolog, subfamily C, member 22                 | A_23_P253661 | 1.3 | 2.2E-07 |
| TSPAN2    | tetraspanin 2                                                | A_24_P62659  | 1.3 | 6.2E-03 |
| MGC16075  | hypothetical protein MGC16075                                | A_24_P120734 | 1.3 | 4.9E-03 |
| ELMOD1    | ELMO/CED-12 domain containing 1                              | A_23_P401774 | 1.3 | 9.7E-03 |
| TMEM155   | transmembrane protein 155                                    | A_23_P408195 | 1.3 | 2.4E-05 |
| SEPT1     | septin 1                                                     | A_23_P21057  | 1.3 | 3.7E-04 |
| SOX4      | SRY (sex determining region Y)-box 4                         | A_23_P82169  | 1.3 | 7.2E-08 |
| CCL8      | chemokine (C-C motif) ligand 8                               | A_23_P207456 | 1.3 | 1.7E-02 |
| PHLDA2    | pleckstrin homology-like domain, family A, member 2          | A_32_P174121 | 1.3 | 1.2E-03 |
| MFAP2     | microfibrillar-associated protein 2                          | A_23_P1029   | 1.3 | 1.8E-04 |
| IL24      | interleukin 24                                               | A_23_P51951  | 1.3 | 1.5E-03 |
| ANKRD22   | ankyrin repeat domain 22                                     | A_23_P161428 | 1.3 | 1.3E-02 |
| CCDC146   | coiled-coil domain containing 146                            | A_23_P168771 | 1.3 | 1.2E-02 |
| FLNC      | filamin C, gamma                                             | A_24_P77968  | 1.3 | 2.7E-04 |
| NAT8L     | N-acetyltransferase 8-like (GCN5-related, putative)          | A_24_P91991  | 1.3 | 2.6E-04 |
| MCTP1     | multiple C2 domains, transmembrane 1                         | A_23_P133293 | 1.3 | 1.4E-02 |
| IL1B      | interleukin 1, beta                                          | A_23_P79518  | 1.3 | 1.5E-02 |
| LAG3      | lymphocyte-activation gene 3                                 | A_23_P116942 | 1.3 | 2.8E-06 |
| PSD3      | pleckstrin and Sec7 domain containing 3                      | A_24_P18146  | 1.3 | 2.0E-10 |
| NCS1      | neuronal calcium sensor 1                                    | A_23_P217049 | 1.3 | 1.5E-05 |
| MEX3A     | mex-3 homolog A (C. elegans)                                 | A_24_P857404 | 1.3 | 1.1E-07 |
| TNFSF11   | tumor necrosis factor (ligand) superfamily, member 11        | A_23_P99386  | 1.3 | 1.4E-04 |
| STAP1     | signal transducing adaptor family member 1                   | A_23_P7185   | 1.3 | 3.9E-02 |
| PLA2G2A   | phospholipase A2, group IIA (platelets, synovial fluid)      | A_23_P321949 | 1.3 | 3.2E-02 |
| CTSE      | cathepsin E                                                  | A_23_P10291  | 1.3 | 1.7E-04 |
| TMEM156   | transmembrane protein 156                                    | A_23_P92334  | 1.3 | 3.1E-03 |
| SULF2     | sulfatase 2                                                  | A_23_P154605 | 1.3 | 8.3E-07 |
| ST8SIA4   | ST8 alpha-N-acetyl-neuraminide alpha-2,8-sialyltransferase 4 | A_23_P361984 | 1.3 | 2.5E-07 |
| FOSL1     | FOS-like antigen 1                                           | A_23_P322519 | 1.3 | 2.4E-02 |
| LCK       | lymphocyte-specific protein tyrosine kinase                  | A_23_P103361 | 1.3 | 1.1E-04 |

|              |                                                                                         |              |     |         |
|--------------|-----------------------------------------------------------------------------------------|--------------|-----|---------|
| FJX1         | four jointed box 1 (Drosophila)                                                         | A_23_P150693 | 1.3 | 2.8E-05 |
| SMPD3        | sphingomyelin phosphodiesterase 3, neutral membrane (neutral sphingomyelinase II)       | A_23_P163567 | 1.3 | 7.1E-04 |
| LOC100128239 | hypothetical LOC100128239                                                               | A_32_P115438 | 1.3 | 1.2E-03 |
| HBA2         | hemoglobin, alpha 2                                                                     | A_24_P142305 | 1.3 | 4.6E-02 |
| C20orf114    | chromosome 20 open reading frame 114                                                    | A_23_P154784 | 1.3 | 4.9E-02 |
| DEPDC7       | DEP domain containing 7                                                                 | A_23_P385126 | 1.3 | 7.9E-06 |
| CXCL3        | chemokine (C-X-C motif) ligand 3                                                        | A_24_P183150 | 1.3 | 3.4E-03 |
| C1orf54      | chromosome 1 open reading frame 54                                                      | A_23_P74778  | 1.3 | 1.3E-09 |
| FRZB         | frizzled-related protein                                                                | A_23_P10902  | 1.3 | 1.4E-04 |
| SKAP1        | src kinase associated phosphoprotein 1                                                  | A_23_P100730 | 1.3 | 9.7E-07 |
| RHOH         | ras homolog gene family, member H                                                       | A_23_P58132  | 1.3 | 1.5E-05 |
| SPINK5       | serine peptidase inhibitor, Kazal type 5                                                | A_23_P356494 | 1.3 | 1.1E-02 |
| ABL2         | v-abl Abelson murine leukemia viral oncogene homolog 2                                  | A_23_P138099 | 1.3 | 2.2E-04 |
| LMAN1        | lectin, mannose-binding, 1                                                              | A_23_P78342  | 1.3 | 4.6E-04 |
| GPR183       | G protein-coupled receptor 183                                                          | A_23_P25566  | 1.3 | 1.6E-03 |
| NGFR         | nerve growth factor receptor                                                            | A_23_P389897 | 1.3 | 5.0E-06 |
| SLC26A4      | solute carrier family 26, member 4                                                      | A_23_P331560 | 1.3 | 4.2E-03 |
| XG           | Xg blood group                                                                          | A_23_P72487  | 1.3 | 3.1E-02 |
| BATF         | basic leucine zipper transcription factor, ATF-like                                     | A_23_P128974 | 1.3 | 2.8E-05 |
| RBP5         | retinol binding protein 5, cellular                                                     | A_24_P386746 | 1.3 | 1.2E-07 |
| GFI1         | growth factor independent 1 transcription repressor                                     | A_23_P257365 | 1.3 | 2.7E-04 |
| PGM2L1       | phosphoglucomutase 2-like 1                                                             | A_23_P396765 | 1.3 | 3.8E-07 |
| C3orf32      | chromosome 3 open reading frame 32                                                      | A_23_P144005 | 1.3 | 1.2E-04 |
| MTTP         | microsomal triglyceride transfer protein                                                | A_23_P213171 | 1.3 | 3.0E-04 |
| HBD          | hemoglobin, delta                                                                       | A_24_P75190  | 1.3 | 2.2E-02 |
| GBP5         | guanylate binding protein 5                                                             | A_23_P74290  | 1.3 | 5.5E-03 |
| HOXC9        | homeobox C9                                                                             | A_23_P25150  | 1.3 | 4.0E-02 |
| BMP7         | bone morphogenetic protein 7                                                            | A_23_P68487  | 1.3 | 4.8E-06 |
| PPAP2C       | phosphatidic acid phosphatase type 2C                                                   | A_23_P108294 | 1.3 | 1.9E-03 |
| SHISA6       | shisa homolog 6 (Xenopus laevis)                                                        | A_23_P411542 | 1.3 | 8.3E-03 |
| C4B          | complement component 4B (Chido blood group)                                             | A_23_P42282  | 1.3 | 3.1E-05 |
| PRDM1        | PR domain containing 1, with ZNF domain                                                 | A_23_P350451 | 1.3 | 3.6E-03 |
| TLL2         | tolloid-like 2                                                                          | A_23_P404778 | 1.3 | 3.5E-06 |
| SNCAIP       | synuclein, alpha interacting protein                                                    | A_23_P19020  | 1.3 | 2.4E-04 |
| GDF6         | growth differentiation factor 6                                                         | A_32_P140489 | 1.3 | 1.1E-02 |
| HIF1A        | hypoxia inducible factor 1, alpha subunit (basic helix-loop-helix transcription factor) | A_24_P56388  | 1.3 | 2.5E-05 |
| TCL1A        | T-cell leukemia/lymphoma 1A                                                             | A_23_P357717 | 1.3 | 1.9E-02 |
| SLC27A2      | solute carrier family 27 (fatty acid transporter), member 2                             | A_23_P140450 | 1.3 | 1.3E-02 |
| ACCN2        | amiloride-sensitive cation channel 2, neuronal                                          | A_23_P204751 | 1.3 | 9.4E-06 |

|          |                                                                                                           |              |     |         |
|----------|-----------------------------------------------------------------------------------------------------------|--------------|-----|---------|
| DIRAS3   | DIRAS family, GTP-binding RAS-like 3                                                                      | A_23_P149121 | 1.3 | 7.1E-04 |
| LTBP2    | latent transforming growth factor beta binding protein 2                                                  | A_23_P405129 | 1.3 | 2.9E-05 |
| RAB7B    | RAB7B, member RAS oncogene family                                                                         | A_23_P61590  | 1.3 | 4.4E-04 |
| NFKBIE   | nuclear factor of kappa light polypeptide gene enhancer in B-cells inhibitor, epsilon                     | A_23_P30655  | 1.3 | 4.0E-08 |
| FANK1    | fibronectin type III and ankyrin repeat domains 1                                                         | A_23_P115785 | 1.3 | 2.0E-02 |
| GAD1     | glutamate decarboxylase 1 (brain, 67kDa)                                                                  | A_23_P374689 | 1.3 | 3.6E-03 |
| PDCD1    | programmed cell death 1                                                                                   | A_23_P136405 | 1.3 | 2.1E-05 |
| CD200R1  | CD200 receptor 1                                                                                          | A_23_P41217  | 1.3 | 1.6E-02 |
| ASB5     | ankyrin repeat and SOCS box containing 5                                                                  | A_23_P144326 | 1.3 | 9.3E-03 |
| KIAA1045 | KIAA1045                                                                                                  | A_23_P319232 | 1.3 | 3.9E-03 |
| WSCD2    | WSC domain containing 2                                                                                   | A_23_P305914 | 1.3 | 1.2E-03 |
| PTPRN2   | protein tyrosine phosphatase, receptor type, N polypeptide 2                                              | A_32_P66804  | 1.3 | 4.9E-05 |
| RAMP1    | receptor (G protein-coupled) activity modifying protein 1                                                 | A_23_P50946  | 1.3 | 1.1E-04 |
| MRV1     | murine retrovirus integration site 1 homolog                                                              | A_23_P161837 | 1.3 | 4.3E-04 |
| BEND6    | BEN domain containing 6                                                                                   | A_23_P310086 | 1.3 | 1.5E-03 |
| ESR2     | estrogen receptor 2 (ER beta)                                                                             | A_23_P54100  | 1.3 | 2.9E-05 |
| OGN      | osteoglycin                                                                                               | A_23_P82990  | 1.3 | 4.8E-03 |
| PLEKHA4  | pleckstrin homology domain containing, family A (phosphoinositide binding specific) member 4              | A_24_P408047 | 1.3 | 4.1E-09 |
| DDIT4L   | DNA-damage-inducible transcript 4-like                                                                    | A_23_P302672 | 1.2 | 1.6E-02 |
| PPFIA2   | protein tyrosine phosphatase, receptor type, f polypeptide (PTPRF), interacting protein (liprin), alpha 2 | A_23_P402936 | 1.2 | 3.8E-04 |
| TAC1     | tachykinin, precursor 1                                                                                   | A_23_P215283 | 1.2 | 3.9E-02 |
| APLNR    | apelin receptor                                                                                           | A_23_P318860 | 1.2 | 5.8E-04 |
| CCND2    | cyclin D2                                                                                                 | A_23_P139881 | 1.2 | 1.7E-05 |
| TNC      | tenascin C                                                                                                | A_24_P924504 | 1.2 | 3.3E-02 |
| CD8A     | CD8a molecule                                                                                             | A_32_P163247 | 1.2 | 5.9E-04 |
| CLMP     | CXADR-like membrane protein                                                                               | A_23_P35995  | 1.2 | 2.1E-04 |
| TRIB1    | tribbles homolog 1 (Drosophila)                                                                           | A_23_P123503 | 1.2 | 8.0E-03 |
| CD72     | CD72 molecule                                                                                             | A_23_P250245 | 1.2 | 9.2E-04 |
| MUC20    | mucin 20, cell surface associated                                                                         | A_23_P92222  | 1.2 | 1.7E-03 |
| ROR2     | receptor tyrosine kinase-like orphan receptor 2                                                           | A_23_P158318 | 1.2 | 1.2E-06 |
| LY9      | lymphocyte antigen 9                                                                                      | A_24_P324674 | 1.2 | 1.3E-05 |
| FAM133A  | family with sequence similarity 133, member A                                                             | A_24_P400027 | 1.2 | 6.5E-03 |
| ZFP42    | zinc finger protein 42 homolog (mouse)                                                                    | A_23_P395582 | 1.2 | 1.6E-02 |
| MIAT     | myocardial infarction associated transcript (non-protein coding)                                          | A_24_P899928 | 1.2 | 2.8E-02 |
| CKM      | creatine kinase, muscle                                                                                   | A_23_P50250  | 1.2 | 1.5E-03 |
| NKX6-2   | NK6 homeobox 2                                                                                            | A_23_P86587  | 1.2 | 2.4E-02 |
| C18orf56 | chromosome 18 open reading frame 56                                                                       | A_24_P238499 | 1.2 | 7.1E-03 |

|                 |                                                                              |              |     |         |
|-----------------|------------------------------------------------------------------------------|--------------|-----|---------|
| HS6ST3          | heparan sulfate 6-O-sulfotransferase 3                                       | A_23_P422911 | 1.2 | 8.5E-03 |
| KRT13           | keratin 13                                                                   | A_24_P228149 | 1.2 | 2.1E-02 |
| TRIM2           | tripartite motif containing 2                                                | A_24_P208909 | 1.2 | 2.1E-06 |
| LIMS3-LOC440895 | LIMS3-LOC440895 readthrough                                                  | A_24_P527716 | 1.2 | 1.2E-02 |
| SLC2A1          | solute carrier family 2 (facilitated glucose transporter), member 1          | A_23_P571    | 1.2 | 2.6E-04 |
| SPINK6          | serine peptidase inhibitor, Kazal type 6                                     | A_23_P92909  | 1.2 | 3.6E-03 |
| KIF19           | kinesin family member 19                                                     | A_23_P404016 | 1.2 | 1.4E-02 |
| ITGA2           | integrin, alpha 2 (CD49B, alpha 2 subunit of VLA-2 receptor)                 | A_24_P243329 | 1.2 | 7.2E-03 |
| WDR64           | WD repeat domain 64                                                          | A_23_P399116 | 1.2 | 2.9E-03 |
| FAM46C          | family with sequence similarity 46, member C                                 | A_23_P137751 | 1.2 | 4.0E-03 |
| PHF21B          | PHD finger protein 21B                                                       | A_24_P113572 | 1.2 | 1.4E-03 |
| FREM1           | FRAS1 related extracellular matrix 1                                         | A_23_P43337  | 1.2 | 2.4E-04 |
| MYCN            | v-myc myelocytomatosis viral related oncogene, neuroblastoma derived (avian) | A_24_P94402  | 1.2 | 7.5E-03 |
| WDR16           | WD repeat domain 16                                                          | A_23_P4074   | 1.2 | 4.7E-02 |
| CNN1            | calponin 1, basic, smooth muscle                                             | A_23_P125233 | 1.2 | 1.1E-03 |
| SOX2OT          | SOX2 overlapping transcript (non-protein coding)                             | A_24_P756289 | 1.2 | 1.8E-02 |
| LMNB1           | lamin B1                                                                     | A_23_P258493 | 1.2 | 8.3E-04 |
| VAT1L           | vesicle amine transport protein 1 homolog (T. californica)-like              | A_23_P400449 | 1.2 | 2.4E-03 |
| NRXN2           | neurexin 2                                                                   | A_24_P261470 | 1.2 | 3.4E-05 |
| MCHR1           | melanin-concentrating hormone receptor 1                                     | A_23_P211543 | 1.2 | 1.2E-02 |
| LOC646976       | hypothetical LOC646976                                                       | A_24_P350546 | 1.2 | 2.8E-02 |
| BCL11A          | B-cell CLL/lymphoma 11A (zinc finger protein)                                | A_23_P218584 | 1.2 | 9.0E-04 |
| PAPPA           | pregnancy-associated plasma protein A, pappalysin 1                          | A_23_P351270 | 1.2 | 3.5E-05 |
| PDLIM3          | PDZ and LIM domain 3                                                         | A_23_P110403 | 1.2 | 4.8E-05 |
| UNC5CL          | unc-5 homolog C (C. elegans)-like                                            | A_23_P428298 | 1.2 | 6.5E-03 |
| PLK2            | polo-like kinase 2                                                           | A_23_P30254  | 1.2 | 9.2E-06 |
| COL8A2          | collagen, type VIII, alpha 2                                                 | A_24_P365975 | 1.2 | 2.6E-07 |
| TMC5            | transmembrane channel-like 5                                                 | A_23_P15101  | 1.2 | 2.2E-05 |
| BCHE            | butyrylcholinesterase                                                        | A_23_P212050 | 1.2 | 1.7E-03 |
| EPHB1           | EPH receptor B1                                                              | A_23_P166993 | 1.2 | 3.4E-03 |
| LYPD3           | LY6/PLAUR domain containing 3                                                | A_24_P48495  | 1.2 | 4.8E-04 |
| TNFSF13B        | tumor necrosis factor (ligand) superfamily, member 13b                       | A_23_P14174  | 1.2 | 5.4E-05 |
| C18orf1         | chromosome 18 open reading frame 1                                           | A_32_P96188  | 1.2 | 7.8E-03 |
| LOXL1           | lysyl oxidase-like 1                                                         | A_23_P124084 | 1.2 | 3.1E-05 |
| ZNF521          | zinc finger protein 521                                                      | A_23_P159027 | 1.2 | 1.6E-05 |
| AK4             | adenylate kinase 4                                                           | A_32_P108655 | 1.2 | 2.1E-03 |
| SUSD4           | sushi domain containing 4                                                    | A_24_P259607 | 1.2 | 2.9E-02 |
| LY75            | lymphocyte antigen 75                                                        | A_23_P334173 | 1.2 | 1.4E-05 |

|            |                                                                                                 |              |     |         |
|------------|-------------------------------------------------------------------------------------------------|--------------|-----|---------|
| FGF13      | fibroblast growth factor 13                                                                     | A_32_P41396  | 1.2 | 5.0E-04 |
| CFHR3      | complement factor H-related 3                                                                   | A_23_P103256 | 1.2 | 2.6E-05 |
| ETV7       | ets variant 7                                                                                   | A_23_P42353  | 1.2 | 1.8E-03 |
| LTBP1      | latent transforming growth factor beta binding protein 1                                        | A_23_P43810  | 1.2 | 3.7E-07 |
| ADAMTS4    | ADAM metalloproteinase with thrombospondin type 1 motif, 4                                      | A_23_P360754 | 1.2 | 2.9E-02 |
| ITGA4      | integrin, alpha 4 (antigen CD49D, alpha 4 subunit of VLA-4 receptor)                            | A_23_P56505  | 1.2 | 2.1E-05 |
| STAT4      | signal transducer and activator of transcription 4                                              | A_23_P305198 | 1.2 | 4.5E-02 |
| REEP2      | receptor accessory protein 2                                                                    | A_23_P19182  | 1.2 | 4.5E-05 |
| NLRP7      | NLR family, pyrin domain containing 7                                                           | A_23_P16384  | 1.2 | 8.0E-04 |
| EFNB3      | ephrin-B3                                                                                       | A_24_P940006 | 1.2 | 5.9E-05 |
| TNFSF14    | tumor necrosis factor (ligand) superfamily, member 14                                           | A_24_P237036 | 1.2 | 7.0E-05 |
| PTPN7      | protein tyrosine phosphatase, non-receptor type 7                                               | A_23_P201778 | 1.2 | 4.9E-05 |
| ACHE       | acetylcholinesterase                                                                            | A_24_P60845  | 1.2 | 2.6E-03 |
| TMEM217    | transmembrane protein 217                                                                       | A_23_P334870 | 1.2 | 6.4E-04 |
| CYR61      | cysteine-rich, angiogenic inducer, 61                                                           | A_23_P46426  | 1.2 | 1.6E-02 |
| GZMK       | granzyme K (granzyme 3; tryptase II)                                                            | A_23_P156218 | 1.2 | 5.1E-04 |
| CUX2       | cut-like homeobox 2                                                                             | A_23_P2543   | 1.2 | 1.0E-02 |
| TNFRSF13B  | tumor necrosis factor receptor superfamily, member 13B                                          | A_23_P84705  | 1.2 | 2.5E-02 |
| LOC283174  | hypothetical LOC283174                                                                          | A_32_P63013  | 1.2 | 1.8E-03 |
| BACE2      | beta-site APP-cleaving enzyme 2                                                                 | A_23_P154875 | 1.2 | 2.0E-06 |
| MLLT11     | myeloid/lymphoid or mixed-lineage leukemia (trithorax homolog, Drosophila); translocated to, 11 | A_23_P23346  | 1.2 | 5.7E-05 |
| SPRR2D     | small proline-rich protein 2D                                                                   | A_23_P11644  | 1.2 | 1.9E-03 |
| KCNN3      | potassium intermediate/small conductance calcium-activated channel, subfamily N, member 3       | A_23_P126167 | 1.2 | 6.9E-05 |
| NLGN3      | neuroligin 3                                                                                    | A_23_P62298  | 1.2 | 2.0E-05 |
| ITGA7      | integrin, alpha 7                                                                               | A_23_P128084 | 1.2 | 8.0E-04 |
| SOCS3      | suppressor of cytokine signaling 3                                                              | A_23_P207058 | 1.2 | 1.7E-02 |
| LRGUK      | leucine-rich repeats and guanylate kinase domain containing                                     | A_24_P346517 | 1.2 | 3.1E-02 |
| BCAS1      | breast carcinoma amplified sequence 1                                                           | A_23_P17420  | 1.1 | 1.9E-02 |
| PLEKHN1    | pleckstrin homology domain containing, family N member 1                                        | A_23_P23616  | 1.1 | 4.4E-04 |
| RGS22      | regulator of G-protein signaling 22                                                             | A_32_P125771 | 1.1 | 3.4E-02 |
| ARL4C      | ADP-ribosylation factor-like 4C                                                                 | A_23_P317620 | 1.1 | 3.9E-06 |
| ROBO2      | roundabout, axon guidance receptor, homolog 2 (Drosophila)                                      | A_24_P180151 | 1.1 | 4.2E-02 |
| TRPV4      | transient receptor potential cation channel, subfamily V, member 4                              | A_24_P13381  | 1.1 | 3.3E-03 |
| ANKRD36BP2 | ankyrin repeat domain 36B pseudogene 2                                                          | A_24_P341089 | 1.1 | 1.2E-03 |
| SLC45A3    | solute carrier family 45, member 3                                                              | A_24_P208345 | 1.1 | 5.8E-05 |
| ADAM12     | ADAM metalloproteinase domain 12                                                                | A_23_P202327 | 1.1 | 1.8E-04 |

|           |                                                                   |              |     |         |
|-----------|-------------------------------------------------------------------|--------------|-----|---------|
| NNMT      | nicotinamide N-methyltransferase                                  | A_23_P127584 | 1.1 | 6.6E-04 |
| CD79B     | CD79b molecule, immunoglobulin-associated beta                    | A_23_P207201 | 1.1 | 2.2E-03 |
| TSPAN1    | tetraspanin 1                                                     | A_23_P160167 | 1.1 | 1.1E-02 |
| BAI2      | brain-specific angiogenesis inhibitor 2                           | A_23_P149019 | 1.1 | 4.8E-07 |
| CD1B      | CD1b molecule                                                     | A_23_P351844 | 1.1 | 1.5E-02 |
| PTH LH    | parathyroid hormone-like hormone                                  | A_23_P2271   | 1.1 | 6.8E-05 |
| ENPP3     | ectonucleotide pyrophosphatase/phosphodiesterase 3                | A_23_P404536 | 1.1 | 5.7E-05 |
| CTLA4     | cytotoxic T-lymphocyte-associated protein 4                       | A_23_P102481 | 1.1 | 2.5E-03 |
| FAM171B   | family with sequence similarity 171, member B                     | A_32_P202759 | 1.1 | 9.9E-04 |
| LOC285957 | hypothetical protein LOC285957                                    | A_32_P41551  | 1.1 | 1.0E-02 |
| GCKR      | glucokinase (hexokinase 4) regulator                              | A_23_P119886 | 1.1 | 3.7E-03 |
| FAM74A4   | family with sequence similarity 74, member A4                     | A_24_P606083 | 1.1 | 1.3E-02 |
| ROBO1     | roundabout, axon guidance receptor, homolog 1 (Drosophila)        | A_24_P77432  | 1.1 | 1.4E-08 |
| HPSE2     | heparanase 2                                                      | A_24_P103893 | 1.1 | 3.0E-02 |
| NKAIN2    | Na <sup>+</sup> /K <sup>+</sup> transporting ATPase interacting 2 | A_23_P316501 | 1.1 | 6.7E-03 |
| BIK       | BCL2-interacting killer (apoptosis-inducing)                      | A_23_P404667 | 1.1 | 1.8E-03 |
| IL23A     | interleukin 23, alpha subunit p19                                 | A_23_P76078  | 1.1 | 1.0E-05 |
| OXCT2     | 3-oxoacid CoA transferase 2                                       | A_23_P137896 | 1.1 | 8.0E-03 |
| EPHB3     | EPH receptor B3                                                   | A_23_P95060  | 1.1 | 2.1E-04 |
| SSPN      | sarcospan (Kras oncogene-associated gene)                         | A_23_P203920 | 1.1 | 2.7E-05 |
| LOC284454 | hypothetical LOC284454                                            | A_32_P444104 | 1.1 | 1.9E-02 |
| LOR       | loricrin                                                          | A_23_P34452  | 1.1 | 1.3E-02 |
| COX6B2    | cytochrome c oxidase subunit VIb polypeptide 2 (testis)           | A_24_P267523 | 1.1 | 1.3E-02 |
| PDIA4     | protein disulfide isomerase family A, member 4                    | A_32_P192804 | 1.1 | 2.2E-03 |
| DUSP2     | dual specificity phosphatase 2                                    | A_23_P108842 | 1.1 | 1.4E-04 |
| STAMBPL1  | STAM binding protein-like 1                                       | A_23_P385322 | 1.1 | 2.4E-05 |
| SCGB3A2   | secretoglobin, family 3A, member 2                                | A_23_P145006 | 1.1 | 5.2E-03 |
| FSIP1     | fibrous sheath interacting protein 1                              | A_23_P353125 | 1.1 | 1.1E-02 |
| IER5L     | immediate early response 5-like                                   | A_24_P383450 | 1.1 | 1.6E-06 |
| GLT8D2    | glycosyltransferase 8 domain containing 2                         | A_23_P48198  | 1.1 | 3.9E-05 |
| CCL13     | chemokine (C-C motif) ligand 13                                   | A_24_P125335 | 1.1 | 3.5E-02 |
| ACAP1     | ArfGAP with coiled-coil, ankyrin repeat and PH domains 1          | A_23_P107336 | 1.1 | 6.5E-04 |
| AGR2      | anterior gradient homolog 2 (Xenopus laevis)                      | A_23_P31407  | 1.1 | 4.6E-02 |
| ZMAT3     | zinc finger, matrin-type 3                                        | A_24_P639629 | 1.1 | 2.9E-05 |
| SPATA18   | spermatogenesis associated 18 homolog (rat)                       | A_23_P407112 | 1.1 | 5.5E-03 |
| DUSP10    | dual specificity phosphatase 10                                   | A_23_P51856  | 1.1 | 2.7E-07 |
| PVRL1     | poliovirus receptor-related 1 (herpesvirus entry mediator C)      | A_24_P50890  | 1.1 | 7.9E-07 |
| CATSPERB  | cation channel, sperm-associated, beta                            | A_23_P77043  | 1.1 | 2.1E-02 |
| PPIL4     | peptidylprolyl isomerase (cyclophilin)-like 4                     | A_24_P187826 | 1.1 | 8.1E-03 |

|          |                                                                               |              |     |         |
|----------|-------------------------------------------------------------------------------|--------------|-----|---------|
| TNFRSF18 | tumor necrosis factor receptor superfamily, member 18                         | A_24_P411121 | 1.1 | 1.3E-05 |
| CRYM     | crystallin, mu                                                                | A_23_P77731  | 1.1 | 1.6E-03 |
| ATP10B   | ATPase, class V, type 10B                                                     | A_23_P311901 | 1.1 | 7.1E-03 |
| PLXDC1   | plexin domain containing 1                                                    | A_32_P208823 | 1.1 | 3.6E-04 |
| MIA      | melanoma inhibitory activity                                                  | A_23_P4714   | 1.1 | 1.6E-02 |
| RGS5     | regulator of G-protein signaling 5                                            | A_23_P46045  | 1.1 | 2.2E-03 |
| CNTN3    | contactin 3 (plasmacytoma associated)                                         | A_24_P17490  | 1.1 | 3.1E-02 |
| COL6A3   | collagen, type VI, alpha 3                                                    | A_32_P156322 | 1.1 | 2.4E-02 |
| IL21R    | interleukin 21 receptor                                                       | A_24_P227927 | 1.1 | 3.0E-04 |
| WNT4     | wingless-type MMTV integration site family, member 4                          | A_23_P11787  | 1.1 | 4.2E-03 |
| BNC2     | basonuclin 2                                                                  | A_32_P133916 | 1.1 | 1.4E-05 |
| MGC11082 | hypothetical LOC84777                                                         | A_23_P164576 | 1.1 | 1.5E-04 |
| ASPHD2   | aspartate beta-hydroxylase domain containing 2                                | A_24_P245815 | 1.1 | 5.6E-06 |
| FKBP11   | FK506 binding protein 11, 19 kDa                                              | A_23_P25121  | 1.1 | 1.0E-03 |
| SLA2     | Src-like-adaptor 2                                                            | A_23_P143173 | 1.1 | 2.1E-02 |
| CST1     | cystatin SN                                                                   | A_23_P112859 | 1.1 | 8.2E-04 |
| JUNB     | jun B proto-oncogene                                                          | A_23_P4821   | 1.1 | 2.1E-03 |
| TMEM154  | transmembrane protein 154                                                     | A_23_P361584 | 1.1 | 2.0E-04 |
| PPP2R2B  | protein phosphatase 2, regulatory subunit B, beta                             | A_23_P213620 | 1.1 | 2.0E-06 |
| ACSL6    | acyl-CoA synthetase long-chain family member 6                                | A_23_P7562   | 1.1 | 1.1E-03 |
| BCL2L14  | BCL2-like 14 (apoptosis facilitator)                                          | A_23_P128050 | 1.1 | 3.5E-05 |
| PRTFDC1  | phosphoribosyl transferase domain containing 1                                | A_23_P202004 | 1.1 | 9.1E-06 |
| HLA-DPB1 | major histocompatibility complex, class II, DP beta 1                         | A_23_P258769 | 1.1 | 8.1E-03 |
| ADAM23   | ADAM metalloproteinase domain 23                                              | A_23_P351667 | 1.1 | 9.2E-04 |
| TRAF3IP3 | TRAF3 interacting protein 3                                                   | A_23_P334414 | 1.1 | 1.6E-03 |
| CLDN14   | claudin 14                                                                    | A_23_P91512  | 1.1 | 3.2E-03 |
| ZNF826P  | zinc finger protein 826, pseudogene                                           | A_24_P921554 | 1.1 | 1.7E-02 |
| TP53INP1 | tumor protein p53 inducible nuclear protein 1                                 | A_23_P168882 | 1.1 | 2.5E-04 |
| COL1A2   | collagen, type I, alpha 2                                                     | A_24_P277934 | 1.1 | 4.9E-03 |
| SFN      | stratifin                                                                     | A_23_P63254  | 1.1 | 6.5E-04 |
| WT1      | Wilms tumor 1                                                                 | A_23_P116280 | 1.1 | 1.5E-02 |
| MACC1    | metastasis associated in colon cancer 1                                       | A_32_P131031 | 1.1 | 1.4E-05 |
| WFIKKN2  | WAP, follistatin/kazal, immunoglobulin, kunitz and netrin domain containing 2 | A_24_P399230 | 1.1 | 2.7E-04 |
| STMN3    | stathmin-like 3                                                               | A_23_P165927 | 1.1 | 6.2E-08 |
| XCL2     | chemokine (C motif) ligand 2                                                  | A_23_P51534  | 1.1 | 1.0E-02 |
| FGF18    | fibroblast growth factor 18                                                   | A_23_P93027  | 1.1 | 1.1E-04 |
| ANGPTL2  | angiopoietin-like 2                                                           | A_23_P20864  | 1.1 | 6.8E-05 |
| FASLG    | Fas ligand (TNF superfamily, member 6)                                        | A_23_P369815 | 1.1 | 4.2E-02 |
| ABHD12B  | abhydrolase domain containing 12B                                             | A_23_P366035 | 1.1 | 7.9E-03 |
| RUNX1    | runt-related transcription factor 1                                           | A_24_P96403  | 1.1 | 1.5E-09 |



|          |                                                                               |              |     |         |
|----------|-------------------------------------------------------------------------------|--------------|-----|---------|
| DIEXF    | digestive organ expansion factor homolog (zebrafish)                          | A_23_P34953  | 1.1 | 3.4E-02 |
| AMPD3    | adenosine monophosphate deaminase 3                                           | A_24_P304154 | 1.1 | 2.6E-05 |
| CPE      | carboxypeptidase E                                                            | A_23_P259442 | 1.1 | 3.6E-05 |
| PXDNL    | peroxidasin homolog (Drosophila)-like                                         | A_23_P258310 | 1.1 | 1.2E-03 |
| SPINK13  | serine peptidase inhibitor, Kazal type 13 (putative)                          | A_23_P58706  | 1.1 | 3.7E-02 |
| PGBD5    | piggyBac transposable element derived 5                                       | A_23_P126649 | 1.1 | 2.2E-02 |
| ITM2C    | integral membrane protein 2C                                                  | A_24_P402690 | 1.1 | 5.4E-05 |
| CHSY1    | chondroitin sulfate synthase 1                                                | A_23_P37484  | 1.1 | 4.8E-05 |
| HMGB3P1  | high-mobility group box 3 pseudogene 1                                        | A_23_P373119 | 1.1 | 4.7E-03 |
| KIAA1143 | KIAA1143                                                                      | A_32_P11701  | 1.1 | 3.1E-03 |
| NGEF     | neuronal guanine nucleotide exchange factor                                   | A_23_P102364 | 1.1 | 2.3E-03 |
| COL5A2   | collagen, type V, alpha 2                                                     | A_23_P33196  | 1.1 | 1.2E-02 |
| CPXM1    | carboxypeptidase X (M14 family), member 1                                     | A_23_P6066   | 1.0 | 2.7E-03 |
| SLC41A2  | solute carrier family 41, member 2                                            | A_23_P204801 | 1.0 | 2.3E-04 |
| OVOL1    | ovo-like 1(Drosophila)                                                        | A_23_P202810 | 1.0 | 6.2E-04 |
| HS3ST1   | heparan sulfate (glucosamine) 3-O-sulfotransferase 1                          | A_23_P121657 | 1.0 | 1.4E-02 |
| TPBG     | trophoblast glycoprotein                                                      | A_23_P59261  | 1.0 | 1.5E-07 |
| FAM5C    | family with sequence similarity 5, member C                                   | A_23_P103812 | 1.0 | 1.5E-04 |
| CFI      | complement factor I                                                           | A_24_P92472  | 1.0 | 6.1E-07 |
| IL20     | interleukin 20                                                                | A_23_P46482  | 1.0 | 1.0E-02 |
| AEN      | apoptosis enhancing nuclease                                                  | A_32_P85230  | 1.0 | 6.3E-06 |
| SPRY1    | sprouty homolog 1, antagonist of FGF signaling (Drosophila)                   | A_23_P144476 | 1.0 | 1.4E-05 |
| IQCG     | IQ motif containing G                                                         | A_23_P300070 | 1.0 | 4.7E-02 |
| GLB1L3   | galactosidase, beta 1-like 3                                                  | A_32_P741851 | 1.0 | 1.3E-02 |
| CLDN2    | claudin 2                                                                     | A_23_P394947 | 1.0 | 3.5E-02 |
| APOE     | apolipoprotein E                                                              | A_23_P164650 | 1.0 | 7.7E-03 |
| RAB27B   | RAB27B, member RAS oncogene family                                            | A_23_P107612 | 1.0 | 1.6E-02 |
| MAGED4B  | melanoma antigen family D, 4B                                                 | A_23_P159907 | 1.0 | 1.2E-04 |
| PRR7     | proline rich 7 (synaptic)                                                     | A_23_P30464  | 1.0 | 5.3E-05 |
| ANO1     | anoctamin 1, calcium activated chloride channel                               | A_24_P87036  | 1.0 | 1.9E-03 |
| DTX1     | deltex homolog 1 (Drosophila)                                                 | A_24_P290751 | 1.0 | 5.2E-05 |
| SFRP1    | secreted frizzled-related protein 1                                           | A_23_P10127  | 1.0 | 1.6E-02 |
| SLC22A4  | solute carrier family 22 (organic cation/ergothioneine transporter), member 4 | A_23_P156180 | 1.0 | 4.8E-02 |
| PMAIP1   | phorbol-12-myristate-13-acetate-induced protein 1                             | A_23_P207999 | 1.0 | 6.5E-06 |
| GPR171   | G protein-coupled receptor 171                                                | A_23_P253317 | 1.0 | 9.4E-03 |
| SHOX2    | short stature homeobox 2                                                      | A_24_P300021 | 1.0 | 6.1E-03 |
| FAM124A  | family with sequence similarity 124A                                          | A_24_P239538 | 1.0 | 3.2E-03 |
| HOXB8    | homeobox B8                                                                   | A_23_P370588 | 1.0 | 1.7E-02 |
| NELL1    | NEL-like 1 (chicken)                                                          | A_23_P251151 | 1.0 | 1.1E-03 |

|              |                                                                                                |              |     |         |
|--------------|------------------------------------------------------------------------------------------------|--------------|-----|---------|
| HEPACAM      | hepatic and glial cell adhesion molecule                                                       | A_24_P213944 | 1.0 | 1.3E-02 |
| CNGA1        | cyclic nucleotide gated channel alpha 1                                                        | A_23_P92536  | 1.0 | 1.7E-02 |
| VSNL1        | visinin-like 1                                                                                 | A_23_P209978 | 1.0 | 8.8E-03 |
| TLR10        | toll-like receptor 10                                                                          | A_23_P33420  | 1.0 | 1.1E-02 |
| CLEC4G       | C-type lectin domain family 4, member G                                                        | A_23_P153390 | 1.0 | 4.3E-02 |
| TMEM200A     | transmembrane protein 200A                                                                     | A_32_P40288  | 1.0 | 3.6E-04 |
| DPYSL3       | dihydropyrimidinase-like 3                                                                     | A_23_P7528   | 1.0 | 1.3E-04 |
| CDKN1A       | cyclin-dependent kinase inhibitor 1A (p21, Cip1)                                               | A_24_P89457  | 1.0 | 5.3E-04 |
| BOC          | Boc homolog (mouse)                                                                            | A_23_P257763 | 1.0 | 1.1E-04 |
| PDGFR1       | platelet-derived growth factor receptor-like                                                   | A_23_P60146  | 1.0 | 3.4E-03 |
| TMEM176B     | transmembrane protein 176B                                                                     | A_23_P157007 | 1.0 | 9.0E-05 |
| EGFLAM       | EGF-like, fibronectin type III and laminin G domains                                           | A_23_P144911 | 1.0 | 2.5E-05 |
| SAMD4A       | sterile alpha motif domain containing 4A                                                       | A_24_P383523 | 1.0 | 6.8E-04 |
| LINGO1       | leucine rich repeat and Ig domain containing 1                                                 | A_24_P112941 | 1.0 | 3.2E-02 |
| SNHG8        | small nucleolar RNA host gene 8 (non-protein coding)                                           | A_24_P498767 | 1.0 | 1.4E-04 |
| VCAN         | versican                                                                                       | A_23_P144959 | 1.0 | 3.4E-04 |
| PDK1         | pyruvate dehydrogenase kinase, isozyme 1                                                       | A_23_P10614  | 1.0 | 6.6E-03 |
| CLECL1       | C-type lectin-like 1                                                                           | A_23_P321984 | 1.0 | 3.6E-02 |
| SLC38A4      | solute carrier family 38, member 4                                                             | A_24_P321581 | 1.0 | 9.1E-03 |
| CD83         | CD83 molecule                                                                                  | A_23_P70670  | 1.0 | 2.2E-03 |
| CARD11       | caspase recruitment domain family, member 11                                                   | A_24_P945262 | 1.0 | 2.9E-03 |
| SPSB1        | splA/ryanodine receptor domain and SOCS box containing 1                                       | A_23_P200096 | 1.0 | 2.0E-03 |
| COL7A1       | collagen, type VII, alpha 1                                                                    | A_23_P144071 | 1.0 | 6.7E-04 |
| SPAG4        | sperm associated antigen 4                                                                     | A_23_P132027 | 1.0 | 6.3E-03 |
| GALNT6       | UDP-N-acetyl-alpha-D-galactosamine:polypeptide N-acetylgalactosaminyltransferase 6 (GalNAc-T6) | A_23_P204133 | 1.0 | 3.6E-04 |
| NLGN4Y       | neuroligin 4, Y-linked                                                                         | A_23_P121441 | 1.0 | 1.3E-03 |
| FAM83A       | family with sequence similarity 83, member A                                                   | A_23_P216052 | 1.0 | 1.1E-02 |
| MYBPC2       | myosin binding protein C, fast type                                                            | A_23_P16262  | 1.0 | 4.0E-03 |
| NEFL         | neurofilament, light polypeptide                                                               | A_24_P18137  | 1.0 | 1.2E-02 |
| HSH2D        | hematopoietic SH2 domain containing                                                            | A_23_P153372 | 1.0 | 4.9E-04 |
| IGFBP7       | insulin-like growth factor binding protein 7                                                   | A_23_P353035 | 1.0 | 3.7E-05 |
| PODNL1       | podocan-like 1                                                                                 | A_23_P433798 | 1.0 | 1.1E-03 |
| SACS         | spastic ataxia of Charlevoix-Saguenay (sacsin)                                                 | A_23_P308073 | 1.0 | 4.5E-05 |
| GNB5         | guanine nucleotide binding protein (G protein), beta 5                                         | A_24_P911571 | 1.0 | 3.6E-03 |
| COL18A1      | collagen, type XVIII, alpha 1                                                                  | A_23_P211212 | 1.0 | 9.7E-05 |
| GJB3         | gap junction protein, beta 3, 31kDa                                                            | A_24_P379233 | 1.0 | 8.9E-03 |
| LOC100129973 | hypothetical LOC100129973                                                                      | A_24_P497318 | 1.0 | 8.8E-03 |
| DRD5         | dopamine receptor D5                                                                           | A_32_P54274  | 1.0 | 5.8E-03 |
| STEAP3       | STEAP family member 3                                                                          | A_23_P90601  | 1.0 | 1.5E-04 |

|           |                                                                 |              |     |         |
|-----------|-----------------------------------------------------------------|--------------|-----|---------|
| DPEP1     | dipeptidase 1 (renal)                                           | A_23_P152262 | 1.0 | 9.4E-03 |
| EPHB2     | EPH receptor B2                                                 | A_23_P200067 | 1.0 | 1.7E-05 |
| PGLYRP4   | peptidoglycan recognition protein 4                             | A_24_P231302 | 1.0 | 2.0E-03 |
| NBPF1     | neuroblastoma breakpoint family, member 1                       | A_24_P566932 | 1.0 | 1.3E-02 |
| CYTL1     | cytokine-like 1                                                 | A_23_P10647  | 1.0 | 2.2E-02 |
| KGFLP1    | keratinocyte growth factor-like protein 1                       | A_32_P11372  | 1.0 | 9.5E-04 |
| MX2       | myxovirus (influenza virus) resistance 2 (mouse)                | A_23_P6263   | 1.0 | 4.7E-05 |
| XKR4      | XK, Kell blood group complex subunit-related family, member 4   | A_32_P134007 | 1.0 | 1.1E-02 |
| SP140     | SP140 nuclear body protein                                      | A_24_P328504 | 1.0 | 5.8E-03 |
| IL7       | interleukin 7                                                   | A_23_P8961   | 1.0 | 4.9E-04 |
| RGS20     | regulator of G-protein signaling 20                             | A_23_P73097  | 1.0 | 1.9E-03 |
| AARSD1    | alanyl-tRNA synthetase domain containing 1                      | A_23_P207414 | 1.0 | 1.4E-02 |
| TRO       | trophinin                                                       | A_23_P217228 | 1.0 | 1.0E-04 |
| LSP1      | lymphocyte-specific protein 1                                   | A_23_P13382  | 1.0 | 3.0E-04 |
| PACSIN1   | protein kinase C and casein kinase substrate in neurons 1       | A_23_P258088 | 1.0 | 6.5E-04 |
| ALDH1B1   | aldehyde dehydrogenase 1 family, member B1                      | A_23_P135294 | 1.0 | 2.2E-05 |
| C8orf75   | chromosome 8 open reading frame 75                              | A_24_P333532 | 1.0 | 2.9E-02 |
| HMGB3P24  | high-mobility group box 3 pseudogene 24                         | A_24_P49747  | 1.0 | 3.1E-02 |
| COL12A1   | collagen, type XII, alpha 1                                     | A_24_P291814 | 1.0 | 3.5E-03 |
| KBTBD8    | kelch repeat and BTB (POZ) domain containing 8                  | A_23_P431252 | 1.0 | 1.9E-02 |
| P2RY8     | purinergic receptor P2Y, G-protein coupled, 8                   | A_24_P340128 | 1.0 | 4.7E-03 |
| S100B     | S100 calcium binding protein B                                  | A_23_P143526 | 1.0 | 9.3E-03 |
| FAM83F    | family with sequence similarity 83, member F                    | A_23_P343963 | 1.0 | 1.4E-02 |
| PMEPA1    | prostate transmembrane protein, androgen induced 1              | A_24_P413126 | 1.0 | 2.8E-05 |
| C1QTNF3   | C1q and tumor necrosis factor related protein 3                 | A_23_P122067 | 1.0 | 8.6E-03 |
| HTR1F     | 5-hydroxytryptamine (serotonin) receptor 1F                     | A_23_P166674 | 1.0 | 1.7E-02 |
| MARCH4    | membrane-associated ring finger (C3HC4) 4                       | A_23_P333228 | 1.0 | 1.7E-02 |
| LOC730101 | hypothetical LOC730101                                          | A_24_P500422 | 1.0 | 1.4E-03 |
| ADC       | arginine decarboxylase                                          | A_24_P11462  | 1.0 | 4.8E-09 |
| CR2       | complement component (3d/Epstein Barr virus) receptor 2         | A_23_P124542 | 1.0 | 3.3E-02 |
| MYO3B     | myosin IIIB                                                     | A_23_P417853 | 1.0 | 2.3E-03 |
| GNG2      | guanine nucleotide binding protein (G protein), gamma 2         | A_32_P208403 | 1.0 | 8.3E-05 |
| CARD14    | caspase recruitment domain family, member 14                    | A_23_P320070 | 1.0 | 1.8E-02 |
| TFF3      | trefoil factor 3 (intestinal)                                   | A_23_P393099 | 1.0 | 3.8E-02 |
| C16orf74  | chromosome 16 open reading frame 74                             | A_24_P289178 | 1.0 | 3.5E-04 |
| TSLP      | thymic stromal lymphopoietin                                    | A_23_P121987 | 1.0 | 9.2E-03 |
| PODXL2    | podocalyxin-like 2                                              | A_23_P121037 | 1.0 | 2.6E-03 |
| ITPRIPL1  | inositol 1,4,5-triphosphate receptor interacting protein-like 1 | A_32_P525524 | 1.0 | 1.9E-06 |
| CNIH3     | cornichon homolog 3 (Drosophila)                                | A_23_P384044 | 1.0 | 4.4E-03 |

|          |                                                                                                        |              |     |         |
|----------|--------------------------------------------------------------------------------------------------------|--------------|-----|---------|
| CLGN     | calmegin                                                                                               | A_23_P18684  | 1.0 | 2.7E-02 |
| TRAF1    | TNF receptor-associated factor 1                                                                       | A_24_P89891  | 1.0 | 2.1E-04 |
| RPRML    | reprimo-like                                                                                           | A_32_P3476   | 1.0 | 3.7E-02 |
| UHRF1    | ubiquitin-like with PHD and ring finger domains 1                                                      | A_23_P208880 | 1.0 | 1.3E-02 |
| CNTNAP2  | contactin associated protein-like 2                                                                    | A_23_P84399  | 1.0 | 8.8E-03 |
| PPM1E    | protein phosphatase, Mg2+/Mn2+ dependent, 1E                                                           | A_32_P73796  | 1.0 | 3.1E-02 |
| SCARA3   | scavenger receptor class A, member 3                                                                   | A_23_P215900 | 1.0 | 1.1E-04 |
| ZNF436   | zinc finger protein 436                                                                                | A_23_P51202  | 1.0 | 8.6E-05 |
| E2F7     | E2F transcription factor 7                                                                             | A_32_P210202 | 1.0 | 3.5E-02 |
| OAF      | OAF homolog (Drosophila)                                                                               | A_23_P310590 | 1.0 | 3.0E-04 |
| CLSTN3   | calsyntenin 3                                                                                          | A_23_P53724  | 1.0 | 1.1E-06 |
| SPACA3   | sperm acrosome associated 3                                                                            | A_23_P317244 | 1.0 | 9.8E-05 |
| SPDEF    | SAM pointed domain containing ets transcription factor                                                 | A_23_P111194 | 1.0 | 9.0E-04 |
| MYC      | v-myc myelocytomatosis viral oncogene homolog (avian)                                                  | A_23_P215956 | 1.0 | 1.4E-02 |
| ANTXR1   | anthrax toxin receptor 1                                                                               | A_24_P131522 | 0.9 | 2.1E-04 |
| SIDT1    | SID1 transmembrane family, member 1                                                                    | A_23_P132515 | 0.9 | 1.9E-06 |
| CD209    | CD209 molecule                                                                                         | A_24_P305345 | 0.9 | 9.3E-04 |
| SERPINF1 | serpin peptidase inhibitor, clade F (alpha-2 antiplasmin, pigment epithelium derived factor), member 1 | A_23_P100660 | 0.9 | 1.1E-04 |
| DCLK1    | doublecortin-like kinase 1                                                                             | A_24_P928627 | 0.9 | 3.1E-02 |
| SERPINI1 | serpin peptidase inhibitor, clade I (neuroserpin), member 1                                            | A_23_P166929 | 0.9 | 3.4E-03 |
| C14orf37 | chromosome 14 open reading frame 37                                                                    | A_24_P181295 | 0.9 | 2.6E-03 |
| SLC4A7   | solute carrier family 4, sodium bicarbonate cotransporter, member 7                                    | A_24_P362931 | 0.9 | 6.3E-05 |
| ANK2     | ankyrin 2, neuronal                                                                                    | A_23_P133068 | 0.9 | 4.1E-04 |
| PLAUR    | plasminogen activator, urokinase receptor                                                              | A_23_P16469  | 0.9 | 7.7E-03 |
| NRAP     | nebulin-related anchoring protein                                                                      | A_23_P402765 | 0.9 | 7.5E-03 |
| FLJ36031 | hypothetical protein FLJ36031                                                                          | A_23_P406616 | 0.9 | 1.6E-02 |
| GPX8     | glutathione peroxidase 8 (putative)                                                                    | A_23_P404259 | 0.9 | 9.0E-03 |
| STAG3    | stromal antigen 3                                                                                      | A_23_P145657 | 0.9 | 4.1E-03 |
| COL5A1   | collagen, type V, alpha 1                                                                              | A_32_P95034  | 0.9 | 1.4E-02 |
| FBXO16   | F-box protein 16                                                                                       | A_23_P168847 | 0.9 | 5.7E-03 |
| ENTPD7   | ectonucleoside triphosphate diphosphohydrolase 7                                                       | A_24_P112447 | 0.9 | 1.6E-04 |
| DOK5     | docking protein 5                                                                                      | A_23_P40217  | 0.9 | 4.9E-06 |
| PIM1     | pim-1 oncogene                                                                                         | A_23_P345118 | 0.9 | 1.4E-03 |
| SYT6     | synaptotagmin VI                                                                                       | A_23_P398947 | 0.9 | 4.0E-03 |
| RUNX3    | runt-related transcription factor 3                                                                    | A_23_P51231  | 0.9 | 1.8E-03 |
| CADPS    | Ca++-dependent secretion activator                                                                     | A_23_P69326  | 0.9 | 3.6E-06 |
| AGR3     | anterior gradient homolog 3 (Xenopus laevis)                                                           | A_23_P42811  | 0.9 | 6.1E-03 |
| TIMP1    | TIMP metalloproteinase inhibitor 1                                                                     | A_23_P62115  | 0.9 | 7.6E-03 |

|              |                                                                                                  |              |     |         |
|--------------|--------------------------------------------------------------------------------------------------|--------------|-----|---------|
| LOXL4        | lysyl oxidase-like 4                                                                             | A_24_P406754 | 0.9 | 3.6E-03 |
| ST8SIA1      | ST8 alpha-N-acetyl-neuraminide alpha-2,8-sialyltransferase 1                                     | A_23_P354705 | 0.9 | 2.5E-04 |
| LOC100506779 | hypothetical LOC100506779                                                                        | A_24_P829107 | 0.9 | 1.1E-04 |
| CCL21        | chemokine (C-C motif) ligand 21                                                                  | A_23_P112470 | 0.9 | 2.7E-03 |
| ZFP36        | zinc finger protein 36, C3H type, homolog (mouse)                                                | A_23_P39237  | 0.9 | 2.5E-02 |
| TPPP3        | tubulin polymerization-promoting protein family member 3                                         | A_23_P26386  | 0.9 | 1.1E-03 |
| VSTM2L       | V-set and transmembrane domain containing 2 like                                                 | A_23_P79803  | 0.9 | 3.5E-03 |
| E2F8         | E2F transcription factor 8                                                                       | A_23_P35871  | 0.9 | 4.8E-02 |
| ITGB1BP2     | integrin beta 1 binding protein (melusin) 2                                                      | A_23_P45424  | 0.9 | 1.6E-03 |
| DACT3        | dapper, antagonist of beta-catenin, homolog 3 (Xenopus laevis)                                   | A_23_P360964 | 0.9 | 6.8E-05 |
| ACTN1        | actinin, alpha 1                                                                                 | A_32_P115162 | 0.9 | 4.6E-05 |
| RAB3B        | RAB3B, member RAS oncogene family                                                                | A_23_P388168 | 0.9 | 4.1E-02 |
| GALNT14      | UDP-N-acetyl-alpha-D-galactosamine:polypeptide N-acetylgalactosaminyltransferase 14 (GalNAc-T14) | A_23_P67847  | 0.9 | 4.6E-02 |
| KREMEN2      | kringle containing transmembrane protein 2                                                       | A_23_P77612  | 0.9 | 5.5E-03 |
| ARHGAP22     | Rho GTPase activating protein 22                                                                 | A_23_P75310  | 0.9 | 5.7E-05 |
| LIPC         | lipase, hepatic                                                                                  | A_23_P88559  | 0.9 | 1.0E-02 |
| HELB         | helicase (DNA) B                                                                                 | A_23_P2294   | 0.9 | 1.4E-02 |
| TRIM47       | tripartite motif containing 47                                                                   | A_23_P26697  | 0.9 | 2.3E-07 |
| OSM          | oncostatin M                                                                                     | A_23_P166408 | 0.9 | 1.1E-02 |
| TEX11        | testis expressed 11                                                                              | A_23_P96501  | 0.9 | 7.4E-03 |
| EMB          | embigin                                                                                          | A_24_P684186 | 0.9 | 9.0E-06 |
| ELF3         | E74-like factor 3 (ets domain transcription factor, epithelial-specific)                         | A_23_P104188 | 0.9 | 1.3E-02 |
| SEMA7A       | semaphorin 7A, GPI membrane anchor (John Milton Hagen blood group)                               | A_23_P106389 | 0.9 | 4.8E-02 |
| CACNA1G      | calcium channel, voltage-dependent, T type, alpha 1G subunit                                     | A_23_P107247 | 0.9 | 1.3E-04 |
| PRSS22       | protease, serine, 22                                                                             | A_23_P400298 | 0.9 | 3.3E-04 |
| RGPD2        | RANBP2-like and GRIP domain containing 2                                                         | A_32_P108544 | 0.9 | 4.4E-02 |
| HHAT         | hedgehog acyltransferase                                                                         | A_23_P136355 | 0.9 | 4.0E-07 |
| SLC7A5       | solute carrier family 7 (cationic amino acid transporter, y+ system), member 5                   | A_24_P335620 | 0.9 | 2.8E-03 |
| GPR115       | G protein-coupled receptor 115                                                                   | A_24_P337671 | 0.9 | 1.5E-02 |
| BLNK         | B-cell linker                                                                                    | A_24_P64344  | 0.9 | 1.8E-03 |
| MADCAM1      | mucosal vascular addressin cell adhesion molecule 1                                              | A_23_P153616 | 0.9 | 1.5E-02 |
| TRAF5        | TNF receptor-associated factor 5                                                                 | A_23_P201731 | 0.9 | 4.9E-07 |
| GABPB1       | GA binding protein transcription factor, beta subunit 1                                          | A_23_P205789 | 0.9 | 2.8E-04 |
| KYNU         | kynureninase                                                                                     | A_23_P56898  | 0.9 | 3.9E-03 |
| SDSL         | serine dehydratase-like                                                                          | A_23_P53439  | 0.9 | 4.4E-05 |
| NAP1L3       | nucleosome assembly protein 1-like 3                                                             | A_23_P125717 | 0.9 | 7.4E-04 |
| NEK6         | NIMA (never in mitosis gene a)-related kinase 6                                                  | A_23_P216920 | 0.9 | 1.1E-05 |

|           |                                                                                                                   |              |     |         |
|-----------|-------------------------------------------------------------------------------------------------------------------|--------------|-----|---------|
| TTC39C    | tetratricopeptide repeat domain 39C                                                                               | A_32_P168756 | 0.9 | 4.2E-08 |
| HDAC9     | histone deacetylase 9                                                                                             | A_23_P404162 | 0.9 | 6.5E-03 |
| STK38L    | serine/threonine kinase 38 like                                                                                   | A_23_P64743  | 0.9 | 5.8E-05 |
| CLIP3     | CAP-GLY domain containing linker protein 3                                                                        | A_24_P279718 | 0.9 | 2.3E-03 |
| UAP1      | UDP-N-acetylglucosamine pyrophosphorylase 1                                                                       | A_23_P160460 | 0.9 | 6.4E-04 |
| EMBP1     | embigin pseudogene 1                                                                                              | A_32_P206541 | 0.9 | 1.8E-05 |
| ADAM8     | ADAM metalloproteinase domain 8                                                                                   | A_24_P300777 | 0.9 | 7.8E-04 |
| NAMPT     | nicotinamide phosphoribosyltransferase                                                                            | A_23_P305060 | 0.9 | 3.6E-02 |
| RSPH9     | radial spoke head 9 homolog (Chlamydomonas)                                                                       | A_24_P55225  | 0.9 | 3.8E-02 |
| BHLHE40   | basic helix-loop-helix family, member e40                                                                         | A_24_P268676 | 0.9 | 3.1E-04 |
| SCN3A     | sodium channel, voltage-gated, type III, alpha subunit                                                            | A_24_P85888  | 0.9 | 3.3E-02 |
| LOC339894 | hypothetical LOC339894                                                                                            | A_24_P854556 | 0.9 | 3.6E-03 |
| THBS1     | thrombospondin 1                                                                                                  | A_23_P206212 | 0.9 | 4.0E-02 |
| SERTAD4   | SERTA domain containing 4                                                                                         | A_23_P318904 | 0.9 | 1.1E-02 |
| C8orf45   | chromosome 8 open reading frame 45                                                                                | A_23_P390755 | 0.9 | 6.0E-03 |
| LITAF     | lipopolysaccharide-induced TNF factor                                                                             | A_23_P3532   | 0.9 | 3.8E-05 |
| HIST1H4J  | histone cluster 1, H4j                                                                                            | A_23_P30805  | 0.9 | 3.4E-05 |
| GPR174    | G protein-coupled receptor 174                                                                                    | A_23_P11070  | 0.9 | 9.7E-03 |
| MIR17HG   | miR-17-92 cluster host gene (non-protein coding)                                                                  | A_24_P529168 | 0.9 | 4.3E-03 |
| STAB2     | stabilin 2                                                                                                        | A_23_P162607 | 0.9 | 8.4E-04 |
| PDGFD     | platelet derived growth factor D                                                                                  | A_24_P124349 | 0.9 | 2.5E-02 |
| HMGB3     | high-mobility group box 3                                                                                         | A_23_P217236 | 0.9 | 4.3E-03 |
| PPP2R2C   | protein phosphatase 2, regulatory subunit B, gamma                                                                | A_24_P3415   | 0.9 | 2.5E-02 |
| C1orf106  | chromosome 1 open reading frame 106                                                                               | A_23_P1043   | 0.9 | 1.1E-04 |
| MND1      | meiotic nuclear divisions 1 homolog (S. cerevisiae)                                                               | A_23_P133123 | 0.9 | 5.5E-03 |
| ANKRD36B  | ankyrin repeat domain 36B                                                                                         | A_24_P324749 | 0.9 | 2.2E-02 |
| LOC729683 | hypothetical protein LOC729683                                                                                    | A_32_P145010 | 0.9 | 8.6E-05 |
| SPHK1     | sphingosine kinase 1                                                                                              | A_23_P38106  | 0.9 | 4.0E-03 |
| SEL1L3    | sel-1 suppressor of lin-12-like 3 (C. elegans)                                                                    | A_23_P426021 | 0.9 | 1.3E-05 |
| RCAN1     | regulator of calcineurin 1                                                                                        | A_23_P166248 | 0.9 | 1.3E-03 |
| AQP3      | aquaporin 3 (Gill blood group)                                                                                    | A_23_P112482 | 0.9 | 5.4E-03 |
| CMAH      | cytidine monophosphate-N-acetylneuraminic acid hydroxylase (CMP-N-acetylneuraminic acid monooxygenase) pseudogene | A_23_P351467 | 0.9 | 9.1E-03 |
| STRC      | stereocilin                                                                                                       | A_23_P163238 | 0.9 | 4.4E-02 |
| TRAF3     | TNF receptor-associated factor 3                                                                                  | A_23_P37068  | 0.9 | 1.7E-06 |
| PCSK1N    | proprotein convertase subtilisin/kexin type 1 inhibitor                                                           | A_23_P22487  | 0.9 | 2.0E-06 |
| ARID5B    | AT rich interactive domain 5B (MRF1-like)                                                                         | A_23_P97871  | 0.9 | 9.1E-03 |
| RAB30     | RAB30, member RAS oncogene family                                                                                 | A_24_P167338 | 0.9 | 3.0E-02 |
| SLC16A7   | solute carrier family 16, member 7 (monocarboxylic acid transporter 2)                                            | A_23_P117059 | 0.9 | 2.5E-04 |

|          |                                                                       |              |     |         |
|----------|-----------------------------------------------------------------------|--------------|-----|---------|
| PPM1J    | protein phosphatase, Mg <sup>2+</sup> /Mn <sup>2+</sup> dependent, 1J | A_23_P201939 | 0.9 | 2.2E-09 |
| LZTS1    | leucine zipper, putative tumor suppressor 1                           | A_23_P20443  | 0.9 | 8.9E-03 |
| LY96     | lymphocyte antigen 96                                                 | A_23_P94230  | 0.9 | 1.1E-04 |
| FOSL2    | FOS-like antigen 2                                                    | A_23_P348121 | 0.9 | 1.3E-02 |
| HGF      | hepatocyte growth factor (hepapoietin A; scatter factor)              | A_23_P93787  | 0.9 | 3.5E-04 |
| RAB6B    | RAB6B, member RAS oncogene family                                     | A_24_P475349 | 0.9 | 6.0E-03 |
| CCRN4L   | CCR4 carbon catabolite repression 4-like (S. cerevisiae)              | A_24_P213794 | 0.9 | 1.4E-02 |
| SCARNA17 | small Cajal body-specific RNA 17                                      | A_32_P37592  | 0.9 | 5.1E-04 |
| F12      | coagulation factor XII (Hageman factor)                               | A_23_P167674 | 0.9 | 3.8E-06 |
| DYRK3    | dual-specificity tyrosine-(Y)-phosphorylation regulated kinase 3      | A_24_P345209 | 0.9 | 7.4E-03 |
| ZAP70    | zeta-chain (TCR) associated protein kinase 70kDa                      | A_23_P39682  | 0.9 | 6.2E-03 |
| HAPLN3   | hyaluronan and proteoglycan link protein 3                            | A_23_P14754  | 0.9 | 5.1E-04 |
| ADAD1    | adenosine deaminase domain containing 1 (testis-specific)             | A_23_P41514  | 0.9 | 1.6E-02 |
| LRRTM3   | leucine rich repeat transmembrane neuronal 3                          | A_24_P295465 | 0.9 | 5.1E-03 |
| RAB33A   | RAB33A, member RAS oncogene family                                    | A_23_P147025 | 0.9 | 5.3E-05 |
| SLC35F3  | solute carrier family 35, member F3                                   | A_23_P422212 | 0.9 | 4.2E-03 |
| BCL2A1   | BCL2-related protein A1                                               | A_23_P152002 | 0.9 | 4.7E-02 |
| MYOM1    | myomesin 1, 185kDa                                                    | A_23_P96271  | 0.9 | 9.9E-04 |
| GPAM     | glycerol-3-phosphate acyltransferase, mitochondrial                   | A_23_P104237 | 0.9 | 3.2E-02 |
| CCL1     | chemokine (C-C motif) ligand 1                                        | A_23_P49759  | 0.9 | 2.5E-03 |
| SIGLEC15 | sialic acid binding Ig-like lectin 15                                 | A_23_P50146  | 0.9 | 2.7E-02 |
| PDE11A   | phosphodiesterase 11A                                                 | A_32_P228037 | 0.9 | 9.3E-03 |
| ARHGEF25 | Rho guanine nucleotide exchange factor (GEF) 25                       | A_23_P98844  | 0.9 | 4.1E-03 |
| TBX1     | T-box 1                                                               | A_23_P40527  | 0.9 | 1.1E-02 |
| GRAP2    | GRB2-related adaptor protein 2                                        | A_24_P10884  | 0.9 | 1.5E-02 |
| ANKS4B   | ankyrin repeat and sterile alpha motif domain containing 4B           | A_23_P385766 | 0.9 | 9.1E-03 |
| CLCF1    | cardiotrophin-like cytokine factor 1                                  | A_23_P138760 | 0.9 | 1.3E-02 |
| TRPS1    | trichorhinophalangeal syndrome I                                      | A_32_P106980 | 0.9 | 1.2E-04 |
| C8orf34  | chromosome 8 open reading frame 34                                    | A_23_P73311  | 0.9 | 1.9E-02 |
| ENC1     | ectodermal-neural cortex 1 (with BTB-like domain)                     | A_24_P69095  | 0.9 | 4.8E-03 |
| SMR3A    | submaxillary gland androgen regulated protein 3A                      | A_23_P41365  | 0.9 | 4.4E-02 |
| KIT      | v-kit Hardy-Zuckerman 4 feline sarcoma viral oncogene homolog         | A_23_P110253 | 0.9 | 2.1E-02 |
| DGKI     | diacylglycerol kinase, iota                                           | A_23_P169909 | 0.9 | 5.9E-03 |
| ZNF676   | zinc finger protein 676                                               | A_24_P205036 | 0.9 | 8.2E-03 |
| SEZ6L    | seizure related 6 homolog (mouse)-like                                | A_32_P124819 | 0.9 | 1.8E-02 |
| ZNF643   | zinc finger protein 643                                               | A_23_P160200 | 0.9 | 9.2E-05 |
| PHTF2    | putative homeodomain transcription factor 2                           | A_24_P323944 | 0.9 | 1.5E-04 |
| CEP152   | centrosomal protein 152kDa                                            | A_24_P805626 | 0.9 | 6.4E-03 |
| CLU      | clusterin                                                             | A_23_P215913 | 0.8 | 1.1E-02 |

|          |                                                              |              |     |         |
|----------|--------------------------------------------------------------|--------------|-----|---------|
| CNKSR3   | CNKSR family member 3                                        | A_23_P134085 | 0.8 | 1.2E-04 |
| JAK3     | Janus kinase 3                                               | A_24_P59667  | 0.8 | 3.8E-03 |
| ODF3B    | outer dense fiber of sperm tails 3B                          | A_24_P402261 | 0.8 | 2.0E-02 |
| NBEA     | neurobeachin                                                 | A_23_P65278  | 0.8 | 1.0E-02 |
| EGFL6    | EGF-like-domain, multiple 6                                  | A_23_P22596  | 0.8 | 1.0E-02 |
| SH3BGR   | SH3 domain binding glutamic acid-rich protein                | A_23_P91520  | 0.8 | 2.9E-03 |
| C7orf68  | chromosome 7 open reading frame 68                           | A_23_P20022  | 0.8 | 3.3E-03 |
| SCUBE2   | signal peptide, CUB domain, EGF-like 2                       | A_23_P105144 | 0.8 | 5.3E-03 |
| NTF3     | neurotrophin 3                                               | A_23_P360797 | 0.8 | 2.7E-02 |
| SEPT6    | septin 6                                                     | A_23_P22614  | 0.8 | 6.2E-04 |
| FAM131B  | family with sequence similarity 131, member B                | A_24_P252310 | 0.8 | 1.7E-03 |
| TIFA     | TRAF-interacting protein with forkhead-associated domain     | A_23_P352619 | 0.8 | 1.5E-02 |
| FRK      | fyn-related kinase                                           | A_23_P133665 | 0.8 | 3.5E-04 |
| ABCC3    | ATP-binding cassette, sub-family C (CFTR/MRP), member 3      | A_23_P207507 | 0.8 | 1.4E-02 |
| PVRIG    | poliovirus receptor related immunoglobulin domain containing | A_23_P8424   | 0.8 | 5.4E-04 |
| TSPEAR   | thrombospondin-type laminin G domain and EAR repeats         | A_23_P394972 | 0.8 | 4.3E-03 |
| SBNO2    | strawberry notch homolog 2 (Drosophila)                      | A_23_P5273   | 0.8 | 4.0E-04 |
| MRGPRF   | MAS-related GPR, member F                                    | A_23_P432573 | 0.8 | 1.6E-03 |
| IKZF2    | IKAROS family zinc finger 2 (Helios)                         | A_23_P323872 | 0.8 | 1.8E-02 |
| GABRA2   | gamma-aminobutyric acid (GABA) A receptor, alpha 2           | A_23_P167121 | 0.8 | 7.7E-03 |
| STAR     | steroidogenic acute regulatory protein                       | A_23_P8981   | 0.8 | 1.4E-02 |
| IL20RB   | interleukin 20 receptor beta                                 | A_23_P91850  | 0.8 | 4.2E-03 |
| SDC1     | syndecan 1                                                   | A_23_P16944  | 0.8 | 1.0E-04 |
| ZNF174   | zinc finger protein 174                                      | A_24_P418878 | 0.8 | 1.2E-02 |
| SOCS1    | suppressor of cytokine signaling 1                           | A_23_P420196 | 0.8 | 7.9E-04 |
| EPST1    | epithelial stromal interaction 1 (breast)                    | A_23_P105794 | 0.8 | 2.6E-02 |
| FAM110C  | family with sequence similarity 110, member C                | A_32_P47643  | 0.8 | 1.5E-04 |
| SAMSN1   | SAM domain, SH3 domain and nuclear localization signals 1    | A_23_P29005  | 0.8 | 2.3E-02 |
| HOXD8    | homeobox D8                                                  | A_23_P210164 | 0.8 | 2.1E-03 |
| PROX1    | prospero homeobox 1                                          | A_23_P137634 | 0.8 | 4.5E-02 |
| RGS2     | regulator of G-protein signaling 2, 24kDa                    | A_23_P114947 | 0.8 | 4.3E-02 |
| BMP4     | bone morphogenetic protein 4                                 | A_23_P54144  | 0.8 | 1.1E-02 |
| HIST1H4K | histone cluster 1, H4k                                       | A_23_P30813  | 0.8 | 4.4E-05 |
| KCNF1    | potassium voltage-gated channel, subfamily F, member 1       | A_23_P142765 | 0.8 | 1.5E-02 |
| HAMP     | hepcidin antimicrobial peptide                               | A_23_P165162 | 0.8 | 1.6E-02 |
| PFKP     | phosphofructokinase, platelet                                | A_23_P46928  | 0.8 | 9.3E-05 |
| LRRN2    | leucine rich repeat neuronal 2                               | A_23_P11843  | 0.8 | 9.6E-04 |
| HERC4    | hect domain and RLD 4                                        | A_24_P936041 | 0.8 | 4.2E-02 |



|           |                                                                           |              |     |         |
|-----------|---------------------------------------------------------------------------|--------------|-----|---------|
| SMAD3     | SMAD family member 3                                                      | A_23_P359091 | 0.8 | 2.3E-05 |
| KLHL4     | kelch-like 4 (Drosophila)                                                 | A_23_P171150 | 0.8 | 2.8E-02 |
| LOC401021 | hypothetical LOC401021                                                    | A_32_P211117 | 0.8 | 2.3E-02 |
| CCDC136   | coiled-coil domain containing 136                                         | A_23_P416178 | 0.8 | 1.9E-04 |
| PLOD2     | procollagen-lysine, 2-oxoglutarate 5-dioxygenase 2                        | A_23_P211910 | 0.8 | 2.3E-03 |
| CXXC5     | CXXC finger protein 5                                                     | A_23_P399001 | 0.8 | 3.1E-06 |
| EFCAB11   | EF-hand calcium binding domain 11                                         | A_23_P129014 | 0.8 | 1.8E-04 |
| TNFRSF25  | tumor necrosis factor receptor superfamily, member 25                     | A_23_P126844 | 0.8 | 1.2E-03 |
| DNAJB5    | DnaJ (Hsp40) homolog, subfamily B, member 5                               | A_23_P112241 | 0.8 | 4.2E-04 |
| RAB37     | RAB37, member RAS oncogene family                                         | A_23_P414654 | 0.8 | 3.2E-04 |
| ZFHX2     | zinc finger homeobox 2                                                    | A_32_P226205 | 0.8 | 3.4E-02 |
| CIB2      | calcium and integrin binding family member 2                              | A_23_P65890  | 0.8 | 2.0E-07 |
| ZNF80     | zinc finger protein 80                                                    | A_23_P256526 | 0.8 | 2.0E-03 |
| ZP3       | zona pellucida glycoprotein 3 (sperm receptor)                            | A_24_P95059  | 0.8 | 1.1E-02 |
| TXLNB     | taxilin beta                                                              | A_23_P434398 | 0.8 | 3.1E-02 |
| CHEK2     | CHK2 checkpoint homolog (S. pombe)                                        | A_23_P109452 | 0.8 | 3.1E-07 |
| NFATC1    | nuclear factor of activated T-cells, cytoplasmic, calcineurin-dependent 1 | A_24_P258846 | 0.8 | 1.0E-02 |
| KBTBD10   | kelch repeat and BTB (POZ) domain containing 10                           | A_23_P17190  | 0.8 | 4.9E-03 |
| PLEK      | pleckstrin                                                                | A_23_P209678 | 0.8 | 3.4E-02 |
| HOMER3    | homer homolog 3 (Drosophila)                                              | A_23_P39364  | 0.8 | 4.2E-06 |
| CTSL1     | cathepsin L1                                                              | A_23_P94533  | 0.8 | 1.3E-02 |
| PRKACB    | protein kinase, cAMP-dependent, catalytic, beta                           | A_23_P371410 | 0.8 | 2.8E-03 |
| PAK3      | p21 protein (Cdc42/Rac)-activated kinase 3                                | A_23_P346813 | 0.8 | 1.5E-02 |
| C12orf42  | chromosome 12 open reading frame 42                                       | A_32_P133767 | 0.8 | 4.7E-03 |
| FAM129C   | family with sequence similarity 129, member C                             | A_24_P940348 | 0.8 | 2.6E-02 |
| DZIP3     | DAZ interacting protein 3, zinc finger                                    | A_24_P102504 | 0.8 | 4.2E-02 |
| PHKG1     | phosphorylase kinase, gamma 1 (muscle)                                    | A_32_P193166 | 0.8 | 1.9E-05 |
| NEK11     | NIMA (never in mitosis gene a)- related kinase 11                         | A_23_P211973 | 0.8 | 3.3E-02 |
| PLD4      | phospholipase D family, member 4                                          | A_23_P88222  | 0.8 | 3.5E-05 |
| DUSP14    | dual specificity phosphatase 14                                           | A_23_P207537 | 0.8 | 6.2E-04 |
| ATP1B2    | ATPase, Na <sup>+</sup> /K <sup>+</sup> transporting, beta 2 polypeptide  | A_24_P31275  | 0.8 | 6.3E-05 |
| RAB3IL1   | RAB3A interacting protein (rabin3)-like 1                                 | A_23_P75800  | 0.8 | 3.5E-04 |
| WEE1      | WEE1 homolog (S. pombe)                                                   | A_23_P127926 | 0.8 | 7.7E-03 |
| SORCS2    | sortilin-related VPS10 domain containing receptor 2                       | A_23_P121665 | 0.8 | 1.9E-03 |
| ATRNL1    | attractin-like 1                                                          | A_24_P100627 | 0.8 | 4.7E-02 |
| VLDLR     | very low density lipoprotein receptor                                     | A_23_P43476  | 0.8 | 1.9E-04 |
| CRABP2    | cellular retinoic acid binding protein 2                                  | A_23_P115064 | 0.8 | 2.5E-05 |
| TMEM117   | transmembrane protein 117                                                 | A_23_P2573   | 0.8 | 6.0E-06 |
| PARD6G    | par-6 partitioning defective 6 homolog gamma (C. elegans)                 | A_24_P74070  | 0.8 | 1.2E-04 |
| TTC23     | tetratricopeptide repeat domain 23                                        | A_24_P65121  | 0.8 | 1.8E-02 |

|             |                                                                                                     |              |     |         |
|-------------|-----------------------------------------------------------------------------------------------------|--------------|-----|---------|
| TMEM121     | transmembrane protein 121                                                                           | A_23_P61987  | 0.8 | 5.1E-04 |
| RBM38       | RNA binding motif protein 38                                                                        | A_23_P17430  | 0.8 | 7.1E-05 |
| SUSD3       | sushi domain containing 3                                                                           | A_23_P401076 | 0.8 | 6.6E-04 |
| HHIPL2      | HHIP-like 2                                                                                         | A_23_P86064  | 0.8 | 1.3E-02 |
| MLF1        | myeloid leukemia factor 1                                                                           | A_24_P345679 | 0.8 | 2.1E-02 |
| TRIM36      | tripartite motif containing 36                                                                      | A_24_P363134 | 0.8 | 2.2E-02 |
| SLITRK5     | SLIT and NTRK-like family, member 5                                                                 | A_24_P102293 | 0.8 | 3.9E-02 |
| TNFRSF4     | tumor necrosis factor receptor superfamily, member 4                                                | A_32_P26092  | 0.8 | 1.0E-02 |
| MTHFD1L     | methylenetetrahydrofolate dehydrogenase (NADP+ dependent) 1-like                                    | A_32_P135243 | 0.8 | 3.5E-03 |
| CD163L1     | CD163 molecule-like 1                                                                               | A_23_P61466  | 0.8 | 3.9E-02 |
| MFSD6L      | major facilitator superfamily domain containing 6-like                                              | A_23_P340218 | 0.8 | 2.8E-02 |
| C5orf13     | chromosome 5 open reading frame 13                                                                  | A_32_P98423  | 0.8 | 3.0E-02 |
| LHX2        | LIM homeobox 2                                                                                      | A_23_P32165  | 0.8 | 3.0E-03 |
| GPT2        | glutamic pyruvate transaminase (alanine aminotransferase) 2                                         | A_23_P37892  | 0.8 | 1.5E-03 |
| NCRNA00256A | non-protein coding RNA 256A                                                                         | A_32_P99347  | 0.8 | 4.8E-03 |
| TESC        | tescalcin                                                                                           | A_23_P76538  | 0.8 | 5.5E-04 |
| PRG2        | proteoglycan 2, bone marrow (natural killer cell activator, eosinophil granule major basic protein) | A_23_P218002 | 0.8 | 4.0E-03 |
| PLEK2       | pleckstrin 2                                                                                        | A_23_P151506 | 0.8 | 7.6E-05 |
| RND3        | Rho family GTPase 3                                                                                 | A_23_P142849 | 0.8 | 7.2E-05 |
| IFITM1      | interferon induced transmembrane protein 1 (9-27)                                                   | A_23_P72737  | 0.8 | 3.9E-05 |
| GLIS1       | GLIS family zinc finger 1                                                                           | A_23_P316612 | 0.8 | 3.3E-04 |
| MC1R        | melanocortin 1 receptor (alpha melanocyte stimulating hormone receptor)                             | A_23_P329271 | 0.8 | 7.3E-04 |
| HS6ST1      | heparan sulfate 6-O-sulfotransferase 1                                                              | A_23_P90587  | 0.8 | 1.5E-03 |
| CD248       | CD248 molecule, endosialin                                                                          | A_23_P52697  | 0.8 | 3.9E-03 |
| CYTIP       | cytohesin 1 interacting protein                                                                     | A_23_P90626  | 0.8 | 2.7E-02 |
| UCHL1       | ubiquitin carboxyl-terminal esterase L1 (ubiquitin thiolesterase)                                   | A_23_P132956 | 0.8 | 2.6E-02 |
| ASPHD1      | aspartate beta-hydroxylase domain containing 1                                                      | A_23_P170667 | 0.8 | 1.7E-02 |
| CALML4      | calmodulin-like 4                                                                                   | A_23_P129188 | 0.8 | 2.8E-02 |
| RASL11B     | RAS-like, family 11, member B                                                                       | A_23_P69738  | 0.8 | 3.0E-02 |
| MFSD4       | major facilitator superfamily domain containing 4                                                   | A_24_P51115  | 0.8 | 3.9E-02 |
| FAM69A      | family with sequence similarity 69, member A                                                        | A_24_P246406 | 0.8 | 8.6E-03 |
| MEX3B       | mex-3 homolog B (C. elegans)                                                                        | A_24_P65060  | 0.8 | 8.3E-03 |
| MDFI        | MyoD family inhibitor                                                                               | A_23_P42168  | 0.8 | 9.8E-04 |
| FBXO32      | F-box protein 32                                                                                    | A_23_P82814  | 0.8 | 5.3E-03 |
| AQP5        | aquaporin 5                                                                                         | A_23_P366812 | 0.8 | 1.0E-02 |
| SH2D2A      | SH2 domain containing 2A                                                                            | A_23_P160618 | 0.8 | 1.5E-03 |
| CTSL2       | cathepsin L2                                                                                        | A_23_P146456 | 0.8 | 1.4E-02 |
| ADAM19      | ADAM metalloproteinase domain 19                                                                    | A_23_P374082 | 0.8 | 1.3E-03 |

|              |                                                                                               |              |     |         |
|--------------|-----------------------------------------------------------------------------------------------|--------------|-----|---------|
| GPX7         | glutathione peroxidase 7                                                                      | A_24_P418816 | 0.8 | 7.1E-04 |
| SLC16A14     | solute carrier family 16, member 14<br>(monocarboxylic acid transporter 14)                   | A_24_P342829 | 0.8 | 1.7E-02 |
| LOC100126784 | hypothetical LOC100126784                                                                     | A_32_P187651 | 0.8 | 1.7E-02 |
| TNFRSF6B     | tumor necrosis factor receptor superfamily,<br>member 6b, decoy                               | A_23_P218646 | 0.8 | 1.7E-02 |
| SPEG         | SPEG complex locus                                                                            | A_23_P338919 | 0.8 | 3.8E-02 |
| CTNNA2       | catenin (cadherin-associated protein), alpha 2                                                | A_23_P84736  | 0.8 | 2.8E-02 |
| ATP1B1       | ATPase, Na <sup>+</sup> /K <sup>+</sup> transporting, beta 1 polypeptide                      | A_32_P4647   | 0.8 | 2.8E-02 |
| DOCK10       | dedicator of cytokinesis 10                                                                   | A_24_P391811 | 0.8 | 4.4E-02 |
| C10orf114    | chromosome 10 open reading frame 114                                                          | A_32_P86739  | 0.8 | 2.1E-03 |
| GNL3         | guanine nucleotide binding protein-like 3<br>(nucleolar)                                      | A_23_P41025  | 0.8 | 3.8E-04 |
| SPNS3        | spinster homolog 3 (Drosophila)                                                               | A_23_P100963 | 0.8 | 3.3E-07 |
| LOC728175    | hypothetical LOC728175                                                                        | A_23_P379111 | 0.8 | 8.8E-03 |
| ESPN         | espin                                                                                         | A_32_P901770 | 0.8 | 2.2E-02 |
| SLC7A1       | solute carrier family 7 (cationic amino acid<br>transporter, y <sup>+</sup> system), member 1 | A_24_P253251 | 0.8 | 1.5E-03 |
| STARD5       | StAR-related lipid transfer (START) domain<br>containing 5                                    | A_23_P158880 | 0.8 | 3.1E-04 |
| PVRL4        | poliovirus receptor-related 4                                                                 | A_23_P46441  | 0.8 | 3.9E-04 |
| GPR172B      | G protein-coupled receptor 172B                                                               | A_23_P15692  | 0.8 | 3.9E-03 |
| EID3         | EP300 interacting inhibitor of differentiation 3                                              | A_23_P65068  | 0.8 | 2.0E-05 |
| PTGER4       | prostaglandin E receptor 4 (subtype EP4)                                                      | A_23_P435394 | 0.8 | 7.2E-03 |
| FAAH2        | fatty acid amide hydrolase 2                                                                  | A_23_P113471 | 0.8 | 4.1E-03 |
| RGMA         | RGM domain family, member A                                                                   | A_23_P372308 | 0.8 | 2.9E-03 |
| ERO1LB       | ERO1-like beta ( <i>S. cerevisiae</i> )                                                       | A_23_P347618 | 0.8 | 4.5E-03 |
| ALDH18A1     | aldehyde dehydrogenase 18 family, member A1                                                   | A_23_P1361   | 0.8 | 1.1E-06 |
| SLC4A3       | solute carrier family 4, anion exchanger, member 3                                            | A_23_P39647  | 0.8 | 4.7E-04 |
| GM2A         | GM2 ganglioside activator                                                                     | A_24_P925314 | 0.8 | 3.7E-02 |
| TNFAIP3      | tumor necrosis factor, alpha-induced protein 3                                                | A_24_P166527 | 0.8 | 3.6E-02 |
| C6orf225     | chromosome 6 open reading frame 225                                                           | A_24_P756657 | 0.8 | 3.4E-02 |
| MGC16142     | hypothetical protein MGC16142                                                                 | A_24_P4036   | 0.8 | 1.6E-02 |
| KLHL34       | kelch-like 34 (Drosophila)                                                                    | A_23_P428887 | 0.8 | 3.4E-04 |
| LEPREL2      | leprecan-like 2                                                                               | A_23_P87752  | 0.8 | 5.7E-04 |
| DIRAS2       | DIRAS family, GTP-binding RAS-like 2                                                          | A_23_P20660  | 0.8 | 1.8E-02 |
| SYTL1        | synaptotagmin-like 1                                                                          | A_32_P217773 | 0.8 | 2.5E-04 |
| BMP8A        | bone morphogenetic protein 8a                                                                 | A_23_P85922  | 0.8 | 2.1E-02 |
| GEN1         | Gen homolog 1, endonuclease (Drosophila)                                                      | A_24_P920968 | 0.8 | 1.0E-02 |
| ASB4         | ankyrin repeat and SOCS box containing 4                                                      | A_23_P501319 | 0.8 | 8.7E-03 |
| DZIP1        | DAZ interacting protein 1                                                                     | A_23_P14157  | 0.8 | 1.1E-04 |
| ZC3H12A      | zinc finger CCCH-type containing 12A                                                          | A_23_P326160 | 0.8 | 2.7E-02 |
| LOC388242    | coiled-coil domain containing 101 pseudogene                                                  | A_32_P135336 | 0.8 | 2.2E-04 |
| DES          | desmin                                                                                        | A_23_P90710  | 0.8 | 1.4E-02 |

|           |                                                                                        |              |     |         |
|-----------|----------------------------------------------------------------------------------------|--------------|-----|---------|
| NT5E      | 5'-nucleotidase, ecto (CD73)                                                           | A_24_P316430 | 0.8 | 6.7E-03 |
| KRT12     | keratin 12                                                                             | A_23_P55448  | 0.8 | 2.6E-02 |
| ZNF790    | zinc finger protein 790                                                                | A_24_P919279 | 0.8 | 2.8E-06 |
| TMEM71    | transmembrane protein 71                                                               | A_23_P321354 | 0.8 | 1.4E-02 |
| TUBB2A    | tubulin, beta 2A                                                                       | A_23_P19291  | 0.8 | 4.2E-04 |
| SOX8      | SRY (sex determining region Y)-box 8                                                   | A_23_P66137  | 0.8 | 2.9E-04 |
| TGFBI     | transforming growth factor, beta-induced, 68kDa                                        | A_23_P156327 | 0.8 | 1.9E-03 |
| FAM38B    | family with sequence similarity 38, member B                                           | A_23_P130376 | 0.8 | 2.4E-02 |
| ANKH      | ankylosis, progressive homolog (mouse)                                                 | A_24_P371628 | 0.8 | 5.8E-05 |
| XBP1      | X-box binding protein 1                                                                | A_24_P100228 | 0.8 | 2.8E-03 |
| FBLIM1    | filamin binding LIM protein 1                                                          | A_23_P337934 | 0.8 | 1.2E-03 |
| AEBP1     | AE binding protein 1                                                                   | A_23_P145916 | 0.8 | 1.3E-02 |
| ACTG2     | actin, gamma 2, smooth muscle, enteric                                                 | A_23_P39955  | 0.8 | 2.0E-02 |
| GLIPR1    | GLI pathogenesis-related 1                                                             | A_24_P390096 | 0.8 | 6.5E-03 |
| VWA1      | von Willebrand factor A domain containing 1                                            | A_23_P86089  | 0.8 | 2.1E-06 |
| GPR114    | G protein-coupled receptor 114                                                         | A_23_P206290 | 0.8 | 1.5E-03 |
| CDH11     | cadherin 11, type 2, OB-cadherin (osteoblast)                                          | A_23_P152305 | 0.8 | 8.4E-03 |
| PTH2R     | parathyroid hormone 2 receptor                                                         | A_24_P457628 | 0.8 | 1.6E-02 |
| SEMA3A    | sema domain, immunoglobulin domain (Ig), short basic domain, secreted, (semaphorin) 3A | A_24_P192301 | 0.8 | 9.6E-03 |
| GOLGA3    | golgin A3                                                                              | A_23_P98864  | 0.7 | 2.8E-03 |
| SYNGR1    | synaptogyrin 1                                                                         | A_23_P211522 | 0.7 | 1.1E-05 |
| LOC730495 | hypothetical protein LOC730495                                                         | A_32_P145769 | 0.7 | 4.8E-02 |
| BYSL      | bystin-like                                                                            | A_23_P145197 | 0.7 | 1.4E-03 |
| SLC9A3R1  | solute carrier family 9 (sodium/hydrogen exchanger), member 3 regulator 1              | A_23_P308519 | 0.7 | 5.6E-05 |
| GATM      | glycine amidinotransferase (L-arginine:glycine amidinotransferase)                     | A_23_P129064 | 0.7 | 9.8E-03 |
| TNFRSF12A | tumor necrosis factor receptor superfamily, member 12A                                 | A_23_P49338  | 0.7 | 4.8E-02 |
| DCX       | doublecortin                                                                           | A_23_P500328 | 0.7 | 3.2E-02 |
| NKX6-1    | NK6 homeobox 1                                                                         | A_24_P68991  | 0.7 | 1.7E-02 |
| PTPRH     | protein tyrosine phosphatase, receptor type, H                                         | A_23_P101642 | 0.7 | 4.6E-03 |
| SOAT2     | sterol O-acyltransferase 2                                                             | A_23_P25475  | 0.7 | 3.9E-03 |
| KCNK2     | potassium channel, subfamily K, member 2                                               | A_23_P43713  | 0.7 | 3.4E-02 |
| UBQLN1    | ubiquilin 1                                                                            | A_24_P338121 | 0.7 | 3.0E-02 |
| CDCP1     | CUB domain containing protein 1                                                        | A_23_P113613 | 0.7 | 8.9E-04 |
| DSP       | desmoplakin                                                                            | A_32_P127566 | 0.7 | 3.5E-02 |
| FBXL21    | F-box and leucine-rich repeat protein 21 (gene/pseudogene)                             | A_23_P167723 | 0.7 | 2.5E-02 |
| PNMA3     | paraneoplastic antigen MA3                                                             | A_23_P22422  | 0.7 | 4.8E-03 |
| SEMA3C    | sema domain, immunoglobulin domain (Ig), short basic domain, secreted, (semaphorin) 3C | A_23_P256473 | 0.7 | 3.2E-05 |
| MGC16121  | hypothetical protein MGC16121                                                          | A_23_P159986 | 0.7 | 2.9E-02 |
| DEF6      | differentially expressed in FDCP 6 homolog (mouse)                                     | A_23_P321913 | 0.7 | 1.6E-04 |

|           |                                                                                  |              |     |         |
|-----------|----------------------------------------------------------------------------------|--------------|-----|---------|
| MICALL2   | MICAL-like 2                                                                     | A_24_P303524 | 0.7 | 2.9E-05 |
| ATAD3B    | ATPase family, AAA domain containing 3B                                          | A_23_P302750 | 0.7 | 9.9E-03 |
| TGFB2     | transforming growth factor, beta 2                                               | A_24_P402438 | 0.7 | 1.7E-02 |
| IFI16     | interferon, gamma-inducible protein 16                                           | A_23_P217866 | 0.7 | 5.5E-05 |
| AKR1D1    | aldo-keto reductase family 1, member D1 (delta 4-3-ketosteroid-5-beta-reductase) | A_23_P255185 | 0.7 | 3.8E-02 |
| KIAA0802  | KIAA0802                                                                         | A_23_P360605 | 0.7 | 1.3E-02 |
| RNF122    | ring finger protein 122                                                          | A_23_P134744 | 0.7 | 1.1E-02 |
| RFK       | riboflavin kinase                                                                | A_23_P216708 | 0.7 | 7.1E-06 |
| COL16A1   | collagen, type XVI, alpha 1                                                      | A_23_P160318 | 0.7 | 4.2E-03 |
| RRAD      | Ras-related associated with diabetes                                             | A_23_P88849  | 0.7 | 7.1E-03 |
| LOC388630 | UPF0632 protein A                                                                | A_32_P121079 | 0.7 | 6.1E-03 |
| FAM75A2   | family with sequence similarity 75, member A2                                    | A_23_P435874 | 0.7 | 4.6E-02 |
| BASP1     | brain abundant, membrane attached signal protein 1                               | A_23_P213385 | 0.7 | 7.2E-04 |
| CCDC83    | coiled-coil domain containing 83                                                 | A_23_P356667 | 0.7 | 4.2E-02 |
| PLK4      | polo-like kinase 4                                                               | A_24_P912925 | 0.7 | 4.8E-02 |
| CYP4F22   | cytochrome P450, family 4, subfamily F, polypeptide 22                           | A_24_P331150 | 0.7 | 7.3E-03 |
| KIAA0930  | KIAA0930                                                                         | A_24_P944751 | 0.7 | 8.5E-04 |
| RET       | ret proto-oncogene                                                               | A_24_P343695 | 0.7 | 9.9E-03 |
| KAZALD1   | Kazal-type serine peptidase inhibitor domain 1                                   | A_23_P421011 | 0.7 | 4.5E-03 |
| CCL3      | chemokine (C-C motif) ligand 3                                                   | A_23_P373017 | 0.7 | 3.4E-02 |
| TMEM70    | transmembrane protein 70                                                         | A_23_P253963 | 0.7 | 4.3E-04 |
| SLC16A2   | solute carrier family 16, member 2 (monocarboxylic acid transporter 8)           | A_23_P137097 | 0.7 | 6.4E-04 |
| STX1A     | syntaxin 1A (brain)                                                              | A_24_P226541 | 0.7 | 1.4E-02 |
| TSHZ3     | teashirt zinc finger homeobox 3                                                  | A_23_P361014 | 0.7 | 3.0E-04 |
| FILIP1L   | filamin A interacting protein 1-like                                             | A_23_P252052 | 0.7 | 3.1E-03 |
| THPO      | thrombopoietin                                                                   | A_23_P121459 | 0.7 | 1.6E-02 |
| GPR68     | G protein-coupled receptor 68                                                    | A_24_P931443 | 0.7 | 1.1E-02 |
| ITGB4     | integrin, beta 4                                                                 | A_23_P66355  | 0.7 | 3.9E-03 |
| SEC11C    | SEC11 homolog C ( <i>S. cerevisiae</i> )                                         | A_23_P208009 | 0.7 | 3.2E-03 |
| CROT      | carnitine O-octanoyltransferase                                                  | A_23_P168669 | 0.7 | 3.3E-03 |
| GPR137B   | G protein-coupled receptor 137B                                                  | A_23_P46149  | 0.7 | 7.2E-04 |
| CCDC3     | coiled-coil domain containing 3                                                  | A_24_P369232 | 0.7 | 1.4E-02 |
| TMEM182   | transmembrane protein 182                                                        | A_23_P328000 | 0.7 | 4.3E-03 |
| SALL4     | sal-like 4 ( <i>Drosophila</i> )                                                 | A_23_P109072 | 0.7 | 1.1E-03 |
| TCF7      | transcription factor 7 (T-cell specific, HMG-box)                                | A_23_P7582   | 0.7 | 3.7E-04 |
| IL5RA     | interleukin 5 receptor, alpha                                                    | A_23_P500676 | 0.7 | 1.2E-02 |
| PITPNM1   | phosphatidylinositol transfer protein, membrane-associated 1                     | A_23_P1519   | 0.7 | 2.5E-04 |
| IL4       | interleukin 4                                                                    | A_23_P213706 | 0.7 | 1.4E-02 |
| CCDC138   | coiled-coil domain containing 138                                                | A_24_P879711 | 0.7 | 1.9E-02 |

|          |                                                                                    |              |     |         |
|----------|------------------------------------------------------------------------------------|--------------|-----|---------|
| IGFBPL1  | insulin-like growth factor binding protein-like 1                                  | A_24_P132703 | 0.7 | 1.2E-02 |
| CGREF1   | cell growth regulator with EF-hand domain 1                                        | A_23_P403445 | 0.7 | 1.8E-02 |
| ADAMTSL1 | ADAMTS-like 1                                                                      | A_23_P312415 | 0.7 | 1.7E-02 |
| IGHM     | immunoglobulin heavy constant mu                                                   | A_24_P417352 | 0.7 | 1.2E-03 |
| FNDC5    | fibronectin type III domain containing 5                                           | A_23_P420326 | 0.7 | 3.9E-03 |
| APOBEC3C | apolipoprotein B mRNA editing enzyme, catalytic polypeptide-like 3C                | A_23_P120931 | 0.7 | 3.4E-04 |
| APOBEC3F | apolipoprotein B mRNA editing enzyme, catalytic polypeptide-like 3F                | A_23_P357101 | 0.7 | 5.6E-04 |
| COL25A1  | collagen, type XXV, alpha 1                                                        | A_32_P405010 | 0.7 | 4.5E-02 |
| PRRT2    | proline-rich transmembrane protein 2                                               | A_23_P66017  | 0.7 | 1.6E-02 |
| LRIG3    | leucine-rich repeats and immunoglobulin-like domains 3                             | A_23_P47885  | 0.7 | 1.6E-02 |
| PPM1H    | protein phosphatase, Mg <sup>2+</sup> /Mn <sup>2+</sup> dependent, 1H              | A_23_P391443 | 0.7 | 3.4E-02 |
| MESP1    | mesoderm posterior 1 homolog (mouse)                                               | A_23_P77223  | 0.7 | 4.1E-02 |
| EPHA8    | EPH receptor A8                                                                    | A_24_P419239 | 0.7 | 2.5E-02 |
| PDCD4    | programmed cell death 4 (neoplastic transformation inhibitor)                      | A_23_P9932   | 0.7 | 2.0E-04 |
| LGALS12  | lectin, galactoside-binding, soluble, 12                                           | A_23_P139198 | 0.7 | 1.6E-02 |
| LIMD2    | LIM domain containing 2                                                            | A_23_P26824  | 0.7 | 3.4E-03 |
| KIF7     | kinesin family member 7                                                            | A_24_P203689 | 0.7 | 1.3E-03 |
| FUT8     | fucosyltransferase 8 (alpha (1,6) fucosyltransferase)                              | A_23_P313632 | 0.7 | 1.0E-04 |
| PRDM9    | PR domain containing 9                                                             | A_24_P217628 | 0.7 | 4.1E-02 |
| KCNMA1   | potassium large conductance calcium-activated channel, subfamily M, alpha member 1 | A_32_P181222 | 0.7 | 4.7E-02 |
| BATF3    | basic leucine zipper transcription factor, ATF-like 3                              | A_23_P160720 | 0.7 | 1.8E-02 |
| ZNF267   | zinc finger protein 267                                                            | A_23_P66260  | 0.7 | 1.7E-04 |
| KCNC1    | potassium voltage-gated channel, Shaw-related subfamily, member 1                  | A_23_P203439 | 0.7 | 4.4E-02 |
| TDP1     | tyrosyl-DNA phosphodiesterase 1                                                    | A_23_P117623 | 0.7 | 1.8E-05 |
| MFAP4    | microfibrillar-associated protein 4                                                | A_23_P164057 | 0.7 | 1.3E-02 |
| FYB      | FYN binding protein                                                                | A_24_P393740 | 0.7 | 3.9E-02 |
| IGFBP2   | insulin-like growth factor binding protein 2, 36kDa                                | A_23_P119943 | 0.7 | 1.2E-02 |
| LOXL2    | lysyl oxidase-like 2                                                               | A_23_P111995 | 0.7 | 7.3E-03 |
| XPR1     | xenotropic and polytropic retrovirus receptor 1                                    | A_23_P63534  | 0.7 | 2.5E-04 |
| DMP1     | dentin matrix acidic phosphoprotein 1                                              | A_23_P133153 | 0.7 | 3.4E-02 |
| MEX3C    | mex-3 homolog C (C. elegans)                                                       | A_24_P416543 | 0.7 | 8.9E-03 |
| METTL1   | methyltransferase like 1                                                           | A_23_P47788  | 0.7 | 1.6E-03 |
| ALX1     | ALX homeobox 1                                                                     | A_23_P83798  | 0.7 | 4.6E-02 |
| STRA6    | stimulated by retinoic acid gene 6 homolog (mouse)                                 | A_23_P65779  | 0.7 | 3.1E-03 |
| RCAN2    | regulator of calcineurin 2                                                         | A_32_P156851 | 0.7 | 4.8E-04 |
| SNAPC1   | small nuclear RNA activating complex, polypeptide 1, 43kDa                         | A_23_P37244  | 0.7 | 2.5E-04 |
| C5orf35  | chromosome 5 open reading frame 35                                                 | A_23_P433111 | 0.7 | 2.3E-03 |
| DUSP4    | dual specificity phosphatase 4                                                     | A_23_P134935 | 0.7 | 1.9E-04 |

|           |                                                                            |              |     |         |
|-----------|----------------------------------------------------------------------------|--------------|-----|---------|
| SORD      | sorbitol dehydrogenase                                                     | A_32_P127153 | 0.7 | 8.7E-03 |
| DGKE      | diacylglycerol kinase, epsilon 64kDa                                       | A_24_P916927 | 0.7 | 4.4E-02 |
| IL33      | interleukin 33                                                             | A_23_P31945  | 0.7 | 5.4E-04 |
| N4BP2L1   | NEDD4 binding protein 2-like 1                                             | A_23_P88067  | 0.7 | 4.2E-02 |
| DQX1      | DEAQ box RNA-dependent ATPase 1                                            | A_23_P56659  | 0.7 | 1.5E-02 |
| CHEK1     | CHK1 checkpoint homolog ( <i>S. pombe</i> )                                | A_23_P116123 | 0.7 | 3.5E-02 |
| MYBL1     | v-myb myeloblastosis viral oncogene homolog (avian)-like 1                 | A_23_P43157  | 0.7 | 5.1E-03 |
| PCDHB14   | protocadherin beta 14                                                      | A_23_P133236 | 0.7 | 1.7E-03 |
| C1QTNF2   | C1q and tumor necrosis factor related protein 2                            | A_23_P92903  | 0.7 | 2.2E-02 |
| GDF3      | growth differentiation factor 3                                            | A_23_P72817  | 0.7 | 4.4E-02 |
| EPX       | eosinophil peroxidase                                                      | A_23_P89192  | 0.7 | 8.8E-03 |
| TSPAN6    | tetraspanin 6                                                              | A_24_P83262  | 0.7 | 3.2E-02 |
| LOC727916 | hypothetical protein LOC727916                                             | A_32_P120791 | 0.7 | 6.4E-03 |
| ITPKA     | inositol 1,4,5-trisphosphate 3-kinase A                                    | A_23_P65918  | 0.7 | 2.7E-03 |
| VASN      | vasorin                                                                    | A_23_P129695 | 0.7 | 2.2E-03 |
| GPRASP1   | G protein-coupled receptor associated sorting protein 1                    | A_23_P96590  | 0.7 | 7.1E-03 |
| CPNE7     | copine VII                                                                 | A_23_P26426  | 0.7 | 4.5E-03 |
| KCNJ14    | potassium inwardly-rectifying channel, subfamily J, member 14              | A_23_P130764 | 0.7 | 9.5E-03 |
| GPR124    | G protein-coupled receptor 124                                             | A_23_P43283  | 0.7 | 8.2E-03 |
| HIVEP2    | human immunodeficiency virus type 1 enhancer binding protein 2             | A_23_P214766 | 0.7 | 1.1E-03 |
| TSKU      | tsukushi small leucine rich proteoglycan homolog ( <i>Xenopus laevis</i> ) | A_23_P162142 | 0.7 | 7.0E-05 |
| ARHGAP39  | Rho GTPase activating protein 39                                           | A_23_P424878 | 0.7 | 3.8E-02 |
| BHLHE41   | basic helix-loop-helix family, member e41                                  | A_23_P139500 | 0.7 | 4.8E-03 |
| SLC29A3   | solute carrier family 29 (nucleoside transporters), member 3               | A_23_P46871  | 0.7 | 9.8E-03 |
| SLC30A1   | solute carrier family 30 (zinc transporter), member 1                      | A_23_P23815  | 0.7 | 9.3E-04 |
| UCP2      | uncoupling protein 2 (mitochondrial, proton carrier)                       | A_23_P47704  | 0.7 | 5.3E-04 |
| PPP1R14C  | protein phosphatase 1, regulatory (inhibitor) subunit 14C                  | A_23_P45011  | 0.7 | 3.9E-02 |
| FIGNL1    | figletin-like 1                                                            | A_23_P302681 | 0.7 | 2.2E-02 |
| C16orf75  | chromosome 16 open reading frame 75                                        | A_23_P353717 | 0.7 | 6.5E-03 |
| CYGB      | cytoglobin                                                                 | A_23_P338981 | 0.7 | 1.7E-05 |
| UCK2      | uridine-cytidine kinase 2                                                  | A_23_P487    | 0.7 | 3.8E-04 |
| KLHL25    | kelch-like 25 ( <i>Drosophila</i> )                                        | A_23_P65797  | 0.7 | 4.1E-04 |
| CYSLTR1   | cysteinyl leukotriene receptor 1                                           | A_23_P22660  | 0.7 | 3.0E-05 |
| C1orf190  | chromosome 1 open reading frame 190                                        | A_32_P129010 | 0.7 | 1.4E-02 |
| RPL31     | ribosomal protein L31                                                      | A_24_P105794 | 0.7 | 2.1E-04 |
| LPCAT2    | lysophosphatidylcholine acyltransferase 2                                  | A_23_P141021 | 0.7 | 2.1E-02 |
| IL17B     | interleukin 17B                                                            | A_23_P167479 | 0.7 | 2.5E-02 |
| OBFC2A    | oligonucleotide/oligosaccharide-binding fold                               | A_24_P229531 | 0.7 | 2.4E-02 |

|          |                                                                                         |              |     |         |
|----------|-----------------------------------------------------------------------------------------|--------------|-----|---------|
|          | containing 2A                                                                           |              |     |         |
| METRNL   | meteorin, glial cell differentiation regulator-like                                     | A_23_P10591  | 0.7 | 4.3E-03 |
| C7orf40  | chromosome 7 open reading frame 40                                                      | A_24_P506977 | 0.7 | 6.3E-03 |
| SSR4     | signal sequence receptor, delta (translocon-associated protein delta)                   | A_23_P259172 | 0.7 | 9.7E-03 |
| ADSS     | adenylosuccinate synthase                                                               | A_23_P859    | 0.7 | 2.1E-04 |
| CRIP1    | cysteine-rich protein 1 (intestinal)                                                    | A_23_P44674  | 0.7 | 1.2E-03 |
| PCDHB12  | protocadherin beta 12                                                                   | A_24_P405960 | 0.7 | 9.8E-03 |
| CREB3L2  | cAMP responsive element binding protein 3-like 2                                        | A_24_P180654 | 0.7 | 2.2E-03 |
| PTCD2    | pentatricopeptide repeat domain 2                                                       | A_24_P191847 | 0.7 | 4.4E-02 |
| RGS10    | regulator of G-protein signaling 10                                                     | A_23_P138717 | 0.7 | 1.7E-03 |
| RAP1GAP2 | RAP1 GTPase activating protein 2                                                        | A_24_P911927 | 0.7 | 2.1E-02 |
| GALNTL1  | UDP-N-acetyl-alpha-D-galactosamine:polypeptide N-acetylgalactosaminyltransferase-like 1 | A_23_P76749  | 0.7 | 1.2E-02 |
| TMEM59L  | transmembrane protein 59-like                                                           | A_23_P309155 | 0.7 | 5.3E-03 |
| ARPP21   | cAMP-regulated phosphoprotein, 21kDa                                                    | A_23_P143838 | 0.7 | 4.1E-02 |
| WDR43    | WD repeat domain 43                                                                     | A_23_P344853 | 0.7 | 7.8E-03 |
| FAM19A5  | family with sequence similarity 19 (chemokine (C-C motif)-like), member A5              | A_23_P304489 | 0.7 | 4.0E-02 |
| BID      | BH3 interacting domain death agonist                                                    | A_23_P154929 | 0.7 | 9.4E-04 |
| CCDC140  | coiled-coil domain containing 140                                                       | A_23_P429478 | 0.7 | 1.4E-02 |
| CLEC4C   | C-type lectin domain family 4, member C                                                 | A_23_P2616   | 0.7 | 4.5E-02 |
| HES4     | hairy and enhancer of split 4 (Drosophila)                                              | A_23_P149448 | 0.7 | 4.4E-05 |
| C3       | complement component 3                                                                  | A_23_P101407 | 0.7 | 1.4E-03 |
| GGT6     | gamma-glutamyltransferase 6                                                             | A_23_P66767  | 0.7 | 4.4E-02 |
| MSX2     | msh homeobox 2                                                                          | A_24_P132006 | 0.7 | 4.7E-02 |
| HCST     | hematopoietic cell signal transducer                                                    | A_23_P39386  | 0.7 | 1.7E-03 |
| TNNI2    | troponin I type 2 (skeletal, fast)                                                      | A_23_P24784  | 0.7 | 4.3E-02 |
| DBN1     | drebrin 1                                                                               | A_23_P156284 | 0.7 | 1.0E-03 |
| CD5      | CD5 molecule                                                                            | A_24_P364221 | 0.7 | 1.5E-03 |
| EFNA5    | ephrin-A5                                                                               | A_32_P171200 | 0.7 | 2.1E-02 |
| BCL3     | B-cell CLL/lymphoma 3                                                                   | A_23_P4662   | 0.7 | 2.2E-02 |
| KRT37    | keratin 37                                                                              | A_23_P118854 | 0.7 | 3.1E-02 |
| ZNF141   | zinc finger protein 141                                                                 | A_23_P388867 | 0.6 | 2.0E-02 |
| DNM1     | dynamin 1                                                                               | A_23_P135273 | 0.6 | 3.7E-05 |
| SERINC2  | serine incorporator 2                                                                   | A_23_P147326 | 0.6 | 7.0E-03 |
| SEC24A   | SEC24 family, member A (S. cerevisiae)                                                  | A_23_P329593 | 0.6 | 8.4E-03 |
| FAIM3    | Fas apoptotic inhibitory molecule 3                                                     | A_23_P138125 | 0.6 | 3.0E-04 |
| BCL2     | B-cell CLL/lymphoma 2                                                                   | A_23_P352266 | 0.6 | 1.0E-03 |
| ADORA2B  | adenosine A2b receptor                                                                  | A_23_P55477  | 0.6 | 3.4E-02 |
| BICD1    | bicaudal D homolog 1 (Drosophila)                                                       | A_24_P916586 | 0.6 | 1.8E-02 |
| RAC2     | ras-related C3 botulinum toxin substrate 2 (rho family, small GTP binding protein Rac2) | A_23_P218774 | 0.6 | 7.8E-03 |



|              |                                                                              |              |     |         |
|--------------|------------------------------------------------------------------------------|--------------|-----|---------|
| VPREB3       | pre-B lymphocyte 3                                                           | A_23_P166371 | 0.6 | 1.3E-02 |
| MYO1E        | myosin IE                                                                    | A_23_P37497  | 0.6 | 5.9E-06 |
| LOC100134229 | hypothetical LOC100134229                                                    | A_32_P54503  | 0.6 | 8.1E-03 |
| RAB23        | RAB23, member RAS oncogene family                                            | A_23_P70794  | 0.6 | 1.3E-03 |
| NETO1        | neuropilin (NRP) and tolloid (TLL)-like 1                                    | A_24_P5653   | 0.6 | 3.1E-02 |
| FAM190A      | family with sequence similarity 190, member A                                | A_32_P306678 | 0.6 | 1.4E-02 |
| PIK3CG       | phosphoinositide-3-kinase, catalytic, gamma polypeptide                      | A_23_P251359 | 0.6 | 3.7E-02 |
| TBC1D10C     | TBC1 domain family, member 10C                                               | A_24_P392201 | 0.6 | 4.9E-02 |
| KCNE1L       | KCNE1-like                                                                   | A_23_P256641 | 0.6 | 4.9E-02 |
| TSPAN5       | tetraspanin 5                                                                | A_23_P323930 | 0.6 | 3.8E-04 |
| SMPDL3B      | sphingomyelin phosphodiesterase, acid-like 3B                                | A_23_P160881 | 0.6 | 2.8E-02 |
| TMEM132A     | transmembrane protein 132A                                                   | A_23_P24716  | 0.6 | 1.8E-03 |
| ERF          | Ets2 repressor factor                                                        | A_23_P4679   | 0.6 | 1.3E-03 |
| FCRLB        | Fc receptor-like B                                                           | A_23_P350574 | 0.6 | 3.1E-02 |
| MYPN         | myopalladin                                                                  | A_24_P376120 | 0.6 | 5.0E-02 |
| SELM         | selenoprotein M                                                              | A_23_P6413   | 0.6 | 6.4E-05 |
| DGKA         | diacylglycerol kinase, alpha 80kDa                                           | A_24_P84834  | 0.6 | 3.6E-04 |
| EAF1         | ELL associated factor 1                                                      | A_24_P174461 | 0.6 | 3.7E-02 |
| GATS         | GATS, stromal antigen 3 opposite strand                                      | A_23_P327777 | 0.6 | 2.8E-02 |
| BAG2         | BCL2-associated athanogene 2                                                 | A_23_P356554 | 0.6 | 7.4E-03 |
| HAGHL        | hydroxyacylglutathione hydrolase-like                                        | A_24_P356373 | 0.6 | 1.3E-02 |
| RNF150       | ring finger protein 150                                                      | A_24_P350589 | 0.6 | 1.8E-02 |
| EIF5A2       | eukaryotic translation initiation factor 5A2                                 | A_24_P385739 | 0.6 | 4.6E-04 |
| TCF3         | transcription factor 3 (E2A immunoglobulin enhancer binding factors E12/E47) | A_23_P67708  | 0.6 | 4.5E-05 |
| TMEM98       | transmembrane protein 98                                                     | A_23_P27040  | 0.6 | 2.7E-04 |
| USP9Y        | ubiquitin specific peptidase 9, Y-linked                                     | A_23_P137226 | 0.6 | 4.2E-02 |
| QSER1        | glutamine and serine rich 1                                                  | A_23_P139059 | 0.6 | 4.3E-02 |
| HIVEP1       | human immunodeficiency virus type I enhancer binding protein 1               | A_23_P19619  | 0.6 | 1.1E-04 |
| CD8B         | CD8b molecule                                                                | A_23_P357881 | 0.6 | 5.0E-02 |
| TPM4         | tropomyosin 4                                                                | A_24_P82880  | 0.6 | 8.5E-03 |
| E2F3         | E2F transcription factor 3                                                   | A_23_P385034 | 0.6 | 2.0E-03 |
| LOC202781    | hypothetical LOC202781                                                       | A_24_P934284 | 0.6 | 3.2E-02 |
| LRP12        | low density lipoprotein receptor-related protein 12                          | A_23_P8906   | 0.6 | 1.7E-03 |
| PTP4A3       | protein tyrosine phosphatase type IVA, member 3                              | A_23_P112774 | 0.6 | 3.2E-03 |
| CHST8        | carbohydrate (N-acetylgalactosamine 4-0) sulfotransferase 8                  | A_23_P90273  | 0.6 | 7.9E-04 |
| TMEM176A     | transmembrane protein 176A                                                   | A_23_P252082 | 0.6 | 1.1E-03 |
| CLEC11A      | C-type lectin domain family 11, member A                                     | A_23_P153489 | 0.6 | 1.6E-03 |
| GPSM3        | G-protein signaling modulator 3                                              | A_24_P230521 | 0.6 | 3.7E-02 |
| FMO1         | flavin containing monooxygenase 1                                            | A_23_P149613 | 0.6 | 2.5E-03 |

|           |                                                                               |              |     |         |
|-----------|-------------------------------------------------------------------------------|--------------|-----|---------|
| STK17A    | serine/threonine kinase 17a                                                   | A_23_P82550  | 0.6 | 2.4E-03 |
| TMSB15B   | thymosin beta 15B                                                             | A_32_P85593  | 0.6 | 2.3E-03 |
| ENPP5     | ectonucleotide pyrophosphatase/phosphodiesterase 5 (putative)                 | A_23_P214244 | 0.6 | 4.3E-02 |
| ACTBL2    | actin, beta-like 2                                                            | A_24_P6903   | 0.6 | 3.3E-02 |
| EFNA4     | ephrin-A4                                                                     | A_23_P322    | 0.6 | 1.5E-04 |
| C1QTNF6   | C1q and tumor necrosis factor related protein 6                               | A_24_P211565 | 0.6 | 3.2E-02 |
| NOLC1     | nucleolar and coiled-body phosphoprotein 1                                    | A_23_P314151 | 0.6 | 7.8E-03 |
| C3orf51   | chromosome 3 open reading frame 51                                            | A_23_P18053  | 0.6 | 3.0E-02 |
| NINJ1     | ninjurin 1                                                                    | A_23_P169137 | 0.6 | 4.6E-03 |
| DYRK2     | dual-specificity tyrosine-(Y)-phosphorylation regulated kinase 2              | A_24_P942786 | 0.6 | 8.3E-05 |
| SPERT     | spermatid associated                                                          | A_32_P56604  | 0.6 | 3.8E-02 |
| HSPA13    | heat shock protein 70kDa family, member 13                                    | A_23_P17606  | 0.6 | 4.0E-02 |
| ACTN3     | actinin, alpha 3                                                              | A_23_P138881 | 0.6 | 2.3E-02 |
| FAM102A   | family with sequence similarity 102, member A                                 | A_23_P112531 | 0.6 | 1.7E-05 |
| KIRREL    | kin of IRRE like (Drosophila)                                                 | A_24_P393312 | 0.6 | 1.8E-03 |
| SEC24D    | SEC24 family, member D ( <i>S. cerevisiae</i> )                               | A_23_P159382 | 0.6 | 1.5E-04 |
| WDR35     | WD repeat domain 35                                                           | A_23_P108463 | 0.6 | 4.0E-03 |
| DPF3      | D4, zinc and double PHD fingers, family 3                                     | A_24_P270424 | 0.6 | 1.7E-02 |
| CERK      | ceramide kinase                                                               | A_23_P211659 | 0.6 | 7.3E-03 |
| CHN2      | chimerin (chimaerin) 2                                                        | A_24_P277875 | 0.6 | 4.2E-02 |
| CHSY3     | chondroitin sulfate synthase 3                                                | A_23_P368886 | 0.6 | 2.3E-02 |
| PAM       | peptidylglycine alpha-amidating monooxygenase                                 | A_24_P933704 | 0.6 | 1.5E-04 |
| KIF2A     | kinesin heavy chain member 2A                                                 | A_23_P254091 | 0.6 | 5.8E-05 |
| C12orf45  | chromosome 12 open reading frame 45                                           | A_23_P128532 | 0.6 | 3.5E-05 |
| ZCCHC18   | zinc finger, CCHC domain containing 18                                        | A_32_P116989 | 0.6 | 1.8E-03 |
| ARL5B     | ADP-ribosylation factor-like 5B                                               | A_24_P943997 | 0.6 | 1.9E-02 |
| RAP2B     | RAP2B, member of RAS oncogene family                                          | A_24_P123052 | 0.6 | 3.7E-03 |
| TIMP2     | TIMP metalloproteinase inhibitor 2                                            | A_24_P169896 | 0.6 | 4.8E-02 |
| FGFR1OP   | FGFR1 oncogene partner                                                        | A_23_P145134 | 0.6 | 4.2E-04 |
| RNF19B    | ring finger protein 19B                                                       | A_23_P321388 | 0.6 | 1.8E-03 |
| MARCH3    | membrane-associated ring finger (C3HC4) 3                                     | A_23_P321511 | 0.6 | 2.7E-02 |
| PLEKHG1   | pleckstrin homology domain containing, family G (with RhoGef domain) member 1 | A_24_P6517   | 0.6 | 2.3E-03 |
| C14orf182 | chromosome 14 open reading frame 182                                          | A_24_P263910 | 0.6 | 1.7E-02 |
| KRT40     | keratin 40                                                                    | A_24_P280333 | 0.6 | 4.5E-02 |
| BBS5      | Bardet-Biedl syndrome 5                                                       | A_23_P5785   | 0.6 | 1.2E-02 |
| RPRM      | reprimin, TP53 dependent G2 arrest mediator candidate                         | A_23_P5370   | 0.6 | 2.9E-02 |
| RHOD      | ras homolog gene family, member D                                             | A_23_P1523   | 0.6 | 8.0E-03 |
| ARHGAP20  | Rho GTPase activating protein 20                                              | A_23_P422933 | 0.6 | 4.0E-03 |
| FAM9C     | family with sequence similarity 9, member C                                   | A_32_P133892 | 0.6 | 4.7E-02 |

|              |                                                                                                   |              |     |         |
|--------------|---------------------------------------------------------------------------------------------------|--------------|-----|---------|
| FAM20A       | family with sequence similarity 20, member A                                                      | A_32_P108254 | 0.6 | 1.7E-02 |
| DENND5B      | DENN/MADD domain containing 5B                                                                    | A_23_P366559 | 0.6 | 4.1E-02 |
| CHRD         | chordin                                                                                           | A_24_P117725 | 0.6 | 8.4E-03 |
| SKIL         | SKI-like oncogene                                                                                 | A_23_P351215 | 0.6 | 4.5E-03 |
| SLC39A6      | solute carrier family 39 (zinc transporter), member 6                                             | A_24_P156049 | 0.6 | 3.5E-04 |
| PCDHB7       | protocadherin beta 7                                                                              | A_24_P243373 | 0.6 | 3.7E-03 |
| CHN1         | chimerin (chimaerin) 1                                                                            | A_23_P79482  | 0.6 | 3.3E-03 |
| RHPN1        | rhophilin, Rho GTPase binding protein 1                                                           | A_23_P315386 | 0.6 | 1.9E-02 |
| NFE2L3       | nuclear factor (erythroid-derived 2)-like 3                                                       | A_24_P136653 | 0.6 | 4.5E-02 |
| TMEM35       | transmembrane protein 35                                                                          | A_23_P45324  | 0.6 | 3.8E-02 |
| BMP2K        | BMP2 inducible kinase                                                                             | A_24_P86240  | 0.6 | 2.4E-03 |
| RIPK2        | receptor-interacting serine-threonine kinase 2                                                    | A_23_P252106 | 0.6 | 2.1E-03 |
| OLFML2B      | olfactomedin-like 2B                                                                              | A_23_P137689 | 0.6 | 1.0E-02 |
| FAM83B       | family with sequence similarity 83, member B                                                      | A_24_P66780  | 0.6 | 1.4E-02 |
| ACTC1        | actin, alpha, cardiac muscle 1                                                                    | A_23_P205894 | 0.6 | 3.4E-02 |
| PDE5A        | phosphodiesterase 5A, cGMP-specific                                                               | A_23_P500844 | 0.6 | 4.1E-02 |
| OSBPL10      | oxysterol binding protein-like 10                                                                 | A_23_P147245 | 0.6 | 4.5E-06 |
| C6orf192     | chromosome 6 open reading frame 192                                                               | A_23_P134113 | 0.6 | 1.0E-03 |
| FAT1         | FAT tumor suppressor homolog 1 (Drosophila)                                                       | A_23_P69586  | 0.6 | 2.6E-04 |
| DTWD2        | DTW domain containing 2                                                                           | A_32_P373557 | 0.6 | 2.2E-02 |
| TTYH1        | tweety homolog 1 (Drosophila)                                                                     | A_23_P50815  | 0.6 | 3.5E-03 |
| LOC100132167 | hypothetical LOC100132167                                                                         | A_23_P304016 | 0.6 | 3.5E-02 |
| ARL15        | ADP-ribosylation factor-like 15                                                                   | A_24_P303199 | 0.6 | 2.6E-03 |
| OCIAD2       | OCIA domain containing 2                                                                          | A_23_P121702 | 0.6 | 8.9E-04 |
| HSP90B1      | heat shock protein 90kDa beta (Grp94), member 1                                                   | A_32_P67680  | 0.6 | 7.8E-03 |
| LOC100131756 | hypothetical LOC100131756                                                                         | A_24_P316279 | 0.6 | 1.6E-02 |
| CASP3        | caspase 3, apoptosis-related cysteine peptidase                                                   | A_23_P92410  | 0.6 | 2.9E-07 |
| CDC42        | cell division cycle 42 (GTP binding protein, 25kDa)                                               | A_23_P300056 | 0.6 | 1.0E-02 |
| CDHR5        | cadherin-related family member 5                                                                  | A_24_P352388 | 0.6 | 2.9E-03 |
| ETV6         | ets variant 6                                                                                     | A_24_P372862 | 0.6 | 4.4E-04 |
| H2AFY2       | H2A histone family, member Y2                                                                     | A_23_P12733  | 0.6 | 1.8E-05 |
| SMARCC1      | SWI/SNF related, matrix associated, actin dependent regulator of chromatin, subfamily c, member 1 | A_32_P112104 | 0.6 | 5.7E-04 |
| ANGPTL6      | angiopoietin-like 6                                                                               | A_23_P50276  | 0.6 | 1.3E-02 |
| SH3PXD2A     | SH3 and PX domains 2A                                                                             | A_23_P345220 | 0.6 | 2.4E-02 |
| PTPRCAP      | protein tyrosine phosphatase, receptor type, C-associated protein                                 | A_23_P98173  | 0.6 | 2.9E-03 |

| DOWNREGULATED in IPF vs. control |                                                                             |                  |                     |         |
|----------------------------------|-----------------------------------------------------------------------------|------------------|---------------------|---------|
| Gene symbol                      | Gene Name                                                                   | Agilent probe ID | Log <sub>2</sub> FC | q-value |
| PNMT                             | phenylethanolamine N-methyltransferase                                      | A_23_P100642     | -5.1                | 5.6E-13 |
| ARG1                             | arginase, liver                                                             | A_23_P111321     | -4.2                | 1.5E-05 |
| IL1RL1                           | interleukin 1 receptor-like 1                                               | A_23_P51126      | -4.1                | 1.2E-05 |
| ITLN2                            | intelectin 2                                                                | A_24_P53778      | -4.0                | 1.2E-06 |
| SLC6A4                           | solute carrier family 6 (neurotransmitter transporter, serotonin), member 4 | A_23_P152995     | -3.8                | 3.1E-04 |
| CA4                              | carbonic anhydrase IV                                                       | A_23_P4096       | -3.8                | 4.8E-07 |
| HIF3A                            | hypoxia inducible factor 3, alpha subunit                                   | A_23_P374339     | -3.6                | 1.5E-10 |
| BTNL9                            | butyrophilin-like 9                                                         | A_32_P187951     | -3.6                | 6.7E-09 |
| TTN                              | titin                                                                       | A_23_P85269      | -3.5                | 1.6E-08 |
| CPB2                             | carboxypeptidase B2 (plasma)                                                | A_23_P36901      | -3.5                | 6.2E-04 |
| VIPR1                            | vasoactive intestinal peptide receptor 1                                    | A_24_P105933     | -3.3                | 4.2E-05 |
| FGF12                            | fibroblast growth factor 12                                                 | A_24_P334300     | -3.2                | 1.4E-08 |
| LOC151438                        | hypothetical protein LOC151438                                              | A_24_P750164     | -3.1                | 3.2E-06 |
| ANGPTL7                          | angiopoietin-like 7                                                         | A_23_P114862     | -3.1                | 8.9E-05 |
| NECAB1                           | N-terminal EF-hand calcium binding protein 1                                | A_24_P33989      | -3.1                | 8.8E-13 |
| KLRG2                            | killer cell lectin-like receptor subfamily G, member 2                      | A_23_P8723       | -3.0                | 2.8E-09 |
| FAM105A                          | family with sequence similarity 105, member A                               | A_32_P51848      | -3.0                | 3.9E-06 |
| IL1R2                            | interleukin 1 receptor, type II                                             | A_24_P63019      | -3.0                | 3.4E-07 |
| ACADL                            | acyl-CoA dehydrogenase, long chain                                          | A_24_P234242     | -3.0                | 2.9E-06 |
| OLAH                             | oleoyl-ACP hydrolase                                                        | A_23_P161458     | -3.0                | 2.3E-11 |
| RTKN2                            | rhotekin 2                                                                  | A_24_P13041      | -3.0                | 1.3E-04 |
| TMEM100                          | transmembrane protein 100                                                   | A_23_P15450      | -3.0                | 4.0E-05 |
| PLA2G1B                          | phospholipase A2, group IB (pancreas)                                       | A_24_P224116     | -3.0                | 4.7E-05 |
| SULT1B1                          | sulfotransferase family, cytosolic, 1B, member 1                            | A_23_P121622     | -2.9                | 1.9E-05 |
| DEFA3                            | defensin, alpha 3, neutrophil-specific                                      | A_23_P31816      | -2.9                | 2.4E-04 |
| PRX                              | periaxin                                                                    | A_23_P429959     | -2.9                | 7.1E-07 |
| ZNF385B                          | zinc finger protein 385B                                                    | A_23_P334857     | -2.8                | 7.7E-05 |
| LAMA3                            | laminin, alpha 3                                                            | A_24_P179569     | -2.8                | 9.6E-08 |
| ADRA1B                           | adrenergic, alpha-1B-, receptor                                             | A_23_P33326      | -2.8                | 1.9E-08 |
| AFF2                             | AF4/FMR2 family, member 2                                                   | A_23_P217468     | -2.8                | 6.9E-07 |
| PGC                              | progastricsin (pepsinogen C)                                                | A_23_P7965       | -2.8                | 2.4E-05 |
| FMO5                             | flavin containing monooxygenase 5                                           | A_23_P233        | -2.8                | 1.1E-11 |
| SLCO4A1                          | solute carrier organic anion transporter family, member 4A1                 | A_23_P5903       | -2.8                | 6.1E-09 |
| FKBP5                            | FK506 binding protein 5                                                     | A_23_P111206     | -2.7                | 4.9E-07 |
| C13orf36                         | chromosome 13 open reading frame 36                                         | A_24_P366607     | -2.7                | 5.6E-07 |
| SOSTDC1                          | sclerostin domain containing 1                                              | A_23_P145841     | -2.7                | 1.1E-04 |
| ECEL1P2                          | endothelin converting enzyme-like 1, pseudogene 2                           | A_32_P71776      | -2.7                | 4.5E-05 |
| CYP3A4                           | cytochrome P450, family 3, subfamily A, polypeptide 4                       | A_24_P389251     | -2.7                | 1.1E-05 |

|              |                                                                                         |              |      |         |
|--------------|-----------------------------------------------------------------------------------------|--------------|------|---------|
| IL18R1       | interleukin 18 receptor 1                                                               | A_23_P39735  | -2.7 | 6.2E-06 |
| CAV3         | caveolin 3                                                                              | A_24_P319989 | -2.7 | 4.6E-06 |
| TIMP4        | TIMP metalloproteinase inhibitor 4                                                      | A_32_P70315  | -2.7 | 4.2E-10 |
| GLDN         | gliomedin                                                                               | A_24_P49199  | -2.6 | 1.0E-05 |
| CYP3A5       | cytochrome P450, family 3, subfamily A, polypeptide 5                                   | A_23_P8801   | -2.6 | 4.4E-06 |
| GALNTL4      | UDP-N-acetyl-alpha-D-galactosamine:polypeptide N-acetylgalactosaminyltransferase-like 4 | A_24_P924301 | -2.6 | 1.5E-04 |
| KIAA0408     | KIAA0408                                                                                | A_24_P112061 | -2.6 | 1.0E-07 |
| DEFA4        | defensin, alpha 4, corticostatin                                                        | A_23_P326080 | -2.6 | 7.1E-05 |
| LOC100128979 | hypothetical LOC100128979                                                               | A_24_P179244 | -2.5 | 2.9E-08 |
| CYP3A7       | cytochrome P450, family 3, subfamily A, polypeptide 7                                   | A_23_P358917 | -2.5 | 3.0E-06 |
| ZBTB16       | zinc finger and BTB domain containing 16                                                | A_23_P104804 | -2.5 | 2.6E-05 |
| ATP13A4      | ATPase type 13A4                                                                        | A_24_P205327 | -2.5 | 3.2E-05 |
| ABCC8        | ATP-binding cassette, sub-family C (CFTR/MRP), member 8                                 | A_23_P24774  | -2.5 | 2.0E-06 |
| ODAM         | odontogenic, ameloblast associated                                                      | A_23_P58228  | -2.4 | 1.7E-07 |
| OLFM4        | olfactomedin 4                                                                          | A_24_P181254 | -2.4 | 1.2E-02 |
| KLF15        | Kruppel-like factor 15                                                                  | A_24_P20327  | -2.4 | 2.9E-09 |
| SCN1A        | sodium channel, voltage-gated, type I, alpha subunit                                    | A_23_P28224  | -2.4 | 6.2E-05 |
| STXBP6       | syntaxin binding protein 6 (amisyn)                                                     | A_24_P10214  | -2.4 | 3.6E-06 |
| GPX3         | glutathione peroxidase 3 (plasma)                                                       | A_23_P133474 | -2.4 | 8.7E-09 |
| HHIP         | hedgehog interacting protein                                                            | A_24_P401842 | -2.4 | 9.5E-05 |
| LOC400550    | hypothetical LOC400550                                                                  | A_24_P459621 | -2.4 | 4.2E-04 |
| USHBP1       | Usher syndrome 1C binding protein 1                                                     | A_32_P189592 | -2.4 | 1.7E-05 |
| CCL26        | chemokine (C-C motif) ligand 26                                                         | A_24_P12573  | -2.4 | 2.1E-05 |
| P2RY1        | purinergic receptor P2Y, G-protein coupled, 1                                           | A_23_P382835 | -2.3 | 4.9E-06 |
| EDNRB        | endothelin receptor type B                                                              | A_23_P2831   | -2.3 | 1.3E-10 |
| RGS9BP       | regulator of G protein signaling 9 binding protein                                      | A_32_P227605 | -2.3 | 1.2E-06 |
| RBP2         | retinol binding protein 2, cellular                                                     | A_23_P80491  | -2.3 | 6.2E-04 |
| SCN7A        | sodium channel, voltage-gated, type VII, alpha                                          | A_23_P90944  | -2.3 | 2.3E-05 |
| ADORA3       | adenosine A3 receptor                                                                   | A_23_P137931 | -2.3 | 2.4E-04 |
| GCOM1        | GRINL1A complex locus                                                                   | A_23_P129144 | -2.3 | 4.5E-05 |
| KCNMB4       | potassium large conductance calcium-activated channel, subfamily M, beta member 4       | A_23_P64792  | -2.3 | 1.8E-09 |
| CDH19        | cadherin 19, type 2                                                                     | A_23_P38735  | -2.3 | 1.1E-05 |
| PTPRB        | protein tyrosine phosphatase, receptor type, B                                          | A_24_P661612 | -2.3 | 2.9E-05 |
| FAM167A      | family with sequence similarity 167, member A                                           | A_23_P334955 | -2.3 | 4.9E-08 |
| CLEC1B       | C-type lectin domain family 1, member B                                                 | A_23_P48212  | -2.2 | 2.2E-04 |
| LOC643441    | hypothetical LOC643441                                                                  | A_32_P9151   | -2.2 | 4.4E-04 |
| F2RL3        | coagulation factor II (thrombin) receptor-like 3                                        | A_23_P208422 | -2.2 | 6.5E-05 |
| SLC19A3      | solute carrier family 19, member 3                                                      | A_23_P39871  | -2.2 | 1.5E-05 |
| FAM107A      | family with sequence similarity 107, member A                                           | A_23_P84860  | -2.2 | 1.6E-06 |

|            |                                                                                                         |              |      |         |
|------------|---------------------------------------------------------------------------------------------------------|--------------|------|---------|
| MATN3      | matrilin 3                                                                                              | A_23_P102058 | -2.2 | 9.5E-05 |
| SVEP1      | sushi, von Willebrand factor type A, EGF and pentraxin domain containing 1                              | A_24_P187774 | -2.2 | 5.4E-05 |
| PCSK2      | proprotein convertase subtilisin/kexin type 2                                                           | A_23_P79968  | -2.2 | 3.4E-03 |
| NDRG4      | NDRG family member 4                                                                                    | A_23_P140748 | -2.2 | 1.7E-07 |
| SLC25A18   | solute carrier family 25 (mitochondrial carrier), member 18                                             | A_24_P74508  | -2.2 | 7.9E-08 |
| SLC14A1    | solute carrier family 14 (urea transporter), member 1 (Kidd blood group)                                | A_24_P926507 | -2.2 | 3.6E-04 |
| BTNL3      | butyrophilin-like 3                                                                                     | A_23_P158297 | -2.2 | 3.1E-02 |
| FCN3       | ficolin (collagen/fibrinogen domain containing) 3 (Hakata antigen)                                      | A_23_P115246 | -2.2 | 2.0E-03 |
| SGCG       | sarcoglycan, gamma (35kDa dystrophin-associated glycoprotein)                                           | A_23_P423237 | -2.1 | 5.6E-04 |
| AFF3       | AF4/FMR2 family, member 3                                                                               | A_23_P373464 | -2.1 | 2.4E-08 |
| ITGA10     | integrin, alpha 10                                                                                      | A_23_P138289 | -2.1 | 3.9E-09 |
| RXFP1      | relaxin/insulin-like family peptide receptor 1                                                          | A_23_P124534 | -2.1 | 3.6E-05 |
| KCNS1      | potassium voltage-gated channel, delayed-rectifier, subfamily S, member 1                               | A_23_P321846 | -2.1 | 2.2E-07 |
| EMP2       | epithelial membrane protein 2                                                                           | A_23_P106682 | -2.1 | 1.2E-07 |
| PTPRG      | protein tyrosine phosphatase, receptor type, G                                                          | A_32_P93493  | -2.1 | 5.4E-06 |
| PDK4       | pyruvate dehydrogenase kinase, isozyme 4                                                                | A_23_P257087 | -2.1 | 2.0E-03 |
| NKAPL      | NFKB activating protein-like                                                                            | A_23_P133854 | -2.1 | 4.5E-05 |
| KIAA1549   | KIAA1549                                                                                                | A_32_P103508 | -2.1 | 7.0E-07 |
| SLC1A1     | solute carrier family 1 (neuronal/epithelial high affinity glutamate transporter, system Xag), member 1 | A_23_P216468 | -2.1 | 9.1E-07 |
| PCSK9      | proprotein convertase subtilisin/kexin type 9                                                           | A_32_P142440 | -2.1 | 3.7E-05 |
| BTNL8      | butyrophilin-like 8                                                                                     | A_23_P7412   | -2.1 | 2.5E-03 |
| CCK        | cholecystokinin                                                                                         | A_23_P425681 | -2.0 | 1.3E-07 |
| HSD17B6    | hydroxysteroid (17-beta) dehydrogenase 6 homolog (mouse)                                                | A_23_P25030  | -2.0 | 1.5E-07 |
| LIFR       | leukemia inhibitory factor receptor alpha                                                               | A_24_P397386 | -2.0 | 1.1E-08 |
| CA2        | carbonic anhydrase II                                                                                   | A_23_P8913   | -2.0 | 8.5E-06 |
| CACNA2D3   | calcium channel, voltage-dependent, alpha 2/delta subunit 3                                             | A_24_P402825 | -2.0 | 9.3E-08 |
| GPM6B      | glycoprotein M6B                                                                                        | A_23_P378416 | -2.0 | 1.1E-08 |
| VSIG10     | V-set and immunoglobulin domain containing 10                                                           | A_24_P914000 | -2.0 | 9.7E-11 |
| SLC40A1    | solute carrier family 40 (iron-regulated transporter), member 1                                         | A_24_P920366 | -2.0 | 7.9E-05 |
| SEMA3E     | sema domain, immunoglobulin domain (Ig), short basic domain, secreted, (semaphorin) 3E                  | A_24_P123833 | -2.0 | 3.5E-04 |
| EPAS1      | endothelial PAS domain protein 1                                                                        | A_23_P210210 | -2.0 | 7.0E-08 |
| NCRNA00165 | non-protein coding RNA 165                                                                              | A_32_P60013  | -2.0 | 5.3E-08 |
| MME        | membrane metallo-endopeptidase                                                                          | A_23_P212061 | -2.0 | 2.8E-05 |
| SEC14L4    | SEC14-like 4 (S. cerevisiae)                                                                            | A_23_P421032 | -2.0 | 2.0E-05 |
| GFOD1      | glucose-fructose oxidoreductase domain containing 1                                                     | A_23_P122662 | -2.0 | 3.2E-10 |

|              |                                                                                                          |              |      |         |
|--------------|----------------------------------------------------------------------------------------------------------|--------------|------|---------|
| MOSC1        | MOCO sulphurase C-terminal domain containing 1                                                           | A_24_P233995 | -2.0 | 9.7E-14 |
| PLLIP        | plasmolipin                                                                                              | A_23_P43763  | -2.0 | 1.9E-10 |
| PRINS        | psoriasis associated RNA induced by stress (non-protein coding)                                          | A_32_P10133  | -2.0 | 4.5E-05 |
| RPL23AP32    | ribosomal protein L23a pseudogene 32                                                                     | A_23_P108932 | -2.0 | 7.8E-06 |
| TNNT2        | troponin T type 2 (cardiac)                                                                              | A_24_P927304 | -2.0 | 3.0E-05 |
| SEMA6A       | sema domain, transmembrane domain (TM), and cytoplasmic domain, (semaphorin) 6A                          | A_24_P857669 | -2.0 | 3.7E-05 |
| UGT2B4       | UDP glucuronosyltransferase 2 family, polypeptide B4                                                     | A_23_P386912 | -1.9 | 3.2E-03 |
| FLT1         | fms-related tyrosine kinase 1 (vascular endothelial growth factor/vascular permeability factor receptor) | A_24_P246125 | -1.9 | 3.4E-04 |
| LCN6         | lipocalin 6                                                                                              | A_23_P83184  | -1.9 | 1.9E-04 |
| ABCC13       | ATP-binding cassette, sub-family C (CFTR/MRP), member 13, pseudogene                                     | A_23_P397480 | -1.9 | 7.4E-06 |
| SSTR1        | somatostatin receptor 1                                                                                  | A_24_P244706 | -1.9 | 1.1E-03 |
| VEPH1        | ventricular zone expressed PH domain homolog 1 (zebrafish)                                               | A_23_P380208 | -1.9 | 3.0E-04 |
| NQO1         | NAD(P)H dehydrogenase, quinone 1                                                                         | A_23_P206661 | -1.9 | 7.4E-06 |
| GPR116       | G protein-coupled receptor 116                                                                           | A_24_P299469 | -1.9 | 3.4E-04 |
| ZBED2        | zinc finger, BED-type containing 2                                                                       | A_23_P113793 | -1.9 | 1.7E-03 |
| CHRM3        | cholinergic receptor, muscarinic 3                                                                       | A_23_P401472 | -1.9 | 6.2E-08 |
| FGFBP2       | fibroblast growth factor binding protein 2                                                               | A_24_P226069 | -1.9 | 3.0E-03 |
| RNF182       | ring finger protein 182                                                                                  | A_23_P399255 | -1.9 | 6.3E-11 |
| GPLD1        | glycosylphosphatidylinositol specific phospholipase D1                                                   | A_23_P402254 | -1.9 | 1.5E-04 |
| MAOA         | monoamine oxidase A                                                                                      | A_23_P83857  | -1.9 | 2.3E-12 |
| SLCO4C1      | solute carrier organic anion transporter family, member 4C1                                              | A_32_P154342 | -1.9 | 4.6E-04 |
| TMSB15A      | thymosin beta 15a                                                                                        | A_23_P137173 | -1.9 | 5.1E-06 |
| ANXA3        | annexin A3                                                                                               | A_23_P121716 | -1.9 | 1.6E-06 |
| ADRB1        | adrenergic, beta-1-, receptor                                                                            | A_23_P52240  | -1.9 | 9.1E-03 |
| AGTR1        | angiotensin II receptor, type 1                                                                          | A_23_P166616 | -1.9 | 6.7E-04 |
| LOC646576    | hypothetical LOC646576                                                                                   | A_32_P115050 | -1.9 | 2.1E-05 |
| TOX2         | TOX high mobility group box family member 2                                                              | A_23_P154566 | -1.9 | 1.8E-08 |
| DPCR1        | diffuse panbronchiolitis critical region 1                                                               | A_23_P122508 | -1.9 | 1.3E-02 |
| HYAL1        | hyaluronoglucosaminidase 1                                                                               | A_23_P69329  | -1.9 | 1.0E-06 |
| TMEM204      | transmembrane protein 204                                                                                | A_23_P37685  | -1.8 | 1.1E-08 |
| MPP3         | membrane protein, palmitoylated 3 (MAGUK p55 subfamily member 3)                                         | A_23_P141346 | -1.8 | 2.6E-07 |
| RNASE2       | ribonuclease, RNase A family, 2 (liver, eosinophil-derived neurotoxin)                                   | A_23_P151637 | -1.8 | 1.8E-03 |
| ARHGEF26     | Rho guanine nucleotide exchange factor (GEF) 26                                                          | A_23_P69100  | -1.8 | 3.7E-06 |
| CORO6        | coronin 6                                                                                                | A_23_P107322 | -1.8 | 4.7E-12 |
| LOC254057    | hypothetical protein LOC254057                                                                           | A_24_P450092 | -1.8 | 6.2E-06 |
| LOC100131170 | hypothetical LOC100131170                                                                                | A_24_P8151   | -1.8 | 6.7E-05 |

|              |                                                                                                               |              |      |         |
|--------------|---------------------------------------------------------------------------------------------------------------|--------------|------|---------|
| TBX3         | T-box 3                                                                                                       | A_23_P383819 | -1.8 | 1.4E-05 |
| C11orf61     | chromosome 11 open reading frame 61                                                                           | A_32_P88177  | -1.8 | 6.2E-05 |
| EPB41L5      | erythrocyte membrane protein band 4.1 like 5                                                                  | A_23_P209298 | -1.8 | 7.7E-08 |
| MAP2         | microtubule-associated protein 2                                                                              | A_24_P231483 | -1.8 | 3.1E-06 |
| PRTG         | protogenin                                                                                                    | A_32_P65391  | -1.8 | 6.1E-08 |
| SYNE1        | spectrin repeat containing, nuclear envelope 1                                                                | A_23_P42451  | -1.8 | 2.4E-03 |
| CA3          | carbonic anhydrase III, muscle specific                                                                       | A_23_P20316  | -1.8 | 1.1E-02 |
| HRCT1        | histidine rich carboxyl terminus 1                                                                            | A_23_P94434  | -1.8 | 3.8E-03 |
| RS1          | retinoschisin 1                                                                                               | A_23_P148292 | -1.8 | 1.3E-07 |
| HTR3C        | 5-hydroxytryptamine (serotonin) receptor 3, family member C                                                   | A_23_P124402 | -1.8 | 2.1E-03 |
| PIP5K1B      | phosphatidylinositol-4-phosphate 5-kinase, type I, beta                                                       | A_32_P465742 | -1.8 | 4.1E-08 |
| PLA2G4F      | phospholipase A2, group IVF                                                                                   | A_24_P147169 | -1.8 | 9.2E-07 |
| TACC2        | transforming, acidic coiled-coil containing protein 2                                                         | A_23_P127186 | -1.8 | 2.2E-09 |
| TBX5         | T-box 5                                                                                                       | A_23_P25176  | -1.8 | 2.6E-03 |
| SYT15        | synaptotagmin XV                                                                                              | A_32_P67904  | -1.7 | 7.4E-08 |
| HOGA1        | 4-hydroxy-2-oxoglutarate aldolase 1                                                                           | A_23_P364613 | -1.7 | 4.7E-06 |
| PCDH11Y      | protocadherin 11 Y-linked                                                                                     | A_32_P137980 | -1.7 | 6.4E-06 |
| IP6K3        | inositol hexakisphosphate kinase 3                                                                            | A_23_P168130 | -1.7 | 2.3E-11 |
| ZC3H7B       | zinc finger CCCH-type containing 7B                                                                           | A_24_P797678 | -1.7 | 1.1E-04 |
| NPR1         | natriuretic peptide receptor A/guanylate cyclase A (atriuretic peptide receptor A)                            | A_23_P147711 | -1.7 | 7.6E-09 |
| SLCO2A1      | solute carrier organic anion transporter family, member 2A1                                                   | A_23_P135990 | -1.7 | 2.6E-06 |
| FGR          | Gardner-Rasheed feline sarcoma viral (v-fgr) oncogene homolog                                                 | A_24_P316634 | -1.7 | 5.4E-03 |
| CRTAC1       | cartilage acidic protein 1                                                                                    | A_23_P431971 | -1.7 | 3.4E-06 |
| CLDN18       | claudin 18                                                                                                    | A_23_P336693 | -1.7 | 1.8E-02 |
| CTNND2       | catenin (cadherin-associated protein), delta 2 (neural plakophilin-related arm-repeat protein)                | A_24_P380196 | -1.7 | 8.5E-06 |
| ST6GALNAC3   | ST6 (alpha-N-acetyl-neuraminyl-2,3-beta-galactosyl-1,3)-N-acetylgalactosaminide alpha-2,6-sialyltransferase 3 | A_23_P416711 | -1.7 | 2.0E-12 |
| LAMC3        | laminin, gamma 3                                                                                              | A_23_P82979  | -1.7 | 6.2E-05 |
| ALOX15B      | arachidonate 15-lipoxygenase, type B                                                                          | A_23_P60627  | -1.7 | 1.4E-03 |
| TIMP3        | TIMP metalloproteinase inhibitor 3                                                                            | A_23_P399078 | -1.7 | 4.0E-07 |
| LOC100507524 | hypothetical LOC100507524                                                                                     | A_24_P740549 | -1.7 | 3.6E-03 |
| DUOX1        | dual oxidase 1                                                                                                | A_24_P316586 | -1.7 | 1.5E-03 |
| HYAL2        | hyaluronoglucosaminidase 2                                                                                    | A_23_P57927  | -1.7 | 1.7E-08 |
| WFDC5        | WAP four-disulfide core domain 5                                                                              | A_23_P218669 | -1.7 | 6.5E-08 |
| FASN         | fatty acid synthase                                                                                           | A_23_P44132  | -1.7 | 3.0E-09 |
| PTH1R        | parathyroid hormone 1 receptor                                                                                | A_23_P167030 | -1.7 | 4.0E-07 |
| C9orf5       | chromosome 9 open reading frame 5                                                                             | A_32_P10116  | -1.7 | 1.9E-05 |
| MT1M         | metallothionein 1M                                                                                            | A_23_P66241  | -1.7 | 5.8E-04 |



|              |                                                                                  |              |      |         |
|--------------|----------------------------------------------------------------------------------|--------------|------|---------|
| GPER         | G protein-coupled estrogen receptor 1                                            | A_23_P8640   | -1.7 | 4.5E-06 |
| LRRN3        | leucine rich repeat neuronal 3                                                   | A_24_P187766 | -1.7 | 1.4E-04 |
| SDR16C5      | short chain dehydrogenase/reductase family 16C, member 5                         | A_24_P317708 | -1.7 | 8.9E-04 |
| GPIHBP1      | glycosylphosphatidylinositol anchored high density lipoprotein binding protein 1 | A_23_P72697  | -1.7 | 9.7E-06 |
| FIGF         | c-fos induced growth factor (vascular endothelial growth factor D)               | A_23_P45185  | -1.7 | 1.3E-03 |
| NCKAP5       | NCK-associated protein 5                                                         | A_24_P298224 | -1.7 | 9.1E-04 |
| S100A12      | S100 calcium binding protein A12                                                 | A_23_P74001  | -1.6 | 1.1E-03 |
| MFSD2A       | major facilitator superfamily domain containing 2A                               | A_23_P253783 | -1.6 | 3.9E-07 |
| ALDH1L1      | aldehyde dehydrogenase 1 family, member L1                                       | A_23_P258887 | -1.6 | 2.9E-05 |
| SYTL5        | synaptotagmin-like 5                                                             | A_24_P14776  | -1.6 | 9.1E-03 |
| SPOCK1       | sparc/osteonectin, cwcv and kazal-like domains proteoglycan (testican) 1         | A_24_P354689 | -1.6 | 3.9E-05 |
| CCDC68       | coiled-coil domain containing 68                                                 | A_23_P363255 | -1.6 | 1.3E-02 |
| HECW2        | HECT, C2 and WW domain containing E3 ubiquitin protein ligase 2                  | A_23_P50967  | -1.6 | 1.1E-02 |
| TPO          | thyroid peroxidase                                                               | A_24_P257224 | -1.6 | 7.9E-04 |
| GIMAP1       | GTPase, IMAP family member 1                                                     | A_23_P31188  | -1.6 | 3.9E-05 |
| QKI          | quaking homolog, KH domain RNA binding (mouse)                                   | A_24_P456452 | -1.6 | 1.5E-04 |
| TRIM58       | tripartite motif containing 58                                                   | A_23_P314052 | -1.6 | 1.7E-04 |
| CACNA2D2     | calcium channel, voltage-dependent, alpha 2/delta subunit 2                      | A_23_P346900 | -1.6 | 2.0E-04 |
| LEPREL1      | leprecan-like 1                                                                  | A_23_P69179  | -1.6 | 2.1E-05 |
| CSNK2A1      | casein kinase 2, alpha 1 polypeptide                                             | A_24_P76666  | -1.6 | 5.8E-08 |
| CDO1         | cysteine dioxygenase, type I                                                     | A_23_P30294  | -1.6 | 6.9E-05 |
| TAL1         | T-cell acute lymphocytic leukemia 1                                              | A_23_P63371  | -1.6 | 6.1E-05 |
| SMAD6        | SMAD family member 6                                                             | A_23_P65812  | -1.6 | 1.1E-04 |
| INMT         | indolethylamine N-methyltransferase                                              | A_23_P70961  | -1.6 | 7.3E-04 |
| CACNB4       | calcium channel, voltage-dependent, beta 4 subunit                               | A_23_P209227 | -1.6 | 1.1E-04 |
| PRR15L       | proline rich 15-like                                                             | A_23_P118894 | -1.6 | 1.3E-03 |
| LOC645277    | hypothetical LOC645277                                                           | A_32_P49867  | -1.6 | 9.7E-06 |
| LOC100507308 | hypothetical LOC100507308                                                        | A_24_P706236 | -1.6 | 2.1E-02 |
| PLAG1        | pleiomorphic adenoma gene 1                                                      | A_23_P411723 | -1.6 | 1.4E-07 |
| SLCO1A2      | solute carrier organic anion transporter family, member 1A2                      | A_23_P13820  | -1.6 | 3.1E-04 |
| ADAMTSL3     | ADAMTS-like 3                                                                    | A_24_P400842 | -1.6 | 4.3E-03 |
| FZD5         | frizzled homolog 5 (Drosophila)                                                  | A_32_P207789 | -1.6 | 6.3E-08 |
| HOPX         | HOP homeobox                                                                     | A_32_P135168 | -1.6 | 6.1E-04 |
| TNNC1        | troponin C type 1 (slow)                                                         | A_23_P166823 | -1.6 | 4.5E-04 |
| WNT3A        | wingless-type MMTV integration site family, member 3A                            | A_23_P385690 | -1.6 | 2.3E-04 |
| C11orf9      | chromosome 11 open reading frame 9                                               | A_23_P75790  | -1.6 | 5.0E-07 |
| ZNF366       | zinc finger protein 366                                                          | A_23_P407096 | -1.6 | 4.2E-03 |
| TDRD9        | tudor domain containing 9                                                        | A_32_P208350 | -1.6 | 7.1E-06 |

|           |                                                                             |              |      |         |
|-----------|-----------------------------------------------------------------------------|--------------|------|---------|
| ANGPTL1   | angiotensin-like 1                                                          | A_24_P199484 | -1.6 | 6.8E-03 |
| MT1JP     | metallothionein 1J (pseudogene)                                             | A_24_P74828  | -1.6 | 1.4E-03 |
| SDPR      | serum deprivation response                                                  | A_23_P72668  | -1.6 | 4.9E-06 |
| SLC16A12  | solute carrier family 16, member 12<br>(monocarboxylic acid transporter 12) | A_24_P13024  | -1.6 | 7.5E-03 |
| TRPC3     | transient receptor potential cation channel,<br>subfamily C, member 3       | A_23_P41455  | -1.6 | 1.5E-06 |
| DAPK2     | death-associated protein kinase 2                                           | A_24_P10233  | -1.5 | 1.2E-05 |
| NEBL      | nebulin                                                                     | A_24_P398147 | -1.5 | 2.3E-07 |
| ABCA3     | ATP-binding cassette, sub-family A (ABC1), member<br>3                      | A_23_P140876 | -1.5 | 1.6E-03 |
| FLT3      | fms-related tyrosine kinase 3                                               | A_23_P99442  | -1.5 | 3.9E-03 |
| LAMP3     | lysosomal-associated membrane protein 3                                     | A_23_P29773  | -1.5 | 1.9E-03 |
| RNASE3    | ribonuclease, RNase A family, 3                                             | A_23_P163025 | -1.5 | 1.6E-03 |
| IZUMO1    | izumo sperm-egg fusion 1                                                    | A_24_P340247 | -1.5 | 4.8E-04 |
| SLC39A8   | solute carrier family 39 (zinc transporter), member<br>8                    | A_23_P41424  | -1.5 | 2.3E-04 |
| DBC1      | deleted in bladder cancer 1                                                 | A_23_P94517  | -1.5 | 5.1E-03 |
| MACROD2   | MACRO domain containing 2                                                   | A_23_P22398  | -1.5 | 3.2E-03 |
| PLA1A     | phospholipase A1 member A                                                   | A_23_P29816  | -1.5 | 1.7E-04 |
| KCNK3     | potassium channel, subfamily K, member 3                                    | A_23_P91104  | -1.5 | 2.6E-05 |
| ETV5      | ets variant 5                                                               | A_23_P9836   | -1.5 | 3.0E-06 |
| OSTBETA   | organic solute transporter beta                                             | A_23_P436284 | -1.5 | 2.5E-04 |
| KCNB1     | potassium voltage-gated channel, Shab-related<br>subfamily, member 1        | A_24_P31627  | -1.5 | 6.0E-03 |
| MST1P9    | macrophage stimulating 1 (hepatocyte growth<br>factor-like) pseudogene 9    | A_23_P340376 | -1.5 | 4.0E-03 |
| IL22RA1   | interleukin 22 receptor, alpha 1                                            | A_23_P62607  | -1.5 | 8.6E-03 |
| ECHDC3    | enoyl CoA hydratase domain containing 3                                     | A_23_P127033 | -1.5 | 5.7E-08 |
| RANBP3L   | RAN binding protein 3-like                                                  | A_23_P144929 | -1.5 | 6.7E-03 |
| ESYT3     | extended synaptotagmin-like protein 3                                       | A_24_P697685 | -1.5 | 6.6E-04 |
| LOC375010 | ankyrin repeat domain 20 family, member A<br>pseudogene                     | A_32_P79190  | -1.5 | 3.6E-04 |
| GATA2     | GATA binding protein 2                                                      | A_24_P165998 | -1.5 | 1.3E-05 |
| PHEX      | phosphate regulating endopeptidase homolog, X-<br>linked                    | A_23_P114084 | -1.5 | 1.4E-04 |
| WWC2      | WW and C2 domain containing 2                                               | A_24_P137545 | -1.5 | 2.3E-05 |
| MGC42105  | serine/threonine-protein kinase NIM1                                        | A_23_P254863 | -1.5 | 9.0E-06 |
| AATK      | apoptosis-associated tyrosine kinase                                        | A_23_P10559  | -1.5 | 4.5E-05 |
| SCEL      | sciellin                                                                    | A_23_P500000 | -1.5 | 1.1E-02 |
| NPTX1     | neuronal pentraxin I                                                        | A_23_P124905 | -1.5 | 4.7E-04 |
| TMEM38A   | transmembrane protein 38A                                                   | A_23_P101392 | -1.5 | 1.9E-08 |
| GPM6A     | glycoprotein M6A                                                            | A_23_P121545 | -1.5 | 2.3E-04 |
| DSEL      | dermatan sulfate epimerase-like                                             | A_24_P365180 | -1.5 | 3.7E-05 |
| ARHGAP29  | Rho GTPase activating protein 29                                            | A_32_P187320 | -1.5 | 5.5E-04 |
| CEACAM4   | carcinoembryonic antigen-related cell adhesion                              | A_24_P70480  | -1.5 | 5.6E-06 |

|          |                                                                                |              |      |         |
|----------|--------------------------------------------------------------------------------|--------------|------|---------|
|          | molecule 4                                                                     |              |      |         |
| FAM153C  | family with sequence similarity 153, member C                                  | A_32_P84373  | -1.5 | 2.9E-03 |
| VIP      | vasoactive intestinal peptide                                                  | A_23_P19650  | -1.5 | 8.6E-04 |
| TEK      | TEK tyrosine kinase, endothelial                                               | A_23_P374695 | -1.5 | 1.2E-05 |
| MGAM     | maltase-glucoamylase (alpha-glucosidase)                                       | A_23_P42897  | -1.5 | 7.6E-03 |
| TFCP2L1  | transcription factor CP2-like 1                                                | A_23_P5301   | -1.5 | 2.7E-04 |
| LGI3     | leucine-rich repeat LGI family, member 3                                       | A_23_P21086  | -1.5 | 3.7E-06 |
| FABP4    | fatty acid binding protein 4, adipocyte                                        | A_23_P8820   | -1.5 | 4.3E-02 |
| PAPSS2   | 3'-phosphoadenosine 5'-phosphosulfate synthase 2                               | A_23_P104493 | -1.5 | 1.4E-04 |
| CCBE1    | collagen and calcium binding EGF domains 1                                     | A_23_P55544  | -1.5 | 1.4E-04 |
| ADIPOR2  | adiponectin receptor 2                                                         | A_23_P48121  | -1.5 | 2.4E-11 |
| LPHN2    | latrophilin 2                                                                  | A_23_P74042  | -1.5 | 3.9E-08 |
| GTF3C3   | general transcription factor IIIc, polypeptide 3, 102kDa                       | A_24_P50818  | -1.5 | 6.5E-07 |
| CDH13    | cadherin 13, H-cadherin (heart)                                                | A_32_P85999  | -1.4 | 1.6E-05 |
| C5orf38  | chromosome 5 open reading frame 38                                             | A_23_P331235 | -1.4 | 4.5E-09 |
| PDZD2    | PDZ domain containing 2                                                        | A_23_P7402   | -1.4 | 1.0E-06 |
| LSS      | lanosterol synthase (2,3-oxidosqualene-lanosterol cyclase)                     | A_24_P162211 | -1.4 | 1.8E-08 |
| FAM153B  | family with sequence similarity 153, member B                                  | A_32_P84369  | -1.4 | 2.2E-03 |
| GSTM5    | glutathione S-transferase mu 5                                                 | A_24_P212021 | -1.4 | 1.0E-03 |
| C8orf46  | chromosome 8 open reading frame 46                                             | A_23_P353614 | -1.4 | 1.4E-04 |
| TSPAN7   | tetraspanin 7                                                                  | A_23_P114185 | -1.4 | 3.5E-06 |
| HPCA     | hippocalcin                                                                    | A_23_P126159 | -1.4 | 1.7E-07 |
| ACE2     | angiotensin I converting enzyme (peptidyl-dipeptidase A) 2                     | A_23_P252981 | -1.4 | 1.2E-05 |
| ADARB2   | adenosine deaminase, RNA-specific, B2                                          | A_23_P86751  | -1.4 | 1.7E-04 |
| FAM13AOS | FAM13A opposite strand (non-protein coding)                                    | A_24_P614362 | -1.4 | 2.1E-05 |
| CLIC5    | chloride intracellular channel 5                                               | A_23_P311895 | -1.4 | 3.3E-02 |
| FUT1     | fucosyltransferase 1 (galactoside 2-alpha-L-fucosyltransferase, H blood group) | A_23_P107963 | -1.4 | 7.5E-06 |
| GPR98    | G protein-coupled receptor 98                                                  | A_24_P119702 | -1.4 | 1.9E-04 |
| CNTN6    | contactin 6                                                                    | A_23_P155404 | -1.4 | 1.5E-02 |
| SH2D3C   | SH2 domain containing 3C                                                       | A_23_P71928  | -1.4 | 2.1E-05 |
| LPL      | lipoprotein lipase                                                             | A_23_P146233 | -1.4 | 1.3E-03 |
| HPGD     | hydroxyprostaglandin dehydrogenase 15-(NAD)                                    | A_24_P71904  | -1.4 | 3.7E-02 |
| HEY1     | hairy/enhancer-of-split related with YRPW motif 1                              | A_32_P83845  | -1.4 | 8.9E-06 |
| ALPP     | alkaline phosphatase, placental                                                | A_23_P79587  | -1.4 | 2.6E-10 |
| SLFNL1   | schlafen-like 1                                                                | A_23_P389141 | -1.4 | 1.4E-03 |
| CCNB3    | cyclin B3                                                                      | A_23_P171107 | -1.4 | 4.7E-05 |
| PIR      | pirin (iron-binding nuclear protein)                                           | A_23_P137035 | -1.4 | 5.2E-09 |
| APOH     | apolipoprotein H (beta-2-glycoprotein I)                                       | A_23_P38244  | -1.4 | 1.1E-02 |
| C5orf4   | chromosome 5 open reading frame 4                                              | A_23_P501831 | -1.4 | 7.2E-06 |

|           |                                                                                         |              |      |         |
|-----------|-----------------------------------------------------------------------------------------|--------------|------|---------|
| UNC13B    | unc-13 homolog B ( <i>C. elegans</i> )                                                  | A_23_P253395 | -1.4 | 3.5E-08 |
| HPCAL1    | hippocalcin-like 1                                                                      | A_23_P5831   | -1.4 | 3.0E-09 |
| MCCC1     | methylcrotonoyl-CoA carboxylase 1 (alpha)                                               | A_23_P58036  | -1.4 | 1.4E-11 |
| ZNF765    | zinc finger protein 765                                                                 | A_24_P202637 | -1.4 | 4.8E-04 |
| SPTBN1    | spectrin, beta, non-erythrocytic 1                                                      | A_23_P339095 | -1.4 | 6.9E-08 |
| SLED1     | proteoglycan 3 pseudogene                                                               | A_24_P927716 | -1.4 | 1.2E-02 |
| THSD7A    | thrombospondin, type I, domain containing 7A                                            | A_32_P350897 | -1.4 | 1.2E-02 |
| FZD4      | frizzled homolog 4 ( <i>Drosophila</i> )                                                | A_23_P64617  | -1.4 | 1.1E-05 |
| DISP1     | dispatched homolog 1 ( <i>Drosophila</i> )                                              | A_23_P201319 | -1.4 | 4.5E-05 |
| CLDN5     | claudin 5                                                                               | A_24_P79300  | -1.4 | 7.1E-06 |
| PHACTR3   | phosphatase and actin regulator 3                                                       | A_23_P28834  | -1.4 | 3.4E-03 |
| PKHD1L1   | polycystic kidney and hepatic disease 1 (autosomal recessive)-like 1                    | A_23_P392486 | -1.4 | 3.4E-02 |
| CTNNBIP1  | catenin, beta interacting protein 1                                                     | A_23_P23584  | -1.3 | 6.8E-11 |
| BAIAP2    | BAI1-associated protein 2                                                               | A_23_P315836 | -1.3 | 2.5E-06 |
| NEDD4L    | neural precursor cell expressed, developmentally down-regulated 4-like                  | A_24_P108311 | -1.3 | 4.9E-06 |
| AKR1C3    | aldo-keto reductase family 1, member C3 (3-alpha hydroxysteroid dehydrogenase, type II) | A_23_P138541 | -1.3 | 3.4E-06 |
| PFKFB2    | 6-phosphofructo-2-kinase/fructose-2,6-biphosphatase 2                                   | A_24_P413669 | -1.3 | 2.9E-04 |
| EFR3B     | EFR3 homolog B ( <i>S. cerevisiae</i> )                                                 | A_32_P83049  | -1.3 | 1.7E-05 |
| DCXR      | dicarbonyl/L-xylulose reductase                                                         | A_23_P44166  | -1.3 | 5.5E-14 |
| GIMAP8    | GTPase, IMAP family member 8                                                            | A_24_P132383 | -1.3 | 1.1E-04 |
| SHROOM4   | shroom family member 4                                                                  | A_24_P265064 | -1.3 | 1.2E-02 |
| SH3GL2    | SH3-domain GRB2-like 2                                                                  | A_23_P169351 | -1.3 | 1.6E-03 |
| MYLIP     | myosin regulatory light chain interacting protein                                       | A_24_P917123 | -1.3 | 3.1E-07 |
| CD177     | CD177 molecule                                                                          | A_32_P143589 | -1.3 | 2.9E-03 |
| TGFBR3    | transforming growth factor, beta receptor III                                           | A_23_P200780 | -1.3 | 1.3E-06 |
| TMTC1     | transmembrane and tetratricopeptide repeat containing 1                                 | A_23_P371495 | -1.3 | 2.3E-03 |
| ADPRH     | ADP-ribosylarginine hydrolase                                                           | A_23_P408070 | -1.3 | 2.8E-03 |
| ANKRD20A2 | ankyrin repeat domain 20 family, member A2                                              | A_24_P64241  | -1.3 | 1.2E-02 |
| ZNF114    | zinc finger protein 114                                                                 | A_23_P368779 | -1.3 | 1.9E-04 |
| SH3BP5    | SH3-domain binding protein 5 (BTK-associated)                                           | A_24_P148750 | -1.3 | 9.4E-07 |
| ARRB1     | arrestin, beta 1                                                                        | A_24_P386622 | -1.3 | 6.9E-07 |
| FXYD4     | FXYD domain containing ion transport regulator 4                                        | A_23_P98121  | -1.3 | 1.9E-04 |
| SULT1A1   | sulfotransferase family, cytosolic, 1A, phenol-preferring, member 1                     | A_23_P434212 | -1.3 | 2.0E-07 |
| AUTS2     | autism susceptibility candidate 2                                                       | A_32_P809435 | -1.3 | 1.9E-04 |
| NDRG2     | NDRG family member 2                                                                    | A_24_P244800 | -1.3 | 1.3E-04 |
| SETD5     | SET domain containing 5                                                                 | A_23_P212204 | -1.3 | 5.4E-05 |
| RADIL     | Ras association and DIL domains                                                         | A_23_P111860 | -1.3 | 2.6E-06 |
| GDF10     | growth differentiation factor 10                                                        | A_24_P355464 | -1.3 | 3.6E-02 |
| RIMKLA    | ribosomal modification protein rimK-like family                                         | A_23_P349406 | -1.3 | 6.2E-05 |

|           |                                                                                          |              |      |         |
|-----------|------------------------------------------------------------------------------------------|--------------|------|---------|
|           | member A                                                                                 |              |      |         |
| PPARGC1B  | peroxisome proliferator-activated receptor gamma, coactivator 1 beta                     | A_23_P213959 | -1.3 | 2.2E-05 |
| BEX1      | brain expressed, X-linked 1                                                              | A_23_P159952 | -1.3 | 4.6E-04 |
| LIMCH1    | LIM and calponin homology domains 1                                                      | A_32_P117354 | -1.3 | 2.2E-06 |
| SLC2A12   | solute carrier family 2 (facilitated glucose transporter), member 12                     | A_23_P395001 | -1.3 | 1.9E-04 |
| B3GALNT1  | beta-1,3-N-acetylgalactosaminyltransferase 1 (globoside blood group)                     | A_24_P88870  | -1.3 | 2.2E-07 |
| SCD       | stearoyl-CoA desaturase (delta-9-desaturase)                                             | A_32_P163858 | -1.3 | 2.6E-03 |
| ABCA9     | ATP-binding cassette, sub-family A (ABC1), member 9                                      | A_24_P241672 | -1.3 | 1.3E-02 |
| LRRK2     | leucine-rich repeat kinase 2                                                             | A_23_P128447 | -1.3 | 8.0E-03 |
| GRAMD2    | GRAM domain containing 2                                                                 | A_23_P305977 | -1.3 | 7.4E-03 |
| NUDT16    | nudix (nucleoside diphosphate linked moiety X)-type motif 16                             | A_23_P310560 | -1.3 | 1.4E-12 |
| DIO3      | deiodinase, iodothyronine, type III                                                      | A_23_P105923 | -1.3 | 1.3E-03 |
| METTL7A   | methyltransferase like 7A                                                                | A_23_P415021 | -1.3 | 6.0E-08 |
| MGST1     | microsomal glutathione S-transferase 1                                                   | A_32_P146815 | -1.3 | 5.3E-05 |
| C20orf202 | chromosome 20 open reading frame 202                                                     | A_32_P213881 | -1.3 | 3.7E-02 |
| SULT1A2   | sulfotransferase family, cytosolic, 1A, phenol-preferring, member 2                      | A_23_P106773 | -1.3 | 3.1E-07 |
| ARRDC2    | arrestin domain containing 2                                                             | A_24_P22976  | -1.3 | 3.6E-06 |
| TCAP      | titin-cap (telethonin)                                                                   | A_23_P107051 | -1.3 | 1.8E-06 |
| RPS6KA2   | ribosomal protein S6 kinase, 90kDa, polypeptide 2                                        | A_23_P335920 | -1.3 | 2.4E-09 |
| NPR3      | natriuretic peptide receptor C/guanylate cyclase C (atrionatriuretic peptide receptor C) | A_23_P327451 | -1.3 | 6.8E-03 |
| DOCK9     | dedicator of cytokinesis 9                                                               | A_23_P162766 | -1.3 | 2.3E-09 |
| SYNPO2L   | synaptopodin 2-like                                                                      | A_23_P355517 | -1.3 | 3.5E-02 |
| COL4A3    | collagen, type IV, alpha 3 (Goodpasture antigen)                                         | A_23_P170679 | -1.3 | 2.5E-02 |
| CLEC1A    | C-type lectin domain family 1, member A                                                  | A_24_P360993 | -1.3 | 2.9E-02 |
| EPG5      | ectopic P-granules autophagy protein 5 homolog (C. elegans)                              | A_24_P341923 | -1.3 | 1.3E-04 |
| PTPRS     | protein tyrosine phosphatase, receptor type, S                                           | A_24_P290856 | -1.3 | 2.9E-05 |
| GRIA1     | glutamate receptor, ionotropic, AMPA 1                                                   | A_23_P303072 | -1.3 | 1.2E-03 |
| PLA2G12B  | phospholipase A2, group XIIB                                                             | A_23_P388150 | -1.3 | 1.5E-03 |
| FIBIN     | fin bud initiation factor homolog (zebrafish)                                            | A_23_P138885 | -1.3 | 1.4E-08 |
| ADHFE1    | alcohol dehydrogenase, iron containing, 1                                                | A_23_P157569 | -1.3 | 3.8E-06 |
| PITPNM2   | phosphatidylinositol transfer protein, membrane-associated 2                             | A_23_P401361 | -1.3 | 9.2E-05 |
| CAV1      | caveolin 1, caveolae protein, 22kDa                                                      | A_23_P134454 | -1.2 | 2.1E-06 |
| CPM       | carboxypeptidase M                                                                       | A_23_P162668 | -1.2 | 4.2E-04 |
| NBLA00301 | Nbla00301                                                                                | A_23_P133000 | -1.2 | 8.8E-04 |
| ADCY5     | adenylate cyclase 5                                                                      | A_24_P919249 | -1.2 | 2.5E-02 |
| TMEM139   | transmembrane protein 139                                                                | A_23_P42909  | -1.2 | 2.4E-04 |
| RAMP3     | receptor (G protein-coupled) activity modifying protein 3                                | A_23_P111737 | -1.2 | 9.5E-04 |

|              |                                                                               |              |      |         |
|--------------|-------------------------------------------------------------------------------|--------------|------|---------|
| PCDHAC2      | protocadherin alpha subfamily C, 2                                            | A_23_P218942 | -1.2 | 4.7E-04 |
| SLIT2        | slit homolog 2 (Drosophila)                                                   | A_32_P106615 | -1.2 | 1.2E-04 |
| PLEKHM3      | pleckstrin homology domain containing, family M, member 3                     | A_24_P281243 | -1.2 | 5.8E-05 |
| WFIKKN1      | WAP, follistatin/kazal, immunoglobulin, kunitz and netrin domain containing 1 | A_23_P163666 | -1.2 | 2.6E-05 |
| OLFML2A      | olfactomedin-like 2A                                                          | A_24_P220485 | -1.2 | 1.1E-05 |
| PCOLCE2      | procollagen C-endopeptidase enhancer 2                                        | A_23_P57709  | -1.2 | 1.6E-02 |
| CBS          | cystathionine-beta-synthase                                                   | A_24_P48856  | -1.2 | 2.1E-11 |
| EFNB1        | ephrin-B1                                                                     | A_24_P365807 | -1.2 | 2.2E-07 |
| KIAA0894     | KIAA0894 protein                                                              | A_23_P428080 | -1.2 | 2.5E-02 |
| FOXF1        | forkhead box F1                                                               | A_23_P118254 | -1.2 | 1.7E-03 |
| GRASP        | GRP1 (general receptor for phosphoinositides 1)-associated scaffold protein   | A_23_P105442 | -1.2 | 2.0E-04 |
| CD36         | CD36 molecule (thrombospondin receptor)                                       | A_24_P925505 | -1.2 | 2.6E-03 |
| SNX25        | sorting nexin 25                                                              | A_24_P303097 | -1.2 | 3.5E-04 |
| GGT1         | gamma-glutamyltransferase 1                                                   | A_23_P154986 | -1.2 | 7.7E-06 |
| PRR16        | proline rich 16                                                               | A_23_P92929  | -1.2 | 6.8E-05 |
| CHRM2        | cholinergic receptor, muscarinic 2                                            | A_23_P145606 | -1.2 | 5.4E-08 |
| KDR          | kinase insert domain receptor (a type III receptor tyrosine kinase)           | A_23_P58419  | -1.2 | 1.3E-02 |
| NLRP12       | NLR family, pyrin domain containing 12                                        | A_23_P101434 | -1.2 | 2.2E-03 |
| FHDC1        | FH2 domain containing 1                                                       | A_23_P328259 | -1.2 | 4.8E-03 |
| MYOT         | myotilin                                                                      | A_23_P110764 | -1.2 | 8.9E-03 |
| SELENBP1     | selenium binding protein 1                                                    | A_23_P74619  | -1.2 | 7.1E-06 |
| KHDRBS2      | KH domain containing, RNA binding, signal transduction associated 2           | A_23_P366453 | -1.2 | 1.3E-02 |
| LOC644662    | hypothetical protein LOC644662                                                | A_32_P191840 | -1.2 | 3.2E-03 |
| PRKAG2       | protein kinase, AMP-activated, gamma 2 non-catalytic subunit                  | A_24_P384779 | -1.2 | 6.1E-04 |
| KCNK17       | potassium channel, subfamily K, member 17                                     | A_23_P42128  | -1.2 | 1.9E-02 |
| KLRF1        | killer cell lectin-like receptor subfamily F, member 1                        | A_32_P158966 | -1.2 | 3.0E-02 |
| SCNN1A       | sodium channel, nonvoltage-gated 1 alpha                                      | A_23_P128323 | -1.2 | 1.1E-06 |
| GGTLC2       | gamma-glutamyltransferase light chain 2                                       | A_32_P319200 | -1.2 | 1.2E-05 |
| NOTCH4       | notch 4                                                                       | A_23_P365614 | -1.2 | 4.9E-06 |
| LOC100506795 | hypothetical LOC100506795                                                     | A_32_P2844   | -1.2 | 2.3E-02 |
| LDHD         | lactate dehydrogenase D                                                       | A_23_P54918  | -1.2 | 1.5E-07 |
| PLIN5        | perilipin 5                                                                   | A_23_P39251  | -1.2 | 1.5E-05 |
| STARD8       | StAR-related lipid transfer (START) domain containing 8                       | A_23_P387630 | -1.2 | 1.4E-07 |
| NID1         | nidogen 1                                                                     | A_23_P200928 | -1.2 | 8.5E-05 |
| HPN          | hepsin                                                                        | A_23_P406782 | -1.2 | 1.2E-02 |
| RAB17        | RAB17, member RAS oncogene family                                             | A_23_P5778   | -1.2 | 1.5E-05 |
| CHPT1        | choline phosphotransferase 1                                                  | A_23_P105571 | -1.2 | 4.6E-09 |
| C1orf115     | chromosome 1 open reading frame 115                                           | A_23_P160433 | -1.2 | 1.6E-08 |

|              |                                                                                                                                             |              |      |         |
|--------------|---------------------------------------------------------------------------------------------------------------------------------------------|--------------|------|---------|
| TMEM97       | transmembrane protein 97                                                                                                                    | A_32_P201521 | -1.2 | 8.2E-08 |
| KIAA0319     | KIAA0319                                                                                                                                    | A_24_P166397 | -1.2 | 4.9E-02 |
| PMM1         | phosphomannomutase 1                                                                                                                        | A_23_P211598 | -1.2 | 3.7E-10 |
| FAM19A4      | family with sequence similarity 19 (chemokine (C-C motif)-like), member A4                                                                  | A_32_P71571  | -1.2 | 2.5E-02 |
| FKBP1B       | FK506 binding protein 1B, 12.6 kDa                                                                                                          | A_23_P142631 | -1.2 | 1.3E-09 |
| F11          | coagulation factor XI                                                                                                                       | A_23_P41314  | -1.2 | 1.2E-02 |
| KIAA1244     | KIAA1244                                                                                                                                    | A_32_P498899 | -1.2 | 8.3E-03 |
| CDKL5        | cyclin-dependent kinase-like 5                                                                                                              | A_24_P282343 | -1.2 | 6.2E-08 |
| SLC27A3      | solute carrier family 27 (fatty acid transporter), member 3                                                                                 | A_24_P179816 | -1.2 | 1.2E-07 |
| IL18RAP      | interleukin 18 receptor accessory protein                                                                                                   | A_23_P28334  | -1.2 | 8.8E-03 |
| EDA          | ectodysplasin A                                                                                                                             | A_23_P34045  | -1.2 | 3.3E-08 |
| AOC3         | amine oxidase, copper containing 3 (vascular adhesion protein 1)                                                                            | A_23_P426305 | -1.2 | 5.9E-06 |
| LOC100128840 | hypothetical LOC100128840                                                                                                                   | A_24_P93675  | -1.2 | 4.2E-02 |
| C1orf145     | chromosome 1 open reading frame 145                                                                                                         | A_24_P15898  | -1.2 | 1.5E-03 |
| C6orf223     | chromosome 6 open reading frame 223                                                                                                         | A_23_P348183 | -1.2 | 8.4E-04 |
| GSTA4        | glutathione S-transferase alpha 4                                                                                                           | A_23_P110941 | -1.2 | 3.0E-09 |
| F8           | coagulation factor VIII, procoagulant component                                                                                             | A_23_P217643 | -1.2 | 6.9E-04 |
| RGN          | regucalcin (senescence marker protein-30)                                                                                                   | A_23_P114423 | -1.2 | 2.4E-05 |
| PLCXD3       | phosphatidylinositol-specific phospholipase C, X domain containing 3                                                                        | A_32_P119033 | -1.2 | 1.3E-02 |
| NRBP2        | nuclear receptor binding protein 2                                                                                                          | A_24_P242132 | -1.2 | 1.4E-05 |
| SLC9A3R2     | solute carrier family 9 (sodium/hydrogen exchanger), member 3 regulator 2                                                                   | A_24_P364838 | -1.2 | 1.9E-03 |
| LMTK2        | lemur tyrosine kinase 2                                                                                                                     | A_23_P215275 | -1.2 | 4.1E-07 |
| IRS2         | insulin receptor substrate 2                                                                                                                | A_24_P154037 | -1.2 | 1.4E-04 |
| RHOBTB2      | Rho-related BTB domain containing 2                                                                                                         | A_23_P20427  | -1.2 | 6.6E-05 |
| RAMP2        | receptor (G protein-coupled) activity modifying protein 2                                                                                   | A_24_P116710 | -1.2 | 1.2E-02 |
| SYN2         | synapsin II                                                                                                                                 | A_23_P109812 | -1.2 | 1.2E-05 |
| CASKIN2      | CASK interacting protein 2                                                                                                                  | A_23_P44363  | -1.2 | 1.4E-04 |
| NAV2         | neuron navigator 2                                                                                                                          | A_24_P933580 | -1.2 | 1.9E-03 |
| SIGLEC5      | sialic acid binding Ig-like lectin 5                                                                                                        | A_23_P15995  | -1.2 | 8.9E-03 |
| SEMA5A       | sema domain, seven thrombospondin repeats (type 1 and type 1-like), transmembrane domain (TM) and short cytoplasmic domain, (semaphorin) 5A | A_23_P213415 | -1.2 | 7.7E-04 |
| IFNGR1       | interferon gamma receptor 1                                                                                                                 | A_23_P8281   | -1.2 | 1.6E-08 |
| LOC253264    | hypothetical LOC253264                                                                                                                      | A_24_P589001 | -1.2 | 3.2E-03 |
| NCR1         | natural cytotoxicity triggering receptor 1                                                                                                  | A_23_P108042 | -1.2 | 3.0E-02 |
| GPR20        | G protein-coupled receptor 20                                                                                                               | A_23_P159237 | -1.2 | 2.3E-04 |
| PDGFRA       | platelet-derived growth factor receptor, alpha polypeptide                                                                                  | A_23_P332536 | -1.2 | 1.8E-02 |
| ID1          | inhibitor of DNA binding 1, dominant negative helix-loop-helix protein                                                                      | A_23_P252306 | -1.2 | 3.7E-04 |
| KIR3DL2      | killer cell immunoglobulin-like receptor, three                                                                                             | A_23_P101636 | -1.2 | 1.5E-02 |

|           |                                                              |              |      |         |
|-----------|--------------------------------------------------------------|--------------|------|---------|
|           | domains, long cytoplasmic tail, 2                            |              |      |         |
| ANKRD29   | ankyrin repeat domain 29                                     | A_23_P412577 | -1.2 | 6.0E-05 |
| NTNG1     | netrin G1                                                    | A_23_P201547 | -1.1 | 8.9E-05 |
| SYTL4     | synaptotagmin-like 4                                         | A_24_P122337 | -1.1 | 1.2E-07 |
| TENC1     | tensin like C1 domain containing phosphatase (tensin 2)      | A_23_P151297 | -1.1 | 3.3E-08 |
| MEIS2     | Meis homeobox 2                                              | A_24_P82200  | -1.1 | 3.1E-04 |
| ATOH8     | atonal homolog 8 (Drosophila)                                | A_23_P142878 | -1.1 | 2.9E-05 |
| GNMT      | glycine N-methyltransferase                                  | A_23_P7957   | -1.1 | 1.1E-06 |
| HMGCS1    | 3-hydroxy-3-methylglutaryl-CoA synthase 1 (soluble)          | A_24_P63522  | -1.1 | 1.6E-04 |
| SYBU      | syntabulin (syntaxin-interacting)                            | A_23_P134734 | -1.1 | 2.3E-03 |
| CGN       | cingulin                                                     | A_24_P45728  | -1.1 | 4.8E-06 |
| ARHGAP31  | Rho GTPase activating protein 31                             | A_24_P349039 | -1.1 | 2.8E-05 |
| ABCA6     | ATP-binding cassette, sub-family A (ABC1), member 6          | A_24_P378581 | -1.1 | 2.7E-02 |
| C19orf59  | chromosome 19 open reading frame 59                          | A_23_P330561 | -1.1 | 3.3E-02 |
| C13orf1   | chromosome 13 open reading frame 1                           | A_23_P368718 | -1.1 | 2.9E-05 |
| PRELP     | proline/arginine-rich end leucine-rich repeat protein        | A_24_P815488 | -1.1 | 3.3E-02 |
| CSF2      | colony stimulating factor 2 (granulocyte-macrophage)         | A_23_P133408 | -1.1 | 9.3E-03 |
| STXBP3    | syntaxin binding protein 3                                   | A_24_P920418 | -1.1 | 1.5E-03 |
| KIAA0754  | KIAA0754                                                     | A_24_P912372 | -1.1 | 2.6E-04 |
| FGL1      | fibrinogen-like 1                                            | A_23_P20484  | -1.1 | 3.5E-04 |
| RNF128    | ring finger protein 128                                      | A_24_P340036 | -1.1 | 6.8E-04 |
| CSPG4     | chondroitin sulfate proteoglycan 4                           | A_23_P21976  | -1.1 | 1.7E-04 |
| GJC3      | gap junction protein, gamma 3, 30.2kDa                       | A_23_P59869  | -1.1 | 1.7E-03 |
| RNF144B   | ring finger protein 144B                                     | A_24_P406060 | -1.1 | 1.5E-05 |
| TMEM106C  | transmembrane protein 106C                                   | A_23_P48175  | -1.1 | 2.8E-09 |
| AZGP1     | alpha-2-glycoprotein 1, zinc-binding                         | A_23_P71268  | -1.1 | 4.0E-02 |
| FRYL      | FRY-like                                                     | A_24_P308109 | -1.1 | 1.2E-04 |
| NOSTRIN   | nitric oxide synthase trafficker                             | A_23_P79360  | -1.1 | 1.8E-04 |
| SLC26A9   | solute carrier family 26, member 9                           | A_23_P201248 | -1.1 | 4.6E-02 |
| SPDYE1    | speedy homolog E1 (Xenopus laevis)                           | A_23_P425967 | -1.1 | 1.3E-04 |
| CDH10     | cadherin 10, type 2 (T2-cadherin)                            | A_23_P144656 | -1.1 | 7.3E-03 |
| GGT2      | gamma-glutamyltransferase 2                                  | A_24_P83848  | -1.1 | 4.6E-05 |
| REPS2     | RALBP1 associated Eps domain containing 2                    | A_23_P251387 | -1.1 | 2.4E-11 |
| SRPX      | sushi-repeat containing protein, X-linked                    | A_23_P96383  | -1.1 | 6.0E-05 |
| ANKS1A    | ankyrin repeat and sterile alpha motif domain containing 1A  | A_23_P156748 | -1.1 | 3.3E-08 |
| RAB11FIP1 | RAB11 family interacting protein 1 (class I)                 | A_24_P945029 | -1.1 | 2.3E-03 |
| DGKG      | diacylglycerol kinase, gamma 90kDa                           | A_23_P40926  | -1.1 | 1.2E-05 |
| NXF3      | nuclear RNA export factor 3                                  | A_23_P171336 | -1.1 | 2.2E-03 |
| CACNA1D   | calcium channel, voltage-dependent, L type, alpha 1D subunit | A_23_P365767 | -1.1 | 1.3E-04 |



|           |                                                                            |              |      |         |
|-----------|----------------------------------------------------------------------------|--------------|------|---------|
| FAM46B    | family with sequence similarity 46, member B                               | A_23_P12199  | -1.1 | 1.7E-06 |
| C2orf88   | chromosome 2 open reading frame 88                                         | A_23_P17130  | -1.1 | 3.2E-03 |
| EPDR1     | ependymin related protein 1 (zebrafish)                                    | A_24_P166613 | -1.1 | 9.0E-07 |
| PAQR5     | progesterin and adipoQ receptor family member V                            | A_24_P944331 | -1.1 | 1.6E-03 |
| LOC256021 | hypothetical protein LOC256021                                             | A_32_P437735 | -1.1 | 9.2E-03 |
| ITSN2     | intersectin 2                                                              | A_24_P239988 | -1.1 | 2.3E-07 |
| CLIC3     | chloride intracellular channel 3                                           | A_23_P254654 | -1.1 | 9.3E-03 |
| HOXA6     | homeobox A6                                                                | A_23_P82370  | -1.1 | 6.2E-03 |
| LOC401022 | hypothetical LOC401022                                                     | A_23_P344673 | -1.1 | 1.6E-03 |
| CHI3L2    | chitinase 3-like 2                                                         | A_23_P12082  | -1.1 | 3.1E-02 |
| CD300LG   | CD300 molecule-like family member g                                        | A_23_P38304  | -1.1 | 2.8E-04 |
| C1orf21   | chromosome 1 open reading frame 21                                         | A_23_P113161 | -1.1 | 4.4E-05 |
| SH3BGRL2  | SH3 domain binding glutamic acid-rich protein like 2                       | A_24_P226322 | -1.1 | 1.4E-03 |
| LRP1B     | low density lipoprotein receptor-related protein 1B                        | A_23_P5342   | -1.1 | 3.7E-06 |
| CNR1      | cannabinoid receptor 1 (brain)                                             | A_23_P214208 | -1.1 | 2.9E-03 |
| CEBPA     | CCAAT/enhancer binding protein (C/EBP), alpha                              | A_23_P375494 | -1.1 | 8.6E-04 |
| MT1E      | metallothionein 1E                                                         | A_23_P420942 | -1.1 | 4.9E-02 |
| PPFIBP1   | PTPRF interacting protein, binding protein 1 (liprin beta 1)               | A_23_P337917 | -1.1 | 1.2E-05 |
| BAI3      | brain-specific angiogenesis inhibitor 3                                    | A_23_P252556 | -1.1 | 4.5E-03 |
| HOXA5     | homeobox A5                                                                | A_23_P93772  | -1.1 | 9.0E-04 |
| DENND3    | DENN/MADD domain containing 3                                              | A_32_P175301 | -1.1 | 1.4E-06 |
| SOX13     | SRY (sex determining region Y)-box 13                                      | A_23_P85703  | -1.1 | 4.2E-08 |
| TMEM125   | transmembrane protein 125                                                  | A_23_P115022 | -1.1 | 1.0E-04 |
| ESAM      | endothelial cell adhesion molecule                                         | A_23_P47410  | -1.1 | 4.3E-06 |
| FZD8      | frizzled homolog 8 (Drosophila)                                            | A_23_P396858 | -1.1 | 2.7E-04 |
| WISP2     | WNT1 inducible signaling pathway protein 2                                 | A_23_P102611 | -1.1 | 2.1E-02 |
| LRRC16A   | leucine rich repeat containing 16A                                         | A_23_P19369  | -1.1 | 6.1E-09 |
| C20orf160 | chromosome 20 open reading frame 160                                       | A_23_P91414  | -1.1 | 1.8E-04 |
| ALS2CR8   | amyotrophic lateral sclerosis 2 (juvenile) chromosome region, candidate 8  | A_24_P911896 | -1.1 | 6.5E-04 |
| OR7A5     | olfactory receptor, family 7, subfamily A, member 5                        | A_23_P16630  | -1.1 | 1.1E-03 |
| GRM8      | glutamate receptor, metabotropic 8                                         | A_32_P8221   | -1.1 | 1.1E-05 |
| APOD      | apolipoprotein D                                                           | A_23_P136777 | -1.1 | 4.4E-02 |
| ADD1      | adducin 1 (alpha)                                                          | A_24_P109272 | -1.1 | 2.0E-05 |
| MMP25     | matrix metalloproteinase 25                                                | A_23_P376557 | -1.1 | 8.4E-03 |
| S100A8    | S100 calcium binding protein A8                                            | A_23_P434809 | -1.1 | 4.0E-03 |
| TOLLIP    | toll interacting protein                                                   | A_24_P287189 | -1.1 | 1.6E-02 |
| ST7       | suppression of tumorigenicity 7                                            | A_24_P141019 | -1.1 | 1.1E-07 |
| MGAT3     | mannosyl (beta-1,4-)-glycoprotein beta-1,4-N-acetylglucosaminyltransferase | A_24_P245838 | -1.1 | 1.5E-03 |
| CADM1     | cell adhesion molecule 1                                                   | A_24_P227230 | -1.1 | 8.9E-03 |
| MS4A15    | membrane-spanning 4-domains, subfamily A,                                  | A_24_P30389  | -1.1 | 1.2E-05 |

|            |                                                                                                                                            |              |      |         |
|------------|--------------------------------------------------------------------------------------------------------------------------------------------|--------------|------|---------|
|            | member 15                                                                                                                                  |              |      |         |
| TDRD10     | tudor domain containing 10                                                                                                                 | A_23_P423108 | -1.1 | 3.6E-04 |
| S1PR1      | sphingosine-1-phosphate receptor 1                                                                                                         | A_23_P404481 | -1.1 | 4.3E-04 |
| AHNAK      | AHNAK nucleoprotein                                                                                                                        | A_23_P21363  | -1.1 | 3.1E-06 |
| SHROOM2    | shroom family member 2                                                                                                                     | A_23_P217755 | -1.1 | 6.3E-04 |
| N4BP2L2-IT | N4BP2L2 intronic transcript (non-protein coding)                                                                                           | A_24_P500771 | -1.1 | 2.1E-02 |
| AKR1C4     | aldo-keto reductase family 1, member C4 (chlordecone reductase; 3-alpha hydroxysteroid dehydrogenase, type I; dihydrodiol dehydrogenase 4) | A_23_P149926 | -1.1 | 1.6E-03 |
| PHF17      | PHD finger protein 17                                                                                                                      | A_23_P167263 | -1.1 | 7.9E-06 |
| PTPRM      | protein tyrosine phosphatase, receptor type, M                                                                                             | A_23_P159255 | -1.1 | 8.8E-08 |
| SYCP2L     | synaptonemal complex protein 2-like                                                                                                        | A_23_P347777 | -1.1 | 7.8E-03 |
| GLT25D2    | glycosyltransferase 25 domain containing 2                                                                                                 | A_24_P62505  | -1.1 | 5.6E-04 |
| SMAGP      | small cell adhesion glycoprotein                                                                                                           | A_23_P318115 | -1.1 | 4.4E-08 |
| FLVCR2     | feline leukemia virus subgroup C cellular receptor family, member 2                                                                        | A_23_P140373 | -1.1 | 1.7E-02 |
| CD5L       | CD5 molecule-like                                                                                                                          | A_23_P126584 | -1.1 | 2.2E-03 |
| ADH1A      | alcohol dehydrogenase 1A (class I), alpha polypeptide                                                                                      | A_24_P291658 | -1.1 | 4.9E-03 |
| LOC728800  | similar to FLJ00402 protein                                                                                                                | A_24_P247823 | -1.1 | 8.2E-03 |
| MAPT       | microtubule-associated protein tau                                                                                                         | A_24_P224488 | -1.1 | 1.7E-04 |
| OTC        | ornithine carbamoyltransferase                                                                                                             | A_23_P257355 | -1.1 | 7.3E-03 |
| ADRA1A     | adrenergic, alpha-1A-, receptor                                                                                                            | A_23_P8938   | -1.1 | 2.4E-03 |
| AOX1       | aldehyde oxidase 1                                                                                                                         | A_23_P154037 | -1.1 | 6.8E-04 |
| PPP4R4     | protein phosphatase 4, regulatory subunit 4                                                                                                | A_23_P425332 | -1.1 | 3.7E-02 |
| OPHN1      | oligophrenin 1                                                                                                                             | A_23_P417753 | -1.1 | 9.1E-05 |
| NKD1       | naked cuticle homolog 1 (Drosophila)                                                                                                       | A_23_P429449 | -1.1 | 8.0E-06 |
| C17orf55   | chromosome 17 open reading frame 55                                                                                                        | A_24_P323084 | -1.1 | 1.1E-04 |
| FAM106C    | Protein FAM106C                                                                                                                            | A_24_P164505 | -1.1 | 6.8E-03 |
| GPD1L      | glycerol-3-phosphate dehydrogenase 1-like                                                                                                  | A_24_P362916 | -1.1 | 6.3E-04 |
| FOXP2      | forkhead box P2                                                                                                                            | A_24_P921683 | -1.1 | 2.7E-02 |
| WASF3      | WAS protein family, member 3                                                                                                               | A_24_P176079 | -1.1 | 7.6E-08 |
| LOC283701  | hypothetical LOC283701                                                                                                                     | A_24_P222176 | -1.1 | 5.5E-04 |
| PREX1      | phosphatidylinositol-3,4,5-trisphosphate-dependent Rac exchange factor 1                                                                   | A_23_P413641 | -1.1 | 5.8E-05 |
| GCNT2      | glucosaminyl (N-acetyl) transferase 2, I-branching enzyme (I blood group)                                                                  | A_24_P397489 | -1.1 | 1.5E-04 |
| PIK3R1     | phosphoinositide-3-kinase, regulatory subunit 1 (alpha)                                                                                    | A_24_P29401  | -1.1 | 1.6E-05 |
| RHOT1      | ras homolog gene family, member T1                                                                                                         | A_23_P433204 | -1.1 | 1.7E-03 |
| FGFR4      | fibroblast growth factor receptor 4                                                                                                        | A_23_P92754  | -1.1 | 3.6E-05 |
| FAM84B     | family with sequence similarity 84, member B                                                                                               | A_24_P943709 | -1.1 | 2.2E-03 |
| SASH1      | SAM and SH3 domain containing 1                                                                                                            | A_23_P93442  | -1.1 | 5.4E-06 |
| CTH        | cystathionase (cystathionine gamma-lyase)                                                                                                  | A_23_P126103 | -1.1 | 2.1E-05 |

|           |                                                               |              |      |         |
|-----------|---------------------------------------------------------------|--------------|------|---------|
| DOCK4     | dedicator of cytokinesis 4                                    | A_32_P134056 | -1.1 | 2.0E-02 |
| PCYT2     | phosphate cytidyltransferase 2, ethanolamine                  | A_24_P404245 | -1.1 | 5.0E-07 |
| C6orf114  | chromosome 6 open reading frame 114                           | A_23_P134058 | -1.1 | 2.1E-03 |
| GHR       | growth hormone receptor                                       | A_24_P72064  | -1.0 | 1.2E-03 |
| RALGAPA2  | Ral GTPase activating protein, alpha subunit 2 (catalytic)    | A_24_P941946 | -1.0 | 2.0E-03 |
| WNT7A     | wingless-type MMTV integration site family, member 7A         | A_23_P258410 | -1.0 | 3.4E-03 |
| BNIP3     | BCL2/adenovirus E1B 19kDa interacting protein 3               | A_23_P138635 | -1.0 | 3.6E-09 |
| NOS1      | nitric oxide synthase 1 (neuronal)                            | A_32_P332320 | -1.0 | 1.0E-02 |
| PODXL     | podocalyxin-like                                              | A_23_P215060 | -1.0 | 2.0E-04 |
| MCF2L     | MCF.2 cell line derived transforming sequence-like            | A_23_P99496  | -1.0 | 9.4E-03 |
| KCTD14    | potassium channel tetramerisation domain containing 14        | A_23_P162165 | -1.0 | 4.7E-05 |
| C20orf112 | chromosome 20 open reading frame 112                          | A_23_P91423  | -1.0 | 1.4E-04 |
| CALCOCO2  | calcium binding and coiled-coil domain 2                      | A_24_P330773 | -1.0 | 4.4E-07 |
| HSPA12B   | heat shock 70kD protein 12B                                   | A_23_P91334  | -1.0 | 9.1E-04 |
| FMN1      | formin 1                                                      | A_32_P180825 | -1.0 | 4.5E-05 |
| IGSF10    | immunoglobulin superfamily, member 10                         | A_23_P333683 | -1.0 | 1.7E-03 |
| ASRGL1    | asparaginase like 1                                           | A_23_P379864 | -1.0 | 4.7E-04 |
| SHE       | Src homology 2 domain containing E                            | A_23_P400716 | -1.0 | 6.5E-05 |
| ALOX12    | arachidonate 12-lipoxygenase                                  | A_23_P152906 | -1.0 | 3.3E-03 |
| SPSB2     | splA/ryanodine receptor domain and SOCS box containing 2      | A_23_P151098 | -1.0 | 7.7E-07 |
| ASAH1     | N-acylsphingosine amidohydrolase (acid ceramidase) 1          | A_24_P928637 | -1.0 | 1.3E-05 |
| INPP5A    | inositol polyphosphate-5-phosphatase, 40kDa                   | A_23_P202307 | -1.0 | 5.4E-06 |
| WWC3      | WWC family member 3                                           | A_23_P345650 | -1.0 | 7.2E-07 |
| GGT3P     | gamma-glutamyltransferase 3 pseudogene                        | A_24_P42066  | -1.0 | 5.6E-06 |
| PRKCE     | protein kinase C, epsilon                                     | A_23_P348194 | -1.0 | 2.5E-02 |
| PCDH12    | protocadherin 12                                              | A_23_P423309 | -1.0 | 5.0E-03 |
| HIP1      | huntingtin interacting protein 1                              | A_24_P363548 | -1.0 | 5.6E-04 |
| ADAMTS2   | ADAM metalloproteinase with thrombospondin type 1 motif, 2    | A_23_P213615 | -1.0 | 4.3E-05 |
| PKDCC     | protein kinase domain containing, cytoplasmic homolog (mouse) | A_32_P112493 | -1.0 | 7.2E-05 |
| SCAI      | suppressor of cancer cell invasion                            | A_24_P481431 | -1.0 | 4.1E-05 |
| OCLN      | occludin                                                      | A_24_P102053 | -1.0 | 3.9E-04 |
| DSCR6     | Down syndrome critical region gene 6                          | A_23_P109320 | -1.0 | 1.3E-05 |
| USP13     | ubiquitin specific peptidase 13 (isopeptidase T-3)            | A_23_P40989  | -1.0 | 6.6E-07 |
| CAMKMT    | calmodulin-lysine N-methyltransferase                         | A_24_P926285 | -1.0 | 1.4E-03 |
| CLCN4     | chloride channel 4                                            | A_23_P217741 | -1.0 | 6.1E-07 |
| KLF13     | Kruppel-like factor 13                                        | A_32_P197489 | -1.0 | 1.1E-08 |
| FCHO2     | FCH domain only 2                                             | A_23_P420610 | -1.0 | 3.0E-05 |
| KIAA1324L | KIAA1324-like                                                 | A_23_P320242 | -1.0 | 4.9E-03 |

|              |                                                                     |              |      |         |
|--------------|---------------------------------------------------------------------|--------------|------|---------|
| USP53        | ubiquitin specific peptidase 53                                     | A_24_P137522 | -1.0 | 2.0E-05 |
| GNAQ         | guanine nucleotide binding protein (G protein), q polypeptide       | A_24_P585770 | -1.0 | 1.4E-04 |
| LIN7A        | lin-7 homolog A (C. elegans)                                        | A_23_P99253  | -1.0 | 2.0E-05 |
| MKNK2        | MAP kinase interacting serine/threonine kinase 2                    | A_23_P142310 | -1.0 | 2.4E-08 |
| SULT1A4      | sulfotransferase family, cytosolic, 1A, phenol-preferring, member 4 | A_24_P262201 | -1.0 | 2.0E-07 |
| ANK3         | ankyrin 3, node of Ranvier (ankyrin G)                              | A_32_P33304  | -1.0 | 1.5E-02 |
| TSC22D3      | TSC22 domain family, member 3                                       | A_23_P217688 | -1.0 | 1.3E-03 |
| C4orf39      | chromosome 4 open reading frame 39                                  | A_32_P193583 | -1.0 | 3.6E-03 |
| RAPGEF5      | Rap guanine nucleotide exchange factor (GEF) 5                      | A_23_P215505 | -1.0 | 2.1E-03 |
| ACVRL1       | activin A receptor type II-like 1                                   | A_24_P324783 | -1.0 | 4.4E-03 |
| LOC79999     | hypothetical LOC79999                                               | A_23_P4052   | -1.0 | 4.9E-05 |
| AFAP1L1      | actin filament associated protein 1-like 1                          | A_32_P167239 | -1.0 | 4.7E-05 |
| LOC151878    | hypothetical protein LOC151878                                      | A_32_P152237 | -1.0 | 2.3E-02 |
| DAAM1        | dishevelled associated activator of morphogenesis 1                 | A_24_P604851 | -1.0 | 6.5E-03 |
| PCDH9        | protocadherin 9                                                     | A_24_P187218 | -1.0 | 2.8E-02 |
| KANK4        | KN motif and ankyrin repeat domains 4                               | A_32_P51237  | -1.0 | 4.3E-02 |
| DIO3OS       | DIO3 opposite strand (non-protein coding)                           | A_24_P759584 | -1.0 | 4.8E-03 |
| SORBS2       | sorbin and SH3 domain containing 2                                  | A_23_P257562 | -1.0 | 6.9E-05 |
| FAM65B       | family with sequence similarity 65, member B                        | A_23_P358394 | -1.0 | 7.8E-03 |
| HRSP12       | heat-responsive protein 12                                          | A_23_P134714 | -1.0 | 2.1E-10 |
| TXNRD1       | thioredoxin reductase 1                                             | A_23_P204581 | -1.0 | 2.1E-06 |
| HAL          | histidine ammonia-lyase                                             | A_23_P61637  | -1.0 | 2.3E-02 |
| LOC100128219 | hypothetical protein LOC100128219                                   | A_24_P299178 | -1.0 | 9.7E-04 |
| LPAL2        | lipoprotein, Lp(a)-like 2, pseudogene                               | A_32_P14178  | -1.0 | 2.4E-02 |
| PIK3C2A      | phosphoinositide-3-kinase, class 2, alpha polypeptide               | A_23_P36166  | -1.0 | 3.7E-06 |
| NRGN         | neurogranin (protein kinase C substrate, RC3)                       | A_23_P116264 | -1.0 | 5.2E-05 |
| PPP1R14A     | protein phosphatase 1, regulatory (inhibitor) subunit 14A           | A_24_P296772 | -1.0 | 8.5E-04 |
| NES          | nestin                                                              | A_23_P103672 | -1.0 | 5.5E-05 |
| WSCD1        | WSC domain containing 1                                             | A_24_P942493 | -1.0 | 7.0E-03 |
| SORT1        | sortilin 1                                                          | A_32_P7176   | -1.0 | 1.3E-04 |
| LAMB1        | laminin, beta 1                                                     | A_23_P94030  | -1.0 | 2.2E-05 |
| USP44        | ubiquitin specific peptidase 44                                     | A_23_P72770  | -1.0 | 2.3E-05 |
| TMEM2        | transmembrane protein 2                                             | A_24_P261125 | -1.0 | 4.3E-03 |
| VWF          | von Willebrand factor                                               | A_32_P150382 | -1.0 | 1.3E-02 |
| PCTP         | phosphatidylcholine transfer protein                                | A_23_P4041   | -1.0 | 5.5E-06 |
| SRGAP2       | SLIT-ROBO Rho GTPase activating protein 2                           | A_32_P50123  | -1.0 | 1.4E-04 |
| RAPGEF4      | Rap guanine nucleotide exchange factor (GEF) 4                      | A_23_P17197  | -1.0 | 2.3E-02 |
| MECOM        | MDS1 and EVI1 complex locus                                         | A_24_P15154  | -1.0 | 4.2E-02 |
| PKNOX2       | PBX/knotted 1 homeobox 2                                            | A_23_P75529  | -1.0 | 1.4E-03 |

|              |                                                                          |              |      |         |
|--------------|--------------------------------------------------------------------------|--------------|------|---------|
| SLC48A1      | solute carrier family 48 (heme transporter), member 1                    | A_24_P309594 | -1.0 | 2.1E-09 |
| EMCN         | endomucin                                                                | A_32_P213521 | -1.0 | 1.2E-02 |
| KIAA1274     | KIAA1274                                                                 | A_23_P161481 | -1.0 | 1.4E-04 |
| KIF13A       | kinesin family member 13A                                                | A_24_P230691 | -1.0 | 2.6E-03 |
| LEPR         | leptin receptor                                                          | A_23_P161135 | -1.0 | 2.2E-02 |
| DMTF1        | cyclin D binding myb-like transcription factor 1                         | A_32_P37584  | -1.0 | 2.1E-04 |
| KBTBD3       | kelch repeat and BTB (POZ) domain containing 3                           | A_23_P127553 | -1.0 | 3.2E-02 |
| AKAP9        | A kinase (PRKA) anchor protein (yotiao) 9                                | A_24_P916797 | -1.0 | 2.7E-02 |
| CAV2         | caveolin 2                                                               | A_24_P925040 | -1.0 | 1.4E-03 |
| LRR31        | leucine rich repeat containing 31                                        | A_24_P240259 | -1.0 | 3.5E-03 |
| C1orf116     | chromosome 1 open reading frame 116                                      | A_23_P897    | -1.0 | 3.4E-03 |
| TMEM180      | transmembrane protein 180                                                | A_23_P337729 | -1.0 | 7.7E-07 |
| COBLL1       | COBL-like 1                                                              | A_24_P915926 | -1.0 | 2.5E-02 |
| NCOA3        | nuclear receptor coactivator 3                                           | A_23_P313568 | -1.0 | 9.3E-08 |
| PLA2G3       | phospholipase A2, group III                                              | A_23_P17814  | -1.0 | 6.6E-04 |
| SIGLEC10     | sialic acid binding Ig-like lectin 10                                    | A_23_P208182 | -1.0 | 3.0E-02 |
| SC4MOL       | sterol-C4-methyl oxidase-like                                            | A_23_P110184 | -1.0 | 1.6E-03 |
| BDNF         | brain-derived neurotrophic factor                                        | A_23_P127891 | -1.0 | 1.6E-02 |
| SECISBP2L    | SECIS binding protein 2-like                                             | A_24_P82135  | -1.0 | 3.0E-06 |
| TPM1         | tropomyosin 1 (alpha)                                                    | A_32_P185140 | -1.0 | 1.7E-03 |
| BMPER        | BMP binding endothelial regulator                                        | A_23_P31287  | -1.0 | 1.0E-02 |
| ARHGEF10     | Rho guanine nucleotide exchange factor (GEF) 10                          | A_23_P356216 | -1.0 | 2.4E-02 |
| TUFT1        | tuftelin 1                                                               | A_32_P141184 | -1.0 | 2.7E-05 |
| FRY          | furry homolog (Drosophila)                                               | A_23_P105862 | -1.0 | 4.8E-06 |
| NFE2         | nuclear factor (erythroid-derived 2), 45kDa                              | A_23_P13753  | -1.0 | 7.8E-04 |
| AGTPBP1      | ATP/GTP binding protein 1                                                | A_24_P350832 | -1.0 | 2.2E-03 |
| SP100        | SP100 nuclear antigen                                                    | A_24_P916816 | -1.0 | 7.9E-03 |
| TBX2         | T-box 2                                                                  | A_23_P164451 | -1.0 | 9.2E-04 |
| SLC22A3      | solute carrier family 22 (extraneuronal monoamine transporter), member 3 | A_32_P309404 | -1.0 | 1.6E-02 |
| C1orf210     | chromosome 1 open reading frame 210                                      | A_32_P42946  | -1.0 | 2.1E-06 |
| SHMT1        | serine hydroxymethyltransferase 1 (soluble)                              | A_23_P502654 | -1.0 | 6.9E-06 |
| MAMDC2       | MAM domain containing 2                                                  | A_23_P157914 | -1.0 | 2.5E-02 |
| PRODH        | proline dehydrogenase (oxidase) 1                                        | A_23_P68786  | -1.0 | 1.1E-03 |
| HMBOX1       | homeobox containing 1                                                    | A_23_P134684 | -1.0 | 2.5E-03 |
| NOXO1        | NADPH oxidase organizer 1                                                | A_23_P413051 | -1.0 | 6.3E-05 |
| RIMS3        | regulating synaptic membrane exocytosis 3                                | A_23_P319583 | -1.0 | 6.8E-05 |
| RRAS         | related RAS viral (r-ras) oncogene homolog                               | A_23_P39076  | -1.0 | 9.4E-08 |
| LOC100506495 | hypothetical LOC100506495                                                | A_32_P171530 | -1.0 | 7.7E-03 |
| THSD1        | thrombospondin, type I, domain containing 1                              | A_23_P14184  | -1.0 | 1.5E-04 |
| MARVELD2     | MARVEL domain containing 2                                               | A_24_P106363 | -1.0 | 1.4E-03 |

|              |                                                                                         |              |      |         |
|--------------|-----------------------------------------------------------------------------------------|--------------|------|---------|
| FIGN         | fidgetin                                                                                | A_23_P165909 | -1.0 | 1.0E-02 |
| SPARCL1      | SPARC-like 1 (hevin)                                                                    | A_32_P208341 | -0.9 | 5.4E-06 |
| ACACB        | acetyl-CoA carboxylase beta                                                             | A_23_P87791  | -0.9 | 1.2E-03 |
| ALDH6A1      | aldehyde dehydrogenase 6 family, member A1                                              | A_23_P128967 | -0.9 | 1.3E-08 |
| CMTM8        | CKLF-like MARVEL transmembrane domain containing 8                                      | A_23_P40880  | -0.9 | 4.9E-06 |
| SPOCK2       | sparc/osteonectin, cwcv and kazal-like domains proteoglycan (testican) 2                | A_23_P161280 | -0.9 | 9.9E-03 |
| B3GALT2      | UDP-Gal:betaGlcNAc beta 1,3-galactosyltransferase, polypeptide 2                        | A_23_P499    | -0.9 | 5.0E-04 |
| LOC100133319 | PRO1804                                                                                 | A_24_P376599 | -0.9 | 4.5E-04 |
| ETV1         | ets variant 1                                                                           | A_32_P78491  | -0.9 | 3.2E-03 |
| GALNTL2      | UDP-N-acetyl-alpha-D-galactosamine:polypeptide N-acetylgalactosaminyltransferase-like 2 | A_23_P212119 | -0.9 | 3.3E-02 |
| AK1          | adenylate kinase 1                                                                      | A_23_P217088 | -0.9 | 2.1E-05 |
| JPH1         | junctophilin 1                                                                          | A_23_P434253 | -0.9 | 1.0E-04 |
| TRIM4        | tripartite motif containing 4                                                           | A_24_P68247  | -0.9 | 2.3E-07 |
| TCN2         | transcobalamin II                                                                       | A_23_P40611  | -0.9 | 3.9E-04 |
| CGNL1        | cingulin-like 1                                                                         | A_23_P163306 | -0.9 | 3.2E-04 |
| EBP          | emopamil binding protein (sterol isomerase)                                             | A_23_P171077 | -0.9 | 4.4E-08 |
| ABCB6        | ATP-binding cassette, sub-family B (MDR/TAP), member 6                                  | A_23_P5441   | -0.9 | 1.3E-05 |
| PCYOX1       | prenylcysteine oxidase 1                                                                | A_24_P940517 | -0.9 | 5.9E-05 |
| FAM174B      | family with sequence similarity 174, member B                                           | A_23_P100001 | -0.9 | 7.1E-05 |
| LOC729680    | hypothetical protein LOC729680                                                          | A_32_P46840  | -0.9 | 1.1E-02 |
| FNBP1L       | formin binding protein 1-like                                                           | A_24_P366967 | -0.9 | 2.0E-06 |
| C15orf52     | chromosome 15 open reading frame 52                                                     | A_23_P163467 | -0.9 | 1.3E-04 |
| RASIP1       | Ras interacting protein 1                                                               | A_23_P119353 | -0.9 | 5.2E-04 |
| APOL4        | apolipoprotein L, 4                                                                     | A_24_P374163 | -0.9 | 3.6E-02 |
| INPP5K       | inositol polyphosphate-5-phosphatase K                                                  | A_23_P55076  | -0.9 | 2.3E-07 |
| SIRT4        | sirtuin 4                                                                               | A_23_P99226  | -0.9 | 9.6E-04 |
| FBXO9        | F-box protein 9                                                                         | A_24_P106522 | -0.9 | 3.3E-04 |
| LOC284998    | hypothetical LOC284998                                                                  | A_24_P498854 | -0.9 | 3.3E-03 |
| MED17        | mediator complex subunit 17                                                             | A_24_P941459 | -0.9 | 2.0E-04 |
| PPP1R9A      | protein phosphatase 1, regulatory (inhibitor) subunit 9A                                | A_23_P145824 | -0.9 | 1.9E-05 |
| CD302        | CD302 molecule                                                                          | A_23_P131435 | -0.9 | 2.7E-05 |
| GPR141       | G protein-coupled receptor 141                                                          | A_24_P334718 | -0.9 | 4.8E-04 |
| CSF3R        | colony stimulating factor 3 receptor (granulocyte)                                      | A_23_P126218 | -0.9 | 2.1E-04 |
| GPR146       | G protein-coupled receptor 146                                                          | A_23_P20035  | -0.9 | 1.0E-03 |
| HIST1H2AL    | histone cluster 1, H2aI                                                                 | A_23_P363174 | -0.9 | 1.1E-02 |
| C12orf69     | chromosome 12 open reading frame 69                                                     | A_24_P66969  | -0.9 | 4.9E-02 |
| C5orf25      | chromosome 5 open reading frame 25                                                      | A_24_P930169 | -0.9 | 2.7E-05 |
| MLH3         | mutL homolog 3 (E. coli)                                                                | A_24_P61520  | -0.9 | 2.9E-03 |
| STX11        | syntaxin 11                                                                             | A_23_P156788 | -0.9 | 6.2E-04 |

|              |                                                                                     |              |      |         |
|--------------|-------------------------------------------------------------------------------------|--------------|------|---------|
| NRTN         | neurturin                                                                           | A_23_P90359  | -0.9 | 7.7E-04 |
| MMAB         | methylmalonic aciduria (cobalamin deficiency) cblB type                             | A_23_P2537   | -0.9 | 1.6E-05 |
| USP8         | ubiquitin specific peptidase 8                                                      | A_24_P50918  | -0.9 | 1.8E-02 |
| ACAT2        | acetyl-CoA acetyltransferase 2                                                      | A_23_P383835 | -0.9 | 3.9E-05 |
| AGER         | advanced glycosylation end product-specific receptor                                | A_23_P93360  | -0.9 | 5.3E-03 |
| IVD          | isovaleryl-CoA dehydrogenase                                                        | A_23_P129322 | -0.9 | 1.1E-03 |
| ROR1         | receptor tyrosine kinase-like orphan receptor 1                                     | A_23_P12363  | -0.9 | 8.1E-05 |
| SERPINA3     | serpin peptidase inhibitor, clade A (alpha-1 antitrypsin), member 3                 | A_23_P2920   | -0.9 | 4.4E-02 |
| BEX5         | brain expressed, X-linked 5                                                         | A_32_P69849  | -0.9 | 4.2E-03 |
| C10orf47     | chromosome 10 open reading frame 47                                                 | A_24_P389608 | -0.9 | 3.5E-04 |
| SUN2         | Sad1 and UNC84 domain containing 2                                                  | A_32_P194115 | -0.9 | 1.6E-06 |
| TNS1         | tensin 1                                                                            | A_24_P105733 | -0.9 | 4.3E-06 |
| POM121L10P   | POM121 membrane glycoprotein-like 10, pseudogene                                    | A_24_P459963 | -0.9 | 5.2E-03 |
| CD109        | CD109 molecule                                                                      | A_23_P331928 | -0.9 | 2.5E-04 |
| MPO          | myeloperoxidase                                                                     | A_23_P141173 | -0.9 | 1.8E-02 |
| NOL3         | nucleolar protein 3 (apoptosis repressor with CARD domain)                          | A_23_P206371 | -0.9 | 2.8E-08 |
| EGFR         | epidermal growth factor receptor                                                    | A_23_P215790 | -0.9 | 1.9E-06 |
| FOXA2        | forkhead box A2                                                                     | A_24_P365515 | -0.9 | 4.7E-04 |
| PON2         | paraoxonase 2                                                                       | A_23_P31399  | -0.9 | 2.2E-04 |
| MLPH         | melanophilin                                                                        | A_23_P154400 | -0.9 | 1.6E-03 |
| PPP2R2D      | protein phosphatase 2, regulatory subunit B, delta                                  | A_24_P911775 | -0.9 | 2.8E-06 |
| SESTD1       | SEC14 and spectrin domains 1                                                        | A_23_P367610 | -0.9 | 3.3E-07 |
| SIRPD        | signal-regulatory protein delta                                                     | A_32_P74391  | -0.9 | 5.0E-02 |
| TPPP2        | tubulin polymerization-promoting protein family member 2                            | A_23_P117464 | -0.9 | 4.8E-04 |
| TSPAN13      | tetraspanin 13                                                                      | A_23_P168610 | -0.9 | 3.6E-05 |
| SLC11A1      | solute carrier family 11 (proton-coupled divalent metal ion transporters), member 1 | A_24_P76831  | -0.9 | 1.1E-02 |
| CCL23        | chemokine (C-C motif) ligand 23                                                     | A_24_P319088 | -0.9 | 5.5E-03 |
| PICK1        | protein interacting with PRKCA 1                                                    | A_23_P91727  | -0.9 | 1.1E-05 |
| MAP3K6       | mitogen-activated protein kinase kinase kinase 6                                    | A_24_P145653 | -0.9 | 1.7E-05 |
| PTPN21       | protein tyrosine phosphatase, non-receptor type 21                                  | A_24_P255829 | -0.9 | 1.4E-02 |
| LOC100129794 | similar to hCG1804255                                                               | A_32_P84454  | -0.9 | 3.8E-02 |
| DTNA         | dystrobrevin, alpha                                                                 | A_32_P79648  | -0.9 | 1.7E-03 |
| CCND3        | cyclin D3                                                                           | A_23_P361773 | -0.9 | 3.3E-06 |
| PELO         | pelota homolog (Drosophila)                                                         | A_24_P66239  | -0.9 | 6.9E-03 |
| C8orf60      | chromosome 8 open reading frame 60                                                  | A_24_P59387  | -0.9 | 9.4E-05 |
| CCDC38       | coiled-coil domain containing 38                                                    | A_32_P54037  | -0.9 | 2.0E-02 |
| ANGPT1       | angiopoietin 1                                                                      | A_24_P60887  | -0.9 | 1.2E-02 |
| NPNT         | nephronectin                                                                        | A_32_P174978 | -0.9 | 2.5E-03 |

|              |                                                                                                        |              |      |         |
|--------------|--------------------------------------------------------------------------------------------------------|--------------|------|---------|
| TMEM41B      | transmembrane protein 41B                                                                              | A_32_P173058 | -0.9 | 2.0E-06 |
| LOC100272216 | hypothetical LOC100272216                                                                              | A_24_P409904 | -0.9 | 2.0E-03 |
| FADS3        | fatty acid desaturase 3                                                                                | A_23_P64404  | -0.9 | 1.7E-04 |
| PHACTR1      | phosphatase and actin regulator 1                                                                      | A_24_P943566 | -0.9 | 6.2E-03 |
| NANOG        | Nanog homeobox                                                                                         | A_23_P204640 | -0.9 | 1.4E-02 |
| IL16         | interleukin 16 (lymphocyte chemoattractant factor)                                                     | A_24_P299423 | -0.9 | 1.2E-02 |
| EXOC3L1      | exocyst complex component 3-like 1                                                                     | A_23_P424734 | -0.9 | 1.2E-04 |
| DKK2         | dickkopf homolog 2 ( <i>Xenopus laevis</i> )                                                           | A_23_P155848 | -0.9 | 3.1E-02 |
| ARSK         | arylsulfatase family, member K                                                                         | A_23_P312536 | -0.9 | 3.6E-05 |
| GRINL1A      | glutamate receptor, ionotropic, N-methyl D-aspartate-like 1A                                           | A_24_P307714 | -0.9 | 2.3E-02 |
| PPL          | periplakin                                                                                             | A_23_P106906 | -0.9 | 9.8E-05 |
| CXADR        | coxsackie virus and adenovirus receptor                                                                | A_32_P29632  | -0.9 | 1.8E-03 |
| VGLL3        | vestigial like 3 ( <i>Drosophila</i> )                                                                 | A_23_P132763 | -0.9 | 1.9E-03 |
| RAI2         | retinoic acid induced 2                                                                                | A_23_P254165 | -0.9 | 6.8E-05 |
| INADL        | InaD-like ( <i>Drosophila</i> )                                                                        | A_24_P942454 | -0.9 | 3.9E-03 |
| ARAP3        | ArfGAP with RhoGAP domain, ankyrin repeat and PH domain 3                                              | A_23_P167389 | -0.9 | 1.5E-04 |
| TECTA        | tectorin alpha                                                                                         | A_23_P104853 | -0.9 | 1.1E-02 |
| TLR4         | toll-like receptor 4                                                                                   | A_32_P66881  | -0.9 | 1.1E-03 |
| SNX24        | sorting nexin 24                                                                                       | A_23_P19095  | -0.9 | 5.7E-07 |
| IL17RB       | interleukin 17 receptor B                                                                              | A_24_P157370 | -0.9 | 4.0E-03 |
| RAP1GAP      | RAP1 GTPase activating protein                                                                         | A_24_P36890  | -0.9 | 1.0E-02 |
| MLLT4        | myeloid/lymphoid or mixed-lineage leukemia (trithorax homolog, <i>Drosophila</i> ); translocated to, 4 | A_23_P344694 | -0.9 | 7.8E-03 |
| CDKN1C       | cyclin-dependent kinase inhibitor 1C (p57, Kip2)                                                       | A_23_P428129 | -0.9 | 1.3E-03 |
| AJAP1        | adherens junctions associated protein 1                                                                | A_23_P23155  | -0.9 | 7.8E-04 |
| ACSL1        | acyl-CoA synthetase long-chain family member 1                                                         | A_23_P110212 | -0.9 | 1.5E-04 |
| WFDC12       | WAP four-disulfide core domain 12                                                                      | A_23_P68436  | -0.9 | 1.9E-03 |
| LOC445341    | TRAFs and NIK-associated protein                                                                       | A_24_P376070 | -0.9 | 1.3E-02 |
| HIST1H2BD    | histone cluster 1, H2bd                                                                                | A_32_P152348 | -0.9 | 3.6E-04 |
| SYF2         | SYF2 homolog, RNA splicing factor ( <i>S. cerevisiae</i> )                                             | A_24_P920102 | -0.9 | 5.0E-04 |
| SCAND3       | SCAN domain containing 3                                                                               | A_24_P188164 | -0.9 | 6.6E-03 |
| PARD6B       | par-6 partitioning defective 6 homolog beta ( <i>C. elegans</i> )                                      | A_32_P205637 | -0.9 | 4.0E-03 |
| NRN1L        | neuritin 1-like                                                                                        | A_32_P8551   | -0.9 | 1.2E-04 |
| ITGA8        | integrin, alpha 8                                                                                      | A_23_P46781  | -0.9 | 5.9E-04 |
| PARD3        | par-3 partitioning defective 3 homolog ( <i>C. elegans</i> )                                           | A_23_P201963 | -0.9 | 1.4E-04 |
| ADI1         | acireductone dioxygenase 1                                                                             | A_23_P148194 | -0.9 | 5.6E-06 |
| ACR          | acrosin                                                                                                | A_23_P40734  | -0.9 | 1.1E-03 |
| TCEAL4       | transcription elongation factor A (SII)-like 4                                                         | A_23_P259166 | -0.9 | 2.1E-06 |
| BMX          | BMX non-receptor tyrosine kinase                                                                       | A_24_P263144 | -0.9 | 1.9E-02 |
| GBA3         | glucosidase, beta, acid 3 (cytosolic)                                                                  | A_23_P18672  | -0.9 | 6.2E-04 |



|              |                                                                                        |              |      |         |
|--------------|----------------------------------------------------------------------------------------|--------------|------|---------|
| EGFL7        | EGF-like-domain, multiple 7                                                            | A_32_P210642 | -0.9 | 2.9E-03 |
| CDC25B       | cell division cycle 25 homolog B (S. pombe)                                            | A_23_P210726 | -0.9 | 6.4E-07 |
| RBM26        | RNA binding motif protein 26                                                           | A_24_P735073 | -0.9 | 4.4E-03 |
| FLJ30064     | hypothetical protein LOC644975                                                         | A_24_P76512  | -0.9 | 9.1E-03 |
| ERVWE1       | endogenous retroviral family W, env(C7), member 1                                      | A_23_P31443  | -0.9 | 7.0E-03 |
| STARD3       | StAR-related lipid transfer (START) domain containing 3                                | A_24_P224538 | -0.9 | 1.3E-05 |
| LOC100130815 | hypothetical LOC100130815                                                              | A_32_P876086 | -0.9 | 1.3E-02 |
| STARD13      | StAR-related lipid transfer (START) domain containing 13                               | A_24_P210420 | -0.9 | 1.1E-04 |
| RASSF7       | Ras association (RalGDS/AF-6) domain family (N-terminal) member 7                      | A_23_P52589  | -0.9 | 2.8E-05 |
| LOC100272228 | hypothetical LOC100272228                                                              | A_24_P864142 | -0.9 | 3.2E-02 |
| MXD3         | MAX dimerization protein 3                                                             | A_24_P417706 | -0.9 | 2.0E-03 |
| LOC286272    | hypothetical protein LOC286272                                                         | A_24_P483145 | -0.9 | 1.5E-03 |
| FOLR3        | folate receptor 3 (gamma)                                                              | A_24_P252996 | -0.9 | 6.5E-03 |
| ART4         | ADP-ribosyltransferase 4 (Dombrock blood group)                                        | A_23_P116902 | -0.9 | 8.6E-03 |
| ACSS1        | acyl-CoA synthetase short-chain family member 1                                        | A_24_P940831 | -0.9 | 1.4E-02 |
| LOC100128822 | hypothetical LOC100128822                                                              | A_32_P6172   | -0.9 | 7.1E-06 |
| STX3         | syntaxin 3                                                                             | A_23_P139143 | -0.9 | 1.8E-04 |
| PF4          | platelet factor 4                                                                      | A_24_P79403  | -0.9 | 4.7E-02 |
| APOL3        | apolipoprotein L, 3                                                                    | A_23_P29237  | -0.9 | 2.4E-03 |
| AKAP2        | A kinase (PRKA) anchor protein 2                                                       | A_23_P359043 | -0.9 | 2.2E-03 |
| HIST1H4A     | histone cluster 1, H4a                                                                 | A_23_P431179 | -0.9 | 6.1E-04 |
| TMEM14E      | transmembrane protein 14E                                                              | A_24_P932416 | -0.9 | 2.8E-02 |
| MID1IP1      | MID1 interacting protein 1 (gastrulation specific G12 homolog (zebrafish))             | A_23_P125579 | -0.9 | 3.8E-05 |
| ABL1         | c-abl oncogene 1, non-receptor tyrosine kinase                                         | A_24_P282416 | -0.9 | 1.6E-02 |
| PTPLB        | protein tyrosine phosphatase-like (proline instead of catalytic arginine), member b    | A_23_P155197 | -0.9 | 3.9E-07 |
| ULK2         | unc-51-like kinase 2 (C. elegans)                                                      | A_24_P932594 | -0.9 | 2.9E-03 |
| MRPL43       | mitochondrial ribosomal protein L43                                                    | A_23_P382154 | -0.9 | 2.2E-02 |
| PCDH1        | protocadherin 1                                                                        | A_23_P213359 | -0.9 | 5.8E-05 |
| LOC554206    | hypothetical LOC554206                                                                 | A_23_P434040 | -0.9 | 9.9E-05 |
| NIPA1        | non imprinted in Prader-Willi/Angelman syndrome 1                                      | A_23_P382460 | -0.9 | 1.1E-02 |
| MT1A         | metallothionein 1A                                                                     | A_23_P54840  | -0.9 | 1.6E-02 |
| CIT          | citron (rho-interacting, serine/threonine kinase 21)                                   | A_23_P420551 | -0.9 | 1.8E-02 |
| LOC90246     | hypothetical LOC90246                                                                  | A_24_P532180 | -0.9 | 3.3E-05 |
| SEMA3F       | sema domain, immunoglobulin domain (Ig), short basic domain, secreted, (semaphorin) 3F | A_24_P300076 | -0.9 | 3.6E-05 |
| SLC10A4      | solute carrier family 10 (sodium/bile acid cotransporter family), member 4             | A_23_P314811 | -0.9 | 2.0E-02 |
| TMOD1        | tropomodulin 1                                                                         | A_23_P112289 | -0.9 | 1.1E-02 |
| FAH          | fumarylacetoacetate hydrolase (fumarylacetoacetase)                                    | A_23_P129221 | -0.9 | 8.7E-09 |

|              |                                                                                                |              |      |         |
|--------------|------------------------------------------------------------------------------------------------|--------------|------|---------|
| NHEJ1        | nonhomologous end-joining factor 1                                                             | A_24_P251381 | -0.8 | 1.5E-05 |
| CAPN3        | calpain 3, (p94)                                                                               | A_23_P218190 | -0.8 | 5.4E-05 |
| C18orf18     | chromosome 18 open reading frame 18                                                            | A_23_P377965 | -0.8 | 8.6E-03 |
| SPRY4        | sprouty homolog 4 (Drosophila)                                                                 | A_24_P269062 | -0.8 | 1.9E-02 |
| LOC100129406 | hypothetical protein LOC100129406                                                              | A_24_P934135 | -0.8 | 2.1E-03 |
| ATP1A4       | ATPase, Na+/K+ transporting, alpha 4 polypeptide                                               | A_24_P307626 | -0.8 | 1.0E-06 |
| CXorf57      | chromosome X open reading frame 57                                                             | A_23_P96369  | -0.8 | 8.8E-03 |
| ATP1A3       | ATPase, Na+/K+ transporting, alpha 3 polypeptide                                               | A_23_P27472  | -0.8 | 5.1E-07 |
| SLC44A1      | solute carrier family 44, member 1                                                             | A_23_P411806 | -0.8 | 4.5E-05 |
| OBSCN        | obscurin, cytoskeletal calmodulin and titin-interacting RhoGEF                                 | A_23_P63128  | -0.8 | 4.9E-04 |
| KANK3        | KN motif and ankyrin repeat domains 3                                                          | A_23_P131089 | -0.8 | 5.4E-04 |
| FGD5         | FYVE, RhoGEF and PH domain containing 5                                                        | A_23_P321972 | -0.8 | 1.3E-03 |
| LAMA2        | laminin, alpha 2                                                                               | A_23_P70719  | -0.8 | 8.4E-03 |
| ARHGAP24     | Rho GTPase activating protein 24                                                               | A_32_P72067  | -0.8 | 1.2E-02 |
| ELOVL6       | ELOVL family member 6, elongation of long chain fatty acids (FEN1/Elo2, SUR4/Elo3-like, yeast) | A_23_P7361   | -0.8 | 5.5E-04 |
| LOC100507198 | hypothetical LOC100507198                                                                      | A_24_P876734 | -0.8 | 1.4E-03 |
| RACGAP1      | Rac GTPase activating protein 1                                                                | A_32_P186474 | -0.8 | 1.4E-05 |
| PRKAR2B      | protein kinase, cAMP-dependent, regulatory, type II, beta                                      | A_32_P145477 | -0.8 | 1.6E-02 |
| FAM188B      | family with sequence similarity 188, member B                                                  | A_24_P126425 | -0.8 | 1.3E-05 |
| LONRF3       | LON peptidase N-terminal domain and ring finger 3                                              | A_24_P185909 | -0.8 | 3.0E-02 |
| FAM89A       | family with sequence similarity 89, member A                                                   | A_24_P418408 | -0.8 | 1.2E-03 |
| SDCCAG8      | serologically defined colon cancer antigen 8                                                   | A_24_P179489 | -0.8 | 3.4E-05 |
| PABPC5       | poly(A) binding protein, cytoplasmic 5                                                         | A_23_P84047  | -0.8 | 4.5E-02 |
| ACSM5        | acyl-CoA synthetase medium-chain family member 5                                               | A_24_P367776 | -0.8 | 3.0E-02 |
| CYP4B1       | cytochrome P450, family 4, subfamily B, polypeptide 1                                          | A_23_P114713 | -0.8 | 2.4E-02 |
| TTL7         | tubulin tyrosine ligase-like family, member 7                                                  | A_24_P165450 | -0.8 | 8.0E-03 |
| TCTA         | T-cell leukemia translocation altered gene                                                     | A_24_P123166 | -0.8 | 2.1E-06 |
| PPARG        | peroxisome proliferator-activated receptor gamma                                               | A_23_P252062 | -0.8 | 2.5E-02 |
| MACF1        | microtubule-actin crosslinking factor 1                                                        | A_24_P418637 | -0.8 | 1.3E-04 |
| BLVRB        | biliverdin reductase B (flavin reductase (NADPH))                                              | A_23_P153351 | -0.8 | 3.6E-08 |
| ACRBP        | acrosin binding protein                                                                        | A_23_P151120 | -0.8 | 1.1E-03 |
| TMEM26       | transmembrane protein 26                                                                       | A_32_P75264  | -0.8 | 4.7E-02 |
| CDK19        | cyclin-dependent kinase 19                                                                     | A_24_P699896 | -0.8 | 7.1E-04 |
| LOC221814    | hypothetical protein LOC221814                                                                 | A_24_P759861 | -0.8 | 1.6E-02 |
| GPC3         | glypican 3                                                                                     | A_24_P57631  | -0.8 | 8.4E-03 |
| NCRNA00162   | non-protein coding RNA 162                                                                     | A_32_P155460 | -0.8 | 2.2E-05 |
| ZNF23        | zinc finger protein 23 (KOX 16)                                                                | A_24_P935125 | -0.8 | 3.7E-03 |
| CLEC14A      | C-type lectin domain family 14, member A                                                       | A_24_P215653 | -0.8 | 1.1E-02 |
| GAB1         | GRB2-associated binding protein 1                                                              | A_23_P335239 | -0.8 | 3.9E-03 |

|              |                                                                                |              |      |         |
|--------------|--------------------------------------------------------------------------------|--------------|------|---------|
| TOM1L1       | target of myb1 (chicken)-like 1                                                | A_24_P196658 | -0.8 | 4.8E-03 |
| LRRTM2       | leucine rich repeat transmembrane neuronal 2                                   | A_24_P140569 | -0.8 | 2.1E-02 |
| PDE6A        | phosphodiesterase 6A, cGMP-specific, rod, alpha                                | A_23_P81590  | -0.8 | 3.6E-02 |
| CAT          | catalase                                                                       | A_23_P105138 | -0.8 | 1.3E-03 |
| KIAA1109     | KIAA1109                                                                       | A_24_P937135 | -0.8 | 2.6E-03 |
| MYL3         | myosin, light chain 3, alkali; ventricular, skeletal, slow                     | A_24_P131646 | -0.8 | 1.1E-02 |
| LOC283788    | FSDH region gene 1 pseudogene                                                  | A_24_P497437 | -0.8 | 1.9E-02 |
| LOC150622    | hypothetical LOC150622                                                         | A_32_P123279 | -0.8 | 6.0E-03 |
| LNX1         | ligand of numb-protein X 1                                                     | A_24_P54900  | -0.8 | 8.7E-03 |
| TSPAN14      | tetraspanin 14                                                                 | A_24_P98613  | -0.8 | 1.9E-06 |
| POPDC3       | popeye domain containing 3                                                     | A_23_P358597 | -0.8 | 9.1E-03 |
| MBL1P        | mannose-binding lectin (protein A) 1, pseudogene                               | A_24_P169634 | -0.8 | 1.2E-02 |
| NETO2        | neuropilin (NRP) and tolloid (TLL)-like 2                                      | A_32_P77989  | -0.8 | 4.9E-03 |
| GPR4         | G protein-coupled receptor 4                                                   | A_23_P357284 | -0.8 | 8.4E-03 |
| ZNF493       | zinc finger protein 493                                                        | A_24_P282261 | -0.8 | 4.1E-04 |
| PRKD1        | protein kinase D1                                                              | A_23_P106016 | -0.8 | 4.4E-06 |
| PXMP4        | peroxisomal membrane protein 4, 24kDa                                          | A_23_P91430  | -0.8 | 4.5E-05 |
| LOC100132356 | hypothetical LOC100132356                                                      | A_24_P942017 | -0.8 | 4.6E-03 |
| RPL13P5      | ribosomal protein L13 pseudogene 5                                             | A_23_P48080  | -0.8 | 1.7E-05 |
| TFPI         | tissue factor pathway inhibitor (lipoprotein-associated coagulation inhibitor) | A_23_P17095  | -0.8 | 3.2E-05 |
| S100A14      | S100 calcium binding protein A14                                               | A_23_P124619 | -0.8 | 3.2E-03 |
| MFAP3L       | microfibrillar-associated protein 3-like                                       | A_24_P76675  | -0.8 | 5.3E-03 |
| RNF112       | ring finger protein 112                                                        | A_23_P107116 | -0.8 | 3.3E-03 |
| B3GNT1       | UDP-GlcNAc:betaGal beta-1,3-N-acetylglucosaminyltransferase 1                  | A_23_P86900  | -0.8 | 3.8E-05 |
| B3GNT8       | UDP-GlcNAc:betaGal beta-1,3-N-acetylglucosaminyltransferase 8                  | A_23_P101380 | -0.8 | 4.5E-03 |
| MT1H         | metallothionein 1H                                                             | A_23_P414343 | -0.8 | 3.4E-02 |
| FBLN5        | fibulin 5                                                                      | A_23_P151805 | -0.8 | 1.3E-04 |
| FAM189A2     | family with sequence similarity 189, member A2                                 | A_32_P43717  | -0.8 | 3.2E-02 |
| LOC80054     | hypothetical LOC80054                                                          | A_23_P5018   | -0.8 | 6.1E-04 |
| PPEF1        | protein phosphatase, EF-hand calcium binding domain 1                          | A_23_P125505 | -0.8 | 1.6E-02 |
| CNTROB       | centrobin, centrosomal BRCA2 interacting protein                               | A_23_P9761   | -0.8 | 1.5E-07 |
| SPIN4        | spindlin family, member 4                                                      | A_24_P467371 | -0.8 | 4.3E-03 |
| TMEM87A      | transmembrane protein 87A                                                      | A_24_P65098  | -0.8 | 5.4E-03 |
| PDLIM2       | PDZ and LIM domain 2 (mystique)                                                | A_24_P160380 | -0.8 | 2.2E-02 |
| LOC100129648 | hypothetical LOC100129648                                                      | A_24_P76604  | -0.8 | 4.7E-02 |
| MERTK        | c-mer proto-oncogene tyrosine kinase                                           | A_23_P32955  | -0.8 | 1.3E-04 |
| TGFBR2       | transforming growth factor, beta receptor II (70/80kDa)                        | A_23_P337242 | -0.8 | 9.4E-06 |
| PLA2G16      | phospholipase A2, group XVI                                                    | A_23_P116414 | -0.8 | 7.6E-06 |
| IZUMO4       | IZUMO family member 4                                                          | A_23_P50674  | -0.8 | 4.5E-04 |

|              |                                                                           |              |      |         |
|--------------|---------------------------------------------------------------------------|--------------|------|---------|
| OR2A9P       | olfactory receptor, family 2, subfamily A, member 9 pseudogene            | A_23_P123172 | -0.8 | 2.0E-02 |
| KRT72        | keratin 72                                                                | A_32_P48825  | -0.8 | 1.5E-02 |
| TSPYL2       | TSPY-like 2                                                               | A_23_P170608 | -0.8 | 1.9E-02 |
| EFNB2        | ephrin-B2                                                                 | A_23_P428139 | -0.8 | 3.0E-03 |
| UNC13D       | unc-13 homolog D (C. elegans)                                             | A_24_P53215  | -0.8 | 1.3E-04 |
| ATP1A1       | ATPase, Na <sup>+</sup> /K <sup>+</sup> transporting, alpha 1 polypeptide | A_23_P1072   | -0.8 | 2.2E-07 |
| F10          | coagulation factor X                                                      | A_23_P205177 | -0.8 | 7.0E-05 |
| TBXAS1       | thromboxane A synthase 1 (platelet)                                       | A_24_P274814 | -0.8 | 6.3E-04 |
| NEXN         | nexilin (F actin binding protein)                                         | A_24_P409971 | -0.8 | 1.4E-03 |
| USP54        | ubiquitin specific peptidase 54                                           | A_23_P355536 | -0.8 | 2.2E-05 |
| DGAT2        | diacylglycerol O-acyltransferase 2                                        | A_23_P53198  | -0.8 | 3.5E-03 |
| SESN1        | sestrin 1                                                                 | A_24_P346339 | -0.8 | 1.6E-03 |
| CCDC141      | coiled-coil domain containing 141                                         | A_23_P427696 | -0.8 | 1.9E-04 |
| LOC100131541 | hypothetical LOC100131541                                                 | A_24_P935682 | -0.8 | 4.1E-02 |
| CBFA2T3      | core-binding factor, runt domain, alpha subunit 2; translocated to, 3     | A_23_P500741 | -0.8 | 3.0E-04 |
| EPHB4        | EPH receptor B4                                                           | A_23_P168443 | -0.8 | 5.6E-06 |
| ROBO4        | roundabout homolog 4, magic roundabout (Drosophila)                       | A_23_P104881 | -0.8 | 2.2E-03 |
| RETSAT       | retinol saturase (all-trans-retinol 13,14-reductase)                      | A_23_P209944 | -0.8 | 4.9E-05 |
| CDKL1        | cyclin-dependent kinase-like 1 (CDC2-related kinase)                      | A_23_P99747  | -0.8 | 2.2E-04 |
| MST1         | macrophage stimulating 1 (hepatocyte growth factor-like)                  | A_24_P148796 | -0.8 | 3.7E-03 |
| SRGAP2P1     | SLIT-ROBO Rho GTPase activating protein 2 pseudogene 1                    | A_32_P198412 | -0.8 | 4.1E-05 |
| UGT2B10      | UDP glucuronosyltransferase 2 family, polypeptide B10                     | A_24_P521559 | -0.8 | 3.5E-02 |
| C3orf71      | chromosome 3 open reading frame 71                                        | A_24_P76018  | -0.8 | 3.1E-03 |
| RIN2         | Ras and Rab interactor 2                                                  | A_24_P305570 | -0.8 | 7.3E-05 |
| FAM177A1     | family with sequence similarity 177, member A1                            | A_23_P2935   | -0.8 | 2.8E-04 |
| HTT          | huntingtin                                                                | A_23_P212749 | -0.8 | 2.4E-06 |
| LMO7         | LIM domain 7                                                              | A_23_P205159 | -0.8 | 4.7E-03 |
| TCEAL2       | transcription elongation factor A (SII)-like 2                            | A_23_P85140  | -0.8 | 5.6E-03 |
| LOC220729    | succinate dehydrogenase complex, subunit A, flavoprotein pseudogene       | A_24_P489480 | -0.8 | 4.7E-03 |
| MPPE1        | metallophosphoesterase 1                                                  | A_24_P390833 | -0.8 | 3.2E-03 |
| LIMS2        | LIM and senescent cell antigen-like domains 2                             | A_23_P142796 | -0.8 | 3.5E-05 |
| EZH1         | enhancer of zeste homolog 1 (Drosophila)                                  | A_23_P428219 | -0.8 | 5.5E-06 |
| DIAPH3       | diaphanous homolog 3 (Drosophila)                                         | A_32_P150891 | -0.8 | 3.4E-02 |
| BFAR         | bifunctional apoptosis regulator                                          | A_24_P184931 | -0.8 | 3.3E-05 |
| NTRK3        | neurotrophic tyrosine kinase, receptor, type 3                            | A_23_P205900 | -0.8 | 3.5E-04 |
| LOC374890    | hypothetical LOC374890                                                    | A_32_P469390 | -0.8 | 3.3E-04 |
| C6orf81      | chromosome 6 open reading frame 81                                        | A_32_P146113 | -0.8 | 3.4E-02 |
| KLF9         | Kruppel-like factor 9                                                     | A_23_P415401 | -0.8 | 1.7E-02 |

|              |                                                                                        |              |      |         |
|--------------|----------------------------------------------------------------------------------------|--------------|------|---------|
| NAA15        | N(alpha)-acetyltransferase 15, NatA auxiliary subunit                                  | A_32_P118220 | -0.8 | 3.4E-02 |
| SH2D4A       | SH2 domain containing 4A                                                               | A_23_P169003 | -0.8 | 3.3E-03 |
| CPAMD8       | C3 and PZP-like, alpha-2-macroglobulin domain containing 8                             | A_23_P67198  | -0.8 | 3.5E-03 |
| NKX2-1       | NK2 homeobox 1                                                                         | A_24_P184692 | -0.8 | 6.6E-04 |
| DEFA6        | defensin, alpha 6, Paneth cell-specific                                                | A_24_P363711 | -0.8 | 2.0E-02 |
| XRCC6BP1     | XRCC6 binding protein 1                                                                | A_24_P927404 | -0.8 | 5.2E-03 |
| PRDX6        | peroxiredoxin 6                                                                        | A_23_P983    | -0.8 | 3.5E-11 |
| PLXNA2       | plexin A2                                                                              | A_23_P307544 | -0.8 | 1.7E-02 |
| GUSBP1       | glucuronidase, beta pseudogene 1                                                       | A_32_P209735 | -0.8 | 5.0E-03 |
| IL6ST        | interleukin 6 signal transducer (gp130, oncostatin M receptor)                         | A_24_P935033 | -0.8 | 3.0E-02 |
| ALCAM        | activated leukocyte cell adhesion molecule                                             | A_23_P41227  | -0.8 | 1.5E-04 |
| TALDO1       | transaldolase 1                                                                        | A_24_P81740  | -0.8 | 5.9E-08 |
| ACAT1        | acetyl-CoA acetyltransferase 1                                                         | A_23_P24515  | -0.8 | 1.9E-09 |
| ARHGAP10     | Rho GTPase activating protein 10                                                       | A_23_P21548  | -0.8 | 3.5E-06 |
| LUZP3P       | leucine zipper protein 3, pseudogene                                                   | A_23_P254061 | -0.8 | 1.2E-02 |
| NEK3         | NIMA (never in mitosis gene a)-related kinase 3                                        | A_23_P333705 | -0.8 | 8.1E-05 |
| TTC39A       | tetratricopeptide repeat domain 39A                                                    | A_23_P160214 | -0.8 | 9.3E-03 |
| XKR6         | XK, Kell blood group complex subunit-related family, member 6                          | A_23_P387000 | -0.8 | 1.3E-02 |
| CPNE2        | copine II                                                                              | A_23_P37988  | -0.8 | 1.1E-07 |
| FASTKD1      | FAST kinase domains 1                                                                  | A_23_P307624 | -0.8 | 1.2E-02 |
| TJP2         | tight junction protein 2 (zona occludens 2)                                            | A_24_P201153 | -0.8 | 5.1E-04 |
| QDPR         | quinoid dihydropteridine reductase                                                     | A_23_P167212 | -0.8 | 1.2E-05 |
| PEX13        | peroxisomal biogenesis factor 13                                                       | A_24_P927639 | -0.8 | 2.0E-02 |
| NIPAL3       | NIPA-like domain containing 3                                                          | A_24_P919419 | -0.8 | 4.3E-03 |
| LYPD5        | LY6/PLAUR domain containing 5                                                          | A_24_P323148 | -0.8 | 2.4E-02 |
| TPST2        | tyrosylprotein sulfotransferase 2                                                      | A_23_P132226 | -0.8 | 1.2E-05 |
| ARHGAP44     | Rho GTPase activating protein 44                                                       | A_24_P942385 | -0.8 | 1.4E-02 |
| GIF          | gastric intrinsic factor (vitamin B synthesis)                                         | A_23_P52974  | -0.8 | 9.7E-04 |
| MYO9A        | myosin IXA                                                                             | A_23_P205841 | -0.8 | 4.0E-07 |
| MFGE8        | milk fat globule-EGF factor 8 protein                                                  | A_23_P48951  | -0.8 | 5.7E-04 |
| TMEM37       | transmembrane protein 37                                                               | A_23_P67799  | -0.8 | 1.7E-03 |
| KIAA0485     | hypothetical LOC57235                                                                  | A_24_P762886 | -0.8 | 3.2E-02 |
| ALOX5AP      | arachidonate 5-lipoxygenase-activating protein                                         | A_23_P2793   | -0.8 | 1.9E-02 |
| GSTM4        | glutathione S-transferase mu 4                                                         | A_23_P217917 | -0.8 | 6.7E-04 |
| HSD17B4      | hydroxysteroid (17-beta) dehydrogenase 4                                               | A_23_P92954  | -0.8 | 7.6E-08 |
| TAOK2        | TAO kinase 2                                                                           | A_23_P308673 | -0.8 | 5.4E-05 |
| TXNIP        | thioredoxin interacting protein                                                        | A_24_P662813 | -0.8 | 3.9E-02 |
| SEMA3B       | sema domain, immunoglobulin domain (Ig), short basic domain, secreted, (semaphorin) 3B | A_23_P132718 | -0.8 | 1.8E-04 |
| LOC100128893 | hypothetical LOC100128893                                                              | A_32_P125832 | -0.8 | 4.7E-03 |

|              |                                                                                           |              |      |         |
|--------------|-------------------------------------------------------------------------------------------|--------------|------|---------|
| GLT1D1       | glycosyltransferase 1 domain containing 1                                                 | A_32_P19294  | -0.8 | 3.8E-02 |
| TNS3         | tensin 3                                                                                  | A_24_P346431 | -0.8 | 2.0E-04 |
| ACSS2        | acyl-CoA synthetase short-chain family member 2                                           | A_24_P156295 | -0.8 | 4.6E-04 |
| OPN3         | opsin 3                                                                                   | A_23_P74391  | -0.8 | 8.2E-03 |
| ZNF718       | zinc finger protein 718                                                                   | A_23_P124438 | -0.8 | 1.3E-02 |
| RILP         | Rab interacting lysosomal protein                                                         | A_23_P26815  | -0.8 | 3.2E-06 |
| CYP51A1      | cytochrome P450, family 51, subfamily A, polypeptide 1                                    | A_23_P257716 | -0.8 | 3.3E-03 |
| MYST4        | MYST histone acetyltransferase (monocytic leukemia) 4                                     | A_23_P388855 | -0.8 | 2.0E-03 |
| FAM63A       | family with sequence similarity 63, member A                                              | A_23_P149171 | -0.8 | 1.7E-02 |
| ITGA2B       | integrin, alpha 2b (platelet glycoprotein IIb of IIb/IIIa complex, antigen CD41)          | A_23_P77971  | -0.8 | 1.2E-03 |
| SLC44A2      | solute carrier family 44, member 2                                                        | A_24_P10657  | -0.8 | 3.6E-06 |
| DBT          | dihydrolipoamide branched chain transacylase E2                                           | A_23_P74022  | -0.8 | 1.1E-02 |
| SHANK2       | SH3 and multiple ankyrin repeat domains 2                                                 | A_23_P334883 | -0.8 | 6.4E-03 |
| GJA4         | gap junction protein, alpha 4, 37kDa                                                      | A_23_P1083   | -0.7 | 1.3E-02 |
| AXIN2        | axin 2                                                                                    | A_23_P148015 | -0.7 | 9.8E-04 |
| FAM69B       | family with sequence similarity 69, member B                                              | A_23_P431305 | -0.7 | 4.6E-03 |
| MEIS1        | Meis homeobox 1                                                                           | A_32_P98914  | -0.7 | 7.8E-03 |
| LOC150166    | hypothetical protein LOC150166                                                            | A_32_P103815 | -0.7 | 4.4E-03 |
| IMPA2        | inositol(myo)-1(or 4)-monophosphatase 2                                                   | A_23_P50081  | -0.7 | 2.0E-04 |
| PPP2R5A      | protein phosphatase 2, regulatory subunit B', alpha                                       | A_24_P134955 | -0.7 | 8.5E-06 |
| LOC100505679 | hypothetical protein LOC100505679                                                         | A_24_P555170 | -0.7 | 4.2E-02 |
| RAD18        | RAD18 homolog ( <i>S. cerevisiae</i> )                                                    | A_24_P882345 | -0.7 | 1.6E-02 |
| LASS2        | LAG1 homolog, ceramide synthase 2                                                         | A_23_P63010  | -0.7 | 1.6E-06 |
| SNRK         | SNF related kinase                                                                        | A_24_P102151 | -0.7 | 2.4E-02 |
| SH3GL3       | SH3-domain GRB2-like 3                                                                    | A_23_P48988  | -0.7 | 3.9E-03 |
| LOC389634    | hypothetical LOC389634                                                                    | A_32_P221305 | -0.7 | 2.4E-02 |
| CYP2B7P1     | cytochrome P450, family 2, subfamily B, polypeptide 7 pseudogene 1                        | A_23_P121914 | -0.7 | 2.1E-02 |
| ACCS         | 1-aminocyclopropane-1-carboxylate synthase homolog ( <i>Arabidopsis</i> )(non-functional) | A_23_P24586  | -0.7 | 9.8E-05 |
| MFNG         | MFNG O-fucosylpeptide 3-beta-N-acetylglucosaminyltransferase                              | A_24_P224926 | -0.7 | 2.3E-05 |
| BCAT2        | branched chain amino-acid transaminase 2, mitochondrial                                   | A_23_P101551 | -0.7 | 7.4E-10 |
| EHD2         | EH-domain containing 2                                                                    | A_24_P156113 | -0.7 | 3.6E-05 |
| SERINC3      | serine incorporator 3                                                                     | A_23_P435501 | -0.7 | 1.1E-04 |
| CTDSPL       | CTD (carboxy-terminal domain, RNA polymerase II, polypeptide A) small phosphatase-like    | A_23_P212436 | -0.7 | 3.6E-04 |
| CYP2R1       | cytochrome P450, family 2, subfamily R, polypeptide 1                                     | A_23_P335190 | -0.7 | 7.4E-07 |
| FSTL3        | follistatin-like 3 (secreted glycoprotein)                                                | A_23_P209167 | -0.7 | 1.0E-02 |
| C21orf30     | chromosome 21 open reading frame 30                                                       | A_24_P221903 | -0.7 | 7.1E-03 |
| RAPGEF2      | Rap guanine nucleotide exchange factor (GEF) 2                                            | A_24_P935919 | -0.7 | 3.8E-02 |

|              |                                                                                  |              |      |         |
|--------------|----------------------------------------------------------------------------------|--------------|------|---------|
| ZHX3         | zinc fingers and homeoboxes 3                                                    | A_24_P57700  | -0.7 | 5.9E-05 |
| NEDD9        | neural precursor cell expressed, developmentally down-regulated 9                | A_23_P344555 | -0.7 | 7.8E-03 |
| JUB          | jub, ajuba homolog ( <i>Xenopus laevis</i> )                                     | A_23_P54055  | -0.7 | 8.3E-03 |
| OR511        | olfactory receptor, family 5, subfamily I, member 1                              | A_23_P150467 | -0.7 | 6.0E-03 |
| CLSTN2       | calsyntenin 2                                                                    | A_23_P212608 | -0.7 | 1.6E-02 |
| SAP30        | Sin3A-associated protein, 30kDa                                                  | A_23_P121602 | -0.7 | 1.9E-03 |
| GALK1        | galactokinase 1                                                                  | A_23_P141126 | -0.7 | 2.3E-08 |
| DAAM2        | dishevelled associated activator of morphogenesis 2                              | A_32_P52785  | -0.7 | 4.6E-04 |
| TCEANC       | transcription elongation factor A (SII) N-terminal and central domain containing | A_24_P196469 | -0.7 | 3.7E-02 |
| LOC100289058 | hypothetical protein LOC100289058                                                | A_24_P316414 | -0.7 | 1.1E-02 |
| MMP28        | matrix metalloproteinase 28                                                      | A_23_P26890  | -0.7 | 9.1E-03 |
| C7orf25      | chromosome 7 open reading frame 25                                               | A_24_P300483 | -0.7 | 1.5E-04 |
| NUPL1        | nucleoporin like 1                                                               | A_23_P204891 | -0.7 | 7.8E-03 |
| POPDC2       | popeye domain containing 2                                                       | A_24_P257336 | -0.7 | 4.2E-02 |
| ABCA10       | ATP-binding cassette, sub-family A (ABC1), member 10                             | A_23_P89422  | -0.7 | 2.6E-02 |
| SHC3         | SHC (Src homology 2 domain containing) transforming protein 3                    | A_23_P61406  | -0.7 | 2.0E-02 |
| DOCK6        | dedicator of cytokinesis 6                                                       | A_23_P67299  | -0.7 | 3.8E-03 |
| CDH5         | cadherin 5, type 2 (vascular endothelium)                                        | A_23_P129496 | -0.7 | 2.0E-03 |
| GPR126       | G protein-coupled receptor 126                                                   | A_24_P942945 | -0.7 | 2.2E-03 |
| GRK5         | G protein-coupled receptor kinase 5                                              | A_23_P12884  | -0.7 | 1.3E-03 |
| C14orf1      | chromosome 14 open reading frame 1                                               | A_24_P313180 | -0.7 | 9.6E-04 |
| RAPH1        | Ras association (RalGDS/AF-6) and pleckstrin homology domains 1                  | A_24_P924862 | -0.7 | 2.4E-04 |
| ADRB2        | adrenergic, beta-2-, receptor, surface                                           | A_23_P145024 | -0.7 | 3.2E-04 |
| C12orf49     | chromosome 12 open reading frame 49                                              | A_23_P13797  | -0.7 | 5.5E-04 |
| LYSMD4       | LysM, putative peptidoglycan-binding, domain containing 4                        | A_32_P117812 | -0.7 | 4.6E-03 |
| LOC100294145 | hypothetical LOC100294145                                                        | A_32_P97739  | -0.7 | 3.6E-03 |
| ZBTB8A       | zinc finger and BTB domain containing 8A                                         | A_32_P108436 | -0.7 | 6.7E-04 |
| RASL10B      | RAS-like, family 10, member B                                                    | A_24_P322229 | -0.7 | 4.2E-03 |
| UPK3B        | uroplakin 3B                                                                     | A_24_P112160 | -0.7 | 3.8E-04 |
| ACPP         | acid phosphatase, prostate                                                       | A_24_P37589  | -0.7 | 4.8E-02 |
| ANG          | angiogenin, ribonuclease, RNase A family, 5                                      | A_23_P428738 | -0.7 | 2.9E-04 |
| ACYP1        | acylphosphatase 1, erythrocyte (common) type                                     | A_23_P163143 | -0.7 | 3.5E-03 |
| CES1         | carboxylesterase 1                                                               | A_23_P206733 | -0.7 | 1.5E-02 |
| CFLAR        | CASP8 and FADD-like apoptosis regulator                                          | A_23_P209394 | -0.7 | 7.3E-03 |
| FNDC9        | fibronectin type III domain containing 9                                         | A_23_P306489 | -0.7 | 6.0E-05 |
| FADS1        | fatty acid desaturase 1                                                          | A_24_P192994 | -0.7 | 4.1E-04 |
| C20orf46     | chromosome 20 open reading frame 46                                              | A_23_P120504 | -0.7 | 6.8E-03 |
| EPHB6        | EPH receptor B6                                                                  | A_23_P145935 | -0.7 | 3.1E-04 |
| HBS1L        | HBS1-like ( <i>S. cerevisiae</i> )                                               | A_24_P29594  | -0.7 | 3.3E-02 |

|              |                                                                                 |              |      |         |
|--------------|---------------------------------------------------------------------------------|--------------|------|---------|
| SNTB1        | syntrophin, beta 1 (dystrophin-associated protein A1, 59kDa, basic component 1) | A_23_P386030 | -0.7 | 4.4E-02 |
| LOC494150    | prohibitin pseudogene                                                           | A_24_P325006 | -0.7 | 6.2E-04 |
| C14orf147    | chromosome 14 open reading frame 147                                            | A_23_P311150 | -0.7 | 1.9E-05 |
| IL15RA       | interleukin 15 receptor, alpha                                                  | A_23_P138680 | -0.7 | 9.7E-04 |
| ARMC9        | armadillo repeat containing 9                                                   | A_23_P209735 | -0.7 | 1.3E-02 |
| MYO1C        | myosin IC                                                                       | A_23_P416656 | -0.7 | 1.0E-04 |
| NAGS         | N-acetylglutamate synthase                                                      | A_23_P406187 | -0.7 | 1.2E-03 |
| DNAH17       | dynein, axonemal, heavy chain 17                                                | A_24_P940615 | -0.7 | 5.9E-03 |
| DAPK1        | death-associated protein kinase 1                                               | A_23_P252163 | -0.7 | 1.9E-03 |
| CEACAM19     | carcinoembryonic antigen-related cell adhesion molecule 19                      | A_23_P78518  | -0.7 | 2.2E-02 |
| CEACAM21     | carcinoembryonic antigen-related cell adhesion molecule 21                      | A_23_P78595  | -0.7 | 2.8E-02 |
| FDPS         | farnesyl diphosphate synthase                                                   | A_24_P114183 | -0.7 | 3.9E-07 |
| CTNND1       | catenin (cadherin-associated protein), delta 1                                  | A_24_P881527 | -0.7 | 8.8E-03 |
| VAMP5        | vesicle-associated membrane protein 5 (myobrevin)                               | A_23_P39840  | -0.7 | 6.8E-04 |
| PID1         | phosphotyrosine interaction domain containing 1                                 | A_23_P21485  | -0.7 | 2.1E-03 |
| TSPAN12      | tetraspanin 12                                                                  | A_23_P145984 | -0.7 | 2.2E-02 |
| CRK          | v-crk sarcoma virus CT10 oncogene homolog (avian)                               | A_24_P270814 | -0.7 | 9.6E-04 |
| CD163        | CD163 molecule                                                                  | A_23_P33723  | -0.7 | 4.7E-02 |
| SLC31A2      | solute carrier family 31 (copper transporters), member 2                        | A_23_P217109 | -0.7 | 3.2E-02 |
| MAP4K2       | mitogen-activated protein kinase kinase kinase 2                                | A_24_P287075 | -0.7 | 4.5E-05 |
| ABCC6        | ATP-binding cassette, sub-family C (CFTR/MRP), member 6                         | A_23_P100539 | -0.7 | 5.4E-04 |
| EVPLL        | envoplakin-like                                                                 | A_32_P141682 | -0.7 | 1.1E-02 |
| RUNX1T1      | runt-related transcription factor 1; translocated to, 1 (cyclin D-related)      | A_23_P216307 | -0.7 | 5.0E-02 |
| MOSC2        | MOCO sulphurase C-terminal domain containing 2                                  | A_23_P200685 | -0.7 | 1.7E-06 |
| SOX1         | SRY (sex determining region Y)-box 1                                            | A_23_P434416 | -0.7 | 9.1E-03 |
| DOK4         | docking protein 4                                                               | A_24_P48069  | -0.7 | 1.9E-02 |
| SLC35E3      | solute carrier family 35, member E3                                             | A_23_P159110 | -0.7 | 2.4E-04 |
| GLCCI1       | glucocorticoid induced transcript 1                                             | A_23_P82402  | -0.7 | 5.3E-03 |
| OSGIN1       | oxidative stress induced growth inhibitor 1                                     | A_23_P77415  | -0.7 | 1.1E-04 |
| BMPR2        | bone morphogenetic protein receptor, type II (serine/threonine kinase)          | A_24_P753161 | -0.7 | 7.6E-03 |
| BRI3         | brain protein I3                                                                | A_23_P122915 | -0.7 | 6.8E-04 |
| PPP1R3E      | protein phosphatase 1, regulatory (inhibitor) subunit 3E                        | A_23_P428640 | -0.7 | 5.0E-05 |
| GBA2         | glucosidase, beta (bile acid) 2                                                 | A_24_P341187 | -0.7 | 1.7E-04 |
| LOC100526820 | hypothetical LOC100526820                                                       | A_32_P151133 | -0.7 | 1.8E-04 |
| PTPRR        | protein tyrosine phosphatase, receptor type, R                                  | A_23_P47924  | -0.7 | 4.2E-02 |
| EML1         | echinoderm microtubule associated protein like 1                                | A_23_P205746 | -0.7 | 6.0E-04 |
| KIDINS220    | kinase D-interacting substrate, 220kDa                                          | A_24_P7202   | -0.7 | 1.5E-02 |



|            |                                                                                                                        |              |      |         |
|------------|------------------------------------------------------------------------------------------------------------------------|--------------|------|---------|
| AKR1C1     | aldo-keto reductase family 1, member C1 (dihydrodiol dehydrogenase 1; 20-alpha (3-alpha)-hydroxysteroid dehydrogenase) | A_24_P220947 | -0.7 | 3.2E-02 |
| MTRR       | 5-methyltetrahydrofolate-homocysteine methyltransferase reductase                                                      | A_23_P252211 | -0.7 | 1.5E-02 |
| SMAD7      | SMAD family member 7                                                                                                   | A_23_P55518  | -0.7 | 5.1E-04 |
| C5orf56    | chromosome 5 open reading frame 56                                                                                     | A_24_P829156 | -0.7 | 1.6E-02 |
| CARD6      | caspase recruitment domain family, member 6                                                                            | A_23_P41854  | -0.7 | 2.5E-05 |
| TM7SF2     | transmembrane 7 superfamily member 2                                                                                   | A_23_P116037 | -0.7 | 1.4E-04 |
| KIAA1543   | KIAA1543                                                                                                               | A_23_P394043 | -0.7 | 1.4E-06 |
| CDC42BPA   | CDC42 binding protein kinase alpha (DMPK-like)                                                                         | A_23_P51394  | -0.7 | 2.9E-02 |
| KIF1C      | kinesin family member 1C                                                                                               | A_23_P107369 | -0.7 | 6.1E-07 |
| SULT1C4    | sulfotransferase family, cytosolic, 1C, member 4                                                                       | A_23_P39605  | -0.7 | 2.0E-03 |
| KCNJ8      | potassium inwardly-rectifying channel, subfamily J, member 8                                                           | A_23_P64879  | -0.7 | 2.4E-03 |
| AFMID      | arylformamidase                                                                                                        | A_24_P867342 | -0.7 | 3.8E-03 |
| FHOD1      | formin homology 2 domain containing 1                                                                                  | A_23_P37778  | -0.7 | 4.9E-06 |
| LRCH2      | leucine-rich repeats and calponin homology (CH) domain containing 2                                                    | A_23_P73809  | -0.7 | 1.7E-03 |
| GNA11      | guanine nucleotide binding protein (G protein), alpha 11 (Gq class)                                                    | A_24_P927886 | -0.7 | 6.9E-06 |
| C1orf198   | chromosome 1 open reading frame 198                                                                                    | A_32_P42574  | -0.7 | 6.0E-04 |
| ZXDC       | ZXD family zinc finger C                                                                                               | A_23_P303317 | -0.7 | 1.6E-06 |
| ICAM2      | intercellular adhesion molecule 2                                                                                      | A_23_P152655 | -0.7 | 3.2E-03 |
| DHCR24     | 24-dehydrocholesterol reductase                                                                                        | A_23_P217820 | -0.7 | 7.4E-04 |
| LGI4       | leucine-rich repeat LGI family, member 4                                                                               | A_24_P310256 | -0.7 | 2.5E-03 |
| CYBRD1     | cytochrome b reductase 1                                                                                               | A_23_P209564 | -0.7 | 2.3E-03 |
| TECPR1     | tectonin beta-propeller repeat containing 1                                                                            | A_32_P194072 | -0.7 | 5.9E-06 |
| SNX27      | sorting nexin family member 27                                                                                         | A_23_P201238 | -0.7 | 9.4E-06 |
| LPCAT3     | lysophosphatidylcholine acyltransferase 3                                                                              | A_23_P64938  | -0.7 | 7.8E-03 |
| CLIC2      | chloride intracellular channel 2                                                                                       | A_23_P45456  | -0.7 | 7.9E-03 |
| NOVA2      | neuro-oncological ventral antigen 2                                                                                    | A_23_P377717 | -0.7 | 2.4E-04 |
| ANKFY1     | ankyrin repeat and FYVE domain containing 1                                                                            | A_24_P151834 | -0.7 | 2.7E-02 |
| ST6GALNAC5 | ST6 (alpha-N-acetyl-neuraminy-2,3-beta-galactosyl-1,3)-N-acetylgalactosaminide alpha-2,6-sialyltransferase 5           | A_23_P33093  | -0.7 | 3.7E-03 |
| ANKRD2     | ankyrin repeat domain 2 (stretch responsive muscle)                                                                    | A_23_P104555 | -0.7 | 4.3E-05 |
| LRR36      | leucine rich repeat containing 36                                                                                      | A_23_P118042 | -0.7 | 4.0E-02 |
| CDKN2D     | cyclin-dependent kinase inhibitor 2D (p19, inhibits CDK4)                                                              | A_23_P89941  | -0.7 | 2.2E-05 |
| FGGY       | FGGY carbohydrate kinase domain containing                                                                             | A_23_P22169  | -0.7 | 2.0E-03 |
| CCDC84     | coiled-coil domain containing 84                                                                                       | A_24_P636332 | -0.7 | 9.5E-04 |
| C12orf34   | chromosome 12 open reading frame 34                                                                                    | A_23_P128375 | -0.7 | 1.3E-03 |
| CRIPAK     | cysteine-rich PAK1 inhibitor                                                                                           | A_23_P431330 | -0.7 | 2.3E-04 |
| PKN3       | protein kinase N3                                                                                                      | A_23_P258982 | -0.7 | 2.4E-05 |

|               |                                                                                                   |              |      |         |
|---------------|---------------------------------------------------------------------------------------------------|--------------|------|---------|
| DKFZp779M0652 | hypothetical DKFZp779M0652                                                                        | A_32_P189790 | -0.7 | 5.6E-03 |
| RIMS4         | regulating synaptic membrane exocytosis 4                                                         | A_32_P38645  | -0.7 | 1.7E-04 |
| MTSS1         | metastasis suppressor 1                                                                           | A_23_P347632 | -0.7 | 1.8E-04 |
| LSAMP         | limbic system-associated membrane protein                                                         | A_23_P301855 | -0.7 | 3.9E-02 |
| ZNF577        | zinc finger protein 577                                                                           | A_23_P309207 | -0.7 | 5.0E-03 |
| ARHGAP28      | Rho GTPase activating protein 28                                                                  | A_24_P579356 | -0.7 | 4.3E-02 |
| RICTOR        | RPTOR independent companion of MTOR, complex 2                                                    | A_32_P15017  | -0.7 | 6.8E-03 |
| KANK2         | KN motif and ankyrin repeat domains 2                                                             | A_24_P324787 | -0.7 | 4.7E-02 |
| PLIN2         | perilipin 2                                                                                       | A_23_P134953 | -0.7 | 4.4E-02 |
| ATP8A2        | ATPase, aminophospholipid transporter, class I, type 8A, member 2                                 | A_23_P258612 | -0.7 | 3.1E-02 |
| MAGI1         | membrane associated guanylate kinase, WW and PDZ domain containing 1                              | A_23_P73297  | -0.7 | 1.6E-02 |
| PGD           | phosphogluconate dehydrogenase                                                                    | A_23_P126623 | -0.7 | 6.8E-04 |
| C7orf62       | chromosome 7 open reading frame 62                                                                | A_23_P42855  | -0.7 | 3.2E-02 |
| LOC148189     | hypothetical LOC148189                                                                            | A_24_P913216 | -0.7 | 3.6E-02 |
| BEND7         | BEN domain containing 7                                                                           | A_23_P312358 | -0.7 | 6.9E-03 |
| NOTCH2NL      | notch 2 N-terminal like                                                                           | A_24_P401916 | -0.7 | 4.5E-02 |
| VEGFA         | vascular endothelial growth factor A                                                              | A_23_P70398  | -0.7 | 3.2E-02 |
| PHYHD1        | phytanoyl-CoA dioxygenase domain containing 1                                                     | A_23_P307844 | -0.7 | 6.7E-05 |
| FDPSL2A       | MGC44478                                                                                          | A_32_P95223  | -0.7 | 3.4E-06 |
| TIGD6         | tigger transposable element derived 6                                                             | A_24_P337419 | -0.7 | 4.1E-02 |
| SLC26A2       | solute carrier family 26 (sulfate transporter), member 2                                          | A_23_P250951 | -0.7 | 2.9E-03 |
| ENOSF1        | enolase superfamily member 1                                                                      | A_23_P15906  | -0.7 | 2.4E-04 |
| FXVD6         | FXVD domain containing ion transport regulator 6                                                  | A_23_P150394 | -0.7 | 3.0E-03 |
| P2RY12        | purinergic receptor P2Y, G-protein coupled, 12                                                    | A_23_P143902 | -0.7 | 1.6E-02 |
| IL17RE        | interleukin 17 receptor E                                                                         | A_23_P500206 | -0.7 | 5.8E-05 |
| XK            | X-linked Kx blood group (McLeod syndrome)                                                         | A_23_P45304  | -0.7 | 1.0E-02 |
| SH3D19        | SH3 domain containing 19                                                                          | A_23_P33364  | -0.7 | 1.2E-03 |
| ZNF620        | zinc finger protein 620                                                                           | A_32_P308779 | -0.7 | 3.1E-02 |
| TKT           | transketolase                                                                                     | A_23_P92082  | -0.7 | 1.1E-04 |
| STX6          | syntaxin 6                                                                                        | A_23_P331992 | -0.7 | 2.9E-03 |
| XIRP2         | xin actin-binding repeat containing 2                                                             | A_23_P108743 | -0.7 | 1.3E-02 |
| THRA          | thyroid hormone receptor, alpha (erythroblastic leukemia viral (v-erb-a) oncogene homolog, avian) | A_23_P207742 | -0.7 | 3.1E-03 |
| AASS          | aminoadipate-semialdehyde synthase                                                                | A_23_P8754   | -0.7 | 1.7E-03 |
| PCDHGC3       | protocadherin gamma subfamily C, 3                                                                | A_23_P218937 | -0.7 | 3.0E-02 |
| SARS          | seryl-tRNA synthetase                                                                             | A_24_P699737 | -0.7 | 6.5E-04 |
| RMND5A        | required for meiotic nuclear division 5 homolog A (S. cerevisiae)                                 | A_24_P114339 | -0.7 | 2.4E-03 |
| SEC22C        | SEC22 vesicle trafficking protein homolog C (S. cerevisiae)                                       | A_23_P502641 | -0.7 | 1.0E-05 |
| LOC645722     | hypothetical protein LOC645722                                                                    | A_24_P896205 | -0.7 | 4.9E-03 |

|              |                                                                                                           |              |      |         |
|--------------|-----------------------------------------------------------------------------------------------------------|--------------|------|---------|
| RPUSD3       | RNA pseudouridylate synthase domain containing 3                                                          | A_23_P255916 | -0.7 | 2.8E-06 |
| PKDREJ       | polycystic kidney disease (polycystin) and REJ homolog (sperm receptor for egg jelly homolog, sea urchin) | A_23_P120982 | -0.7 | 2.9E-02 |
| WDSUB1       | WD repeat, sterile alpha motif and U-box domain containing 1                                              | A_23_P108657 | -0.7 | 1.5E-05 |
| WFS1         | Wolfram syndrome 1 (wolframin)                                                                            | A_23_P121499 | -0.7 | 2.4E-04 |
| CACNB1       | calcium channel, voltage-dependent, beta 1 subunit                                                        | A_23_P405754 | -0.7 | 7.1E-04 |
| PSRC1        | proline/serine-rich coiled-coil 1                                                                         | A_23_P46539  | -0.7 | 5.0E-04 |
| LOC100009676 | hypothetical LOC100009676                                                                                 | A_32_P33561  | -0.7 | 4.1E-03 |
| SLC7A7       | solute carrier family 7 (cationic amino acid transporter, y+ system), member 7                            | A_23_P99642  | -0.7 | 2.5E-02 |
| CD59         | CD59 molecule, complement regulatory protein                                                              | A_24_P784765 | -0.7 | 1.6E-04 |
| NAT8         | N-acetyltransferase 8 (GCN5-related, putative)                                                            | A_23_P154379 | -0.7 | 1.9E-02 |
| VSX1         | visual system homeobox 1                                                                                  | A_23_P131990 | -0.7 | 2.8E-04 |
| RPS4Y1       | ribosomal protein S4, Y-linked 1                                                                          | A_23_P259314 | -0.7 | 1.1E-02 |
| IL6R         | interleukin 6 receptor                                                                                    | A_24_P379413 | -0.7 | 3.2E-03 |
| ELOVL3       | elongation of very long chain fatty acids (FEN1/Elo2, SUR4/Elo3, yeast)-like 3                            | A_23_P149858 | -0.7 | 1.4E-03 |
| CACNA1H      | calcium channel, voltage-dependent, T type, alpha 1H subunit                                              | A_23_P3483   | -0.7 | 4.9E-05 |
| TRIM7        | tripartite motif containing 7                                                                             | A_23_P30315  | -0.7 | 1.0E-02 |
| SEPT4        | septin 4                                                                                                  | A_23_P207003 | -0.7 | 4.0E-02 |
| HSPA2        | heat shock 70kDa protein 2                                                                                | A_23_P88303  | -0.7 | 4.8E-04 |
| RDX          | radixin                                                                                                   | A_23_P203023 | -0.7 | 8.4E-05 |
| PLCE1        | phospholipase C, epsilon 1                                                                                | A_23_P35617  | -0.7 | 3.9E-03 |
| PTEN         | phosphatase and tensin homolog                                                                            | A_32_P205139 | -0.7 | 6.4E-03 |
| MIER2        | mesoderm induction early response 1, family member 2                                                      | A_23_P119683 | -0.7 | 3.8E-04 |
| GEMIN5       | gem (nuclear organelle) associated protein 5                                                              | A_23_P336513 | -0.7 | 1.1E-04 |
| FOXO3        | forkhead box O3                                                                                           | A_24_P602052 | -0.7 | 1.2E-02 |
| LOC400960    | hypothetical LOC400960                                                                                    | A_24_P450194 | -0.7 | 6.3E-03 |
| ZNF30        | zinc finger protein 30                                                                                    | A_32_P203430 | -0.7 | 5.4E-03 |
| ZNF75D       | zinc finger protein 75D                                                                                   | A_23_P73708  | -0.7 | 9.0E-04 |
| NBEAL2       | neurobeachin-like 2                                                                                       | A_24_P272160 | -0.7 | 3.1E-04 |
| MKLN1        | muskelin 1, intracellular mediator containing kelch motifs                                                | A_24_P170327 | -0.7 | 6.4E-06 |
| LAMC1        | laminin, gamma 1 (formerly LAMB2)                                                                         | A_23_P201628 | -0.7 | 1.6E-04 |
| HCLS1        | hematopoietic cell-specific Lyn substrate 1                                                               | A_23_P73429  | -0.7 | 1.0E-02 |
| C14orf153    | chromosome 14 open reading frame 153                                                                      | A_24_P22174  | -0.7 | 4.1E-02 |
| S100A4       | S100 calcium binding protein A4                                                                           | A_23_P94800  | -0.7 | 4.3E-03 |
| LOC100288939 | similar to hCG1987955                                                                                     | A_32_P174398 | -0.7 | 3.8E-05 |
| GPR157       | G protein-coupled receptor 157                                                                            | A_24_P71280  | -0.7 | 3.3E-03 |
| ABTB1        | ankyrin repeat and BTB (POZ) domain containing 1                                                          | A_24_P200297 | -0.7 | 2.5E-06 |
| LOC100130729 | hypothetical protein LOC100130729                                                                         | A_23_P75355  | -0.7 | 2.6E-04 |

|           |                                                                                         |              |      |         |
|-----------|-----------------------------------------------------------------------------------------|--------------|------|---------|
| MAP2K5    | mitogen-activated protein kinase kinase 5                                               | A_23_P84256  | -0.7 | 3.4E-02 |
| NISCH     | nischarin                                                                               | A_24_P925709 | -0.7 | 4.2E-06 |
| FABP5     | fatty acid binding protein 5 (psoriasis-associated)                                     | A_32_P204676 | -0.7 | 1.9E-02 |
| ZFHX3     | zinc finger homeobox 3                                                                  | A_23_P118266 | -0.7 | 1.6E-05 |
| MAN2A2    | mannosidase, alpha, class 2A, member 2                                                  | A_23_P37569  | -0.7 | 8.0E-05 |
| C9orf150  | chromosome 9 open reading frame 150                                                     | A_23_P83007  | -0.7 | 2.5E-03 |
| CCDC71    | coiled-coil domain containing 71                                                        | A_23_P61308  | -0.7 | 3.1E-03 |
| STXBP4    | syntaxin binding protein 4                                                              | A_23_P375566 | -0.7 | 8.8E-03 |
| ESRP1     | epithelial splicing regulatory protein 1                                                | A_23_P259127 | -0.7 | 6.4E-03 |
| MSH4      | mutS homolog 4 (E. coli)                                                                | A_23_P74068  | -0.7 | 3.5E-02 |
| TP53I3    | tumor protein p53 inducible protein 3                                                   | A_23_P5392   | -0.7 | 5.8E-03 |
| DUSP8     | dual specificity phosphatase 8                                                          | A_24_P322867 | -0.7 | 2.5E-02 |
| BCL2L2    | BCL2-like 2                                                                             | A_23_P418373 | -0.7 | 1.2E-07 |
| HIP1R     | huntingtin interacting protein 1 related                                                | A_23_P398294 | -0.7 | 3.5E-04 |
| OPLAH     | 5-oxoprolinase (ATP-hydrolysing)                                                        | A_23_P170186 | -0.7 | 2.0E-06 |
| RPP25     | ribonuclease P/MRP 25kDa subunit                                                        | A_23_P3424   | -0.7 | 9.8E-05 |
| ZFP106    | zinc finger protein 106 homolog (mouse)                                                 | A_23_P77310  | -0.7 | 9.0E-06 |
| MBIP      | MAP3K12 binding inhibitory protein 1                                                    | A_23_P2922   | -0.7 | 3.3E-03 |
| MAPK13    | mitogen-activated protein kinase 13                                                     | A_24_P406132 | -0.7 | 9.1E-03 |
| DERA      | deoxyribose-phosphate aldolase (putative)                                               | A_23_P25253  | -0.7 | 2.2E-07 |
| DHCR7     | 7-dehydrocholesterol reductase                                                          | A_23_P24444  | -0.7 | 1.3E-03 |
| TJP1      | tight junction protein 1 (zona occludens 1)                                             | A_24_P193435 | -0.7 | 5.5E-05 |
| TAS1R1    | taste receptor, type 1, member 1                                                        | A_23_P160886 | -0.7 | 7.0E-03 |
| ACSM3     | acyl-CoA synthetase medium-chain family member 3                                        | A_23_P317756 | -0.7 | 2.6E-03 |
| SUSD2     | sushi domain containing 2                                                               | A_23_P314101 | -0.7 | 3.9E-03 |
| SLC22A15  | solute carrier family 22, member 15                                                     | A_23_P388900 | -0.7 | 3.0E-03 |
| FDFT1     | farnesyl-diphosphate farnesyltransferase 1                                              | A_23_P71319  | -0.7 | 2.1E-04 |
| MAP3K13   | mitogen-activated protein kinase kinase kinase 13                                       | A_24_P85537  | -0.7 | 1.5E-02 |
| CYP4Z2P   | cytochrome P450, family 4, subfamily Z, polypeptide 2 pseudogene                        | A_24_P145529 | -0.7 | 1.5E-02 |
| TMEM140   | transmembrane protein 140                                                               | A_23_P31177  | -0.7 | 4.6E-02 |
| SIAE      | sialic acid acetyltransferase                                                           | A_23_P318881 | -0.6 | 4.2E-02 |
| HSBP1L1   | heat shock factor binding protein 1-like 1                                              | A_24_P683905 | -0.6 | 3.1E-04 |
| SLC25A16  | solute carrier family 25 (mitochondrial carrier; Graves disease autoantigen), member 16 | A_23_P423891 | -0.6 | 3.1E-04 |
| DLC1      | deleted in liver cancer 1                                                               | A_23_P252721 | -0.6 | 1.8E-02 |
| PDE8B     | phosphodiesterase 8B                                                                    | A_24_P197537 | -0.6 | 2.1E-02 |
| PRDM2     | PR domain containing 2, with ZNF domain                                                 | A_23_P201079 | -0.6 | 1.2E-05 |
| LRRC32    | leucine rich repeat containing 32                                                       | A_24_P389916 | -0.6 | 2.1E-02 |
| HIST2H2AC | histone cluster 2, H2ac                                                                 | A_23_P301247 | -0.6 | 1.1E-04 |
| KBTBD7    | kelch repeat and BTB (POZ) domain containing 7                                          | A_23_P25605  | -0.6 | 3.2E-03 |
| TRIM25    | tripartite motif containing 25                                                          | A_24_P936767 | -0.6 | 1.5E-03 |

|            |                                                                                                   |              |      |         |
|------------|---------------------------------------------------------------------------------------------------|--------------|------|---------|
| MAN2C1     | mannosidase, alpha, class 2C, member 1                                                            | A_23_P369150 | -0.6 | 4.4E-04 |
| GSTM1      | glutathione S-transferase mu 1                                                                    | A_23_P115407 | -0.6 | 2.3E-03 |
| SEPT7P2    | septin 7 pseudogene 2                                                                             | A_24_P925635 | -0.6 | 2.3E-02 |
| NDUFA10    | NADH dehydrogenase (ubiquinone) 1 alpha subcomplex, 10, 42kDa                                     | A_24_P396889 | -0.6 | 2.7E-04 |
| TAF1C      | TATA box binding protein (TBP)-associated factor, RNA polymerase I, C, 110kDa                     | A_23_P163546 | -0.6 | 3.1E-04 |
| AMDHD1     | amidohydrolase domain containing 1                                                                | A_32_P122226 | -0.6 | 1.9E-04 |
| FITM2      | fat storage-inducing transmembrane protein 2                                                      | A_24_P203407 | -0.6 | 1.1E-04 |
| COX4I2     | cytochrome c oxidase subunit IV isoform 2 (lung)                                                  | A_23_P210869 | -0.6 | 1.6E-02 |
| PCBP2      | poly(rC) binding protein 2                                                                        | A_24_P141688 | -0.6 | 1.7E-07 |
| PRDM16     | PR domain containing 16                                                                           | A_32_P225816 | -0.6 | 4.0E-03 |
| FAM21C     | family with sequence similarity 21, member C                                                      | A_24_P289420 | -0.6 | 5.6E-05 |
| TCF21      | transcription factor 21                                                                           | A_23_P156890 | -0.6 | 2.7E-02 |
| GCAT       | glycine C-acetyltransferase                                                                       | A_23_P40657  | -0.6 | 3.8E-04 |
| RAD21      | RAD21 homolog ( <i>S. pombe</i> )                                                                 | A_32_P195137 | -0.6 | 1.8E-03 |
| LOC202181  | hypothetical LOC202181                                                                            | A_32_P1533   | -0.6 | 4.9E-05 |
| SETD4      | SET domain containing 4                                                                           | A_23_P211106 | -0.6 | 1.3E-04 |
| FGD4       | FYVE, RhoGEF and PH domain containing 4                                                           | A_24_P937325 | -0.6 | 3.2E-02 |
| ZNF641     | zinc finger protein 641                                                                           | A_23_P64785  | -0.6 | 1.8E-02 |
| TRAK2      | trafficking protein, kinesin binding 2                                                            | A_24_P122874 | -0.6 | 1.3E-05 |
| COMTD1     | catechol-O-methyltransferase domain containing 1                                                  | A_23_P115862 | -0.6 | 4.3E-07 |
| FLJ35700   | hypothetical protein FLJ35700                                                                     | A_23_P342165 | -0.6 | 4.0E-03 |
| IBA57      | IBA57, iron-sulfur cluster assembly homolog ( <i>S. cerevisiae</i> )                              | A_32_P436884 | -0.6 | 2.3E-05 |
| MLXIPL     | MLX interacting protein-like                                                                      | A_24_P200831 | -0.6 | 5.6E-03 |
| GSTM2P1    | glutathione S-transferase mu 2 (muscle) pseudogene 1                                              | A_23_P58869  | -0.6 | 7.2E-03 |
| KRIT1      | KRIT1, ankyrin repeat containing                                                                  | A_24_P98161  | -0.6 | 1.5E-02 |
| KY         | kyphoscoliosis peptidase                                                                          | A_23_P399897 | -0.6 | 2.7E-02 |
| TECPR2     | tectonin beta-propeller repeat containing 2                                                       | A_32_P355396 | -0.6 | 2.8E-05 |
| MMS19      | MMS19 nucleotide excision repair homolog ( <i>S. cerevisiae</i> )                                 | A_23_P46982  | -0.6 | 1.6E-08 |
| SP5        | Sp5 transcription factor                                                                          | A_32_P183718 | -0.6 | 2.7E-02 |
| NECAB3     | N-terminal EF-hand calcium binding protein 3                                                      | A_23_P68628  | -0.6 | 6.7E-04 |
| CLN3       | ceroid-lipofuscinosis, neuronal 3                                                                 | A_24_P296424 | -0.6 | 3.8E-05 |
| NCRNA00120 | non-protein coding RNA 120                                                                        | A_23_P19243  | -0.6 | 1.4E-03 |
| BEX2       | brain expressed X-linked 2                                                                        | A_23_P22735  | -0.6 | 2.1E-03 |
| SDHAP3     | succinate dehydrogenase complex, subunit A, flavoprotein pseudogene 3                             | A_23_P156807 | -0.6 | 3.3E-04 |
| SMARCA5    | SWI/SNF related, matrix associated, actin dependent regulator of chromatin, subfamily a, member 5 | A_32_P213678 | -0.6 | 2.4E-02 |
| CD47       | CD47 molecule                                                                                     | A_24_P943792 | -0.6 | 1.1E-02 |
| STARD7     | StAR-related lipid transfer (START) domain containing 7                                           | A_23_P120237 | -0.6 | 1.5E-06 |

|           |                                                                                             |              |      |         |
|-----------|---------------------------------------------------------------------------------------------|--------------|------|---------|
| KIAA1462  | KIAA1462                                                                                    | A_32_P529165 | -0.6 | 2.2E-02 |
| PGS1      | phosphatidylglycerophosphate synthase 1                                                     | A_24_P290799 | -0.6 | 2.4E-04 |
| MGLL      | monoglyceride lipase                                                                        | A_24_P226008 | -0.6 | 1.2E-03 |
| RENBP     | renin binding protein                                                                       | A_23_P137157 | -0.6 | 7.6E-03 |
| PRKCD     | protein kinase C, delta                                                                     | A_23_P144054 | -0.6 | 2.5E-06 |
| HTATIP2   | HIV-1 Tat interactive protein 2, 30kDa                                                      | A_23_P64129  | -0.6 | 1.6E-04 |
| FAM73A    | family with sequence similarity 73, member A                                                | A_24_P58395  | -0.6 | 2.1E-04 |
| SEMA6D    | sema domain, transmembrane domain (TM), and cytoplasmic domain, (semaphorin) 6D             | A_23_P420442 | -0.6 | 1.8E-02 |
| PTPLA     | protein tyrosine phosphatase-like (proline instead of catalytic arginine), member A         | A_23_P161352 | -0.6 | 2.7E-03 |
| GLO1      | glyoxalase I                                                                                | A_23_P214411 | -0.6 | 6.7E-05 |
| PLEKHA7   | pleckstrin homology domain containing, family A member 7                                    | A_24_P348806 | -0.6 | 3.8E-03 |
| GORASP1   | golgi reassembly stacking protein 1, 65kDa                                                  | A_23_P427114 | -0.6 | 5.1E-03 |
| PRRG4     | proline rich Gla (G-carboxyglutamic acid) 4 (transmembrane)                                 | A_24_P47329  | -0.6 | 6.4E-03 |
| MLX       | MAX-like protein X                                                                          | A_24_P13991  | -0.6 | 1.7E-05 |
| ZNF77     | zinc finger protein 77                                                                      | A_32_P182394 | -0.6 | 1.9E-02 |
| C2        | complement component 2                                                                      | A_23_P133916 | -0.6 | 3.4E-02 |
| PLCXD1    | phosphatidylinositol-specific phospholipase C, X domain containing 1                        | A_23_P61180  | -0.6 | 4.9E-02 |
| SLC35D2   | solute carrier family 35, member D2                                                         | A_23_P32029  | -0.6 | 1.7E-05 |
| CXADRP3   | coxsackie virus and adenovirus receptor pseudogene 3                                        | A_24_P161725 | -0.6 | 7.8E-04 |
| B3GNT7    | UDP-GlcNAc:betaGal beta-1,3-N-acetylglucosaminyltransferase 7                               | A_24_P20292  | -0.6 | 7.9E-03 |
| FLCN      | folliculin                                                                                  | A_24_P173124 | -0.6 | 5.7E-03 |
| SNORD123  | small nucleolar RNA, C/D box 123                                                            | A_24_P639679 | -0.6 | 2.1E-03 |
| KIAA0649  | KIAA0649                                                                                    | A_23_P146497 | -0.6 | 1.5E-05 |
| MAPK14    | mitogen-activated protein kinase 14                                                         | A_24_P397566 | -0.6 | 2.2E-02 |
| OR7E47P   | olfactory receptor, family 7, subfamily E, member 47 pseudogene                             | A_24_P170514 | -0.6 | 1.2E-02 |
| CCDC101   | coiled-coil domain containing 101                                                           | A_23_P388914 | -0.6 | 3.1E-05 |
| CYB5A     | cytochrome b5 type A (microsomal)                                                           | A_23_P101208 | -0.6 | 1.8E-02 |
| CHML      | choroideremia-like (Rab escort protein 2)                                                   | A_24_P712350 | -0.6 | 1.9E-04 |
| N4BP1     | NEDD4 binding protein 1                                                                     | A_23_P66085  | -0.6 | 3.3E-04 |
| OGDH      | oxoglutarate (alpha-ketoglutarate) dehydrogenase (lipoamide)                                | A_23_P123133 | -0.6 | 8.0E-04 |
| LOC339290 | hypothetical LOC339290                                                                      | A_32_P150876 | -0.6 | 3.0E-02 |
| ENY2      | enhancer of yellow 2 homolog (Drosophila)                                                   | A_24_P81149  | -0.6 | 6.5E-03 |
| PINK1     | PTEN induced putative kinase 1                                                              | A_23_P23194  | -0.6 | 3.7E-06 |
| NDUFA4L2  | NADH dehydrogenase (ubiquinone) 1 alpha subcomplex, 4-like 2                                | A_23_P9614   | -0.6 | 2.0E-02 |
| SLC25A5   | solute carrier family 25 (mitochondrial carrier; adenine nucleotide translocator), member 5 | A_24_P182182 | -0.6 | 7.7E-05 |
| VPS13D    | vacuolar protein sorting 13 homolog D (S. cerevisiae)                                       | A_23_P251216 | -0.6 | 2.8E-02 |

|              |                                                                                              |              |      |         |
|--------------|----------------------------------------------------------------------------------------------|--------------|------|---------|
| DOCK11       | dedicator of cytokinesis 11                                                                  | A_24_P76158  | -0.6 | 2.0E-02 |
| PPP3R1       | protein phosphatase 3, regulatory subunit B, alpha                                           | A_23_P108592 | -0.6 | 4.3E-02 |
| PCP2         | Purkinje cell protein 2                                                                      | A_24_P399500 | -0.6 | 3.9E-03 |
| VAMP3        | vesicle-associated membrane protein 3 (cellubrevin)                                          | A_24_P370887 | -0.6 | 2.2E-05 |
| NKPD1        | NTPase, KAP family P-loop domain containing 1                                                | A_32_P319858 | -0.6 | 7.2E-03 |
| PNPLA7       | patatin-like phospholipase domain containing 7                                               | A_24_P453855 | -0.6 | 2.6E-03 |
| MUT          | methylmalonyl CoA mutase                                                                     | A_23_P400235 | -0.6 | 1.0E-07 |
| FLJ10038     | hypothetical protein FLJ10038                                                                | A_23_P106280 | -0.6 | 3.5E-05 |
| LOC100129946 | hypothetical LOC100129946                                                                    | A_32_P711043 | -0.6 | 2.6E-02 |
| CDKN2AIPNL   | CDKN2A interacting protein N-terminal like                                                   | A_23_P250644 | -0.6 | 2.0E-03 |
| LOC440104    | 1110012D08Rik pseudogene                                                                     | A_24_P93703  | -0.6 | 1.7E-05 |
| GAL3ST1      | galactose-3-O-sulfotransferase 1                                                             | A_23_P120863 | -0.6 | 4.5E-02 |
| PACSIN3      | protein kinase C and casein kinase substrate in neurons 3                                    | A_24_P381136 | -0.6 | 1.4E-03 |
| MKL2         | MKL/myocardin-like 2                                                                         | A_23_P54556  | -0.6 | 6.1E-04 |
| HDAC6        | histone deacetylase 6                                                                        | A_24_P205137 | -0.6 | 5.7E-05 |
| ZNF596       | zinc finger protein 596                                                                      | A_23_P82762  | -0.6 | 2.2E-02 |
| C21orf122    | chromosome 21 open reading frame 122                                                         | A_23_P143514 | -0.6 | 7.5E-03 |
| DNM2         | dynamain 2                                                                                   | A_23_P407074 | -0.6 | 3.3E-07 |
| PLCB2        | phospholipase C, beta 2                                                                      | A_24_P936779 | -0.6 | 1.7E-02 |
| HLF          | hepatic leukemia factor                                                                      | A_23_P356585 | -0.6 | 4.6E-02 |
| ALDH2        | aldehyde dehydrogenase 2 family (mitochondrial)                                              | A_23_P36745  | -0.6 | 8.1E-03 |
| MEF2A        | myocyte enhancer factor 2A                                                                   | A_24_P1731   | -0.6 | 1.5E-04 |
| ESRP2        | epithelial splicing regulatory protein 2                                                     | A_23_P100220 | -0.6 | 2.7E-03 |
| PCDHGA3      | protocadherin gamma subfamily A, 3                                                           | A_24_P334529 | -0.6 | 8.6E-03 |
| ZNF589       | zinc finger protein 589                                                                      | A_23_P110031 | -0.6 | 5.1E-03 |
| PPP1R13B     | protein phosphatase 1, regulatory (inhibitor) subunit 13B                                    | A_23_P205273 | -0.6 | 4.6E-07 |
| TBCE         | tubulin folding cofactor E                                                                   | A_23_P52147  | -0.6 | 3.7E-08 |
| AGPAT2       | 1-acylglycerol-3-phosphate O-acyltransferase 2 (lysophosphatidic acid acyltransferase, beta) | A_32_P26103  | -0.6 | 3.9E-02 |
| MAPK4        | mitogen-activated protein kinase 4                                                           | A_23_P375906 | -0.6 | 6.4E-03 |
| HIRIP3       | HIRA interacting protein 3                                                                   | A_24_P142269 | -0.6 | 2.6E-04 |
| SPEN         | spen homolog, transcriptional regulator (Drosophila)                                         | A_24_P170660 | -0.6 | 5.9E-04 |
| GIT1         | G protein-coupled receptor kinase interacting ArfGAP 1                                       | A_24_P347946 | -0.6 | 6.7E-04 |
| ZNF185       | zinc finger protein 185 (LIM domain)                                                         | A_23_P11025  | -0.6 | 1.7E-03 |
| PRKAB2       | protein kinase, AMP-activated, beta 2 non-catalytic subunit                                  | A_24_P917711 | -0.6 | 1.5E-02 |
| TRNP1        | TMF1-regulated nuclear protein 1                                                             | A_24_P693986 | -0.6 | 2.1E-02 |
| SBF2         | SET binding factor 2                                                                         | A_24_P324630 | -0.6 | 5.5E-03 |
| BFSP1        | beaded filament structural protein 1, filensin                                               | A_23_P109171 | -0.6 | 2.6E-03 |
| ASL          | argininosuccinate lyase                                                                      | A_23_P26223  | -0.6 | 6.5E-06 |
| TRIM56       | tripartite motif containing 56                                                               | A_23_P350107 | -0.6 | 4.9E-05 |

|           |                                                                               |              |      |         |
|-----------|-------------------------------------------------------------------------------|--------------|------|---------|
| RUNDC2C   | RUN domain containing 2C                                                      | A_24_P923922 | -0.6 | 4.2E-02 |
| ZNF704    | zinc finger protein 704                                                       | A_32_P229493 | -0.6 | 2.2E-02 |
| PRO2852   | hypothetical protein PRO2852                                                  | A_23_P350879 | -0.6 | 4.9E-02 |
| MTERFD3   | MTERF domain containing 3                                                     | A_23_P53530  | -0.6 | 6.1E-04 |
| PLEKHG3   | pleckstrin homology domain containing, family G (with RhoGef domain) member 3 | A_32_P311737 | -0.6 | 2.5E-03 |
| TAOK3     | TAO kinase 3                                                                  | A_23_P2203   | -0.6 | 1.9E-04 |
| EFNA1     | ephrin-A1                                                                     | A_23_P254512 | -0.6 | 6.1E-03 |
| SLAIN1    | SLAIN motif family, member 1                                                  | A_23_P348146 | -0.6 | 6.7E-04 |
| C14orf128 | chromosome 14 open reading frame 128                                          | A_23_P25746  | -0.6 | 1.6E-04 |
| SACM1L    | SAC1 suppressor of actin mutations 1-like (yeast)                             | A_23_P212383 | -0.6 | 3.9E-05 |
| C7orf23   | chromosome 7 open reading frame 23                                            | A_23_P157283 | -0.6 | 2.0E-03 |
| UBTD1     | ubiquitin domain containing 1                                                 | A_23_P161501 | -0.6 | 3.3E-04 |
| RAB11FIP2 | RAB11 family interacting protein 2 (class I)                                  | A_24_P363953 | -0.6 | 4.4E-04 |
| LAMA5     | laminin, alpha 5                                                              | A_23_P109269 | -0.6 | 3.8E-04 |
| SLC25A38  | solute carrier family 25, member 38                                           | A_23_P91814  | -0.6 | 1.1E-06 |
| FAM82A1   | family with sequence similarity 82, member A1                                 | A_24_P131392 | -0.6 | 4.7E-03 |
| CRAMP1L   | Crm, cramped-like (Drosophila)                                                | A_23_P407992 | -0.6 | 1.9E-02 |
| GBGT1     | globoside alpha-1,3-N-acetylgalactosaminyltransferase 1                       | A_23_P146576 | -0.6 | 2.7E-04 |
| GSTCD     | glutathione S-transferase, C-terminal domain containing                       | A_23_P110288 | -0.6 | 7.6E-03 |
| TXNRD2    | thioredoxin reductase 2                                                       | A_24_P943588 | -0.6 | 5.1E-03 |
| C12orf47  | chromosome 12 open reading frame 47                                           | A_23_P99204  | -0.6 | 6.7E-04 |
| YEATS2    | YEATS domain containing 2                                                     | A_23_P69437  | -0.6 | 8.4E-04 |
| CCDC69    | coiled-coil domain containing 69                                              | A_24_P97825  | -0.6 | 1.0E-02 |
| ZNF467    | zinc finger protein 467                                                       | A_23_P59470  | -0.6 | 1.8E-03 |
| ENG       | endoglin                                                                      | A_23_P83328  | -0.6 | 1.6E-02 |
| FAM21A    | family with sequence similarity 21, member A                                  | A_24_P677639 | -0.6 | 5.3E-03 |
| KLHL24    | kelch-like 24 (Drosophila)                                                    | A_24_P521994 | -0.6 | 4.6E-03 |
| CDCA7L    | cell division cycle associated 7-like                                         | A_24_P274795 | -0.6 | 3.5E-04 |
| FLJ37453  | hypothetical LOC729614                                                        | A_23_P302134 | -0.6 | 2.9E-04 |
| HAGH      | hydroxyacylglutathione hydrolase                                              | A_24_P176445 | -0.6 | 9.2E-08 |
| RCSD1     | RCSD domain containing 1                                                      | A_23_P23279  | -0.6 | 8.8E-03 |
| ISY1      | ISY1 splicing factor homolog (S. cerevisiae)                                  | A_23_P155179 | -0.6 | 1.1E-03 |
| ABHD6     | abhydrolase domain containing 6                                               | A_23_P211850 | -0.6 | 3.4E-03 |
| NFIC      | nuclear factor I/C (CCAAT-binding transcription factor)                       | A_23_P131115 | -0.6 | 4.2E-05 |
| UCHL5     | ubiquitin carboxyl-terminal hydrolase L5                                      | A_32_P38242  | -0.6 | 2.5E-02 |
| GLUL      | glutamate-ammonia ligase                                                      | A_32_P156628 | -0.6 | 4.7E-03 |
| STX12     | syntaxin 12                                                                   | A_23_P385206 | -0.6 | 2.7E-04 |
| TBC1D20   | TBC1 domain family, member 20                                                 | A_24_P392958 | -0.6 | 1.0E-04 |
| FLJ43663  | hypothetical LOC378805                                                        | A_24_P455972 | -0.6 | 4.0E-02 |



|          |                                                              |              |      |         |
|----------|--------------------------------------------------------------|--------------|------|---------|
| MAVS     | mitochondrial antiviral signaling protein                    | A_24_P928798 | -0.6 | 5.9E-06 |
| JAM3     | junctional adhesion molecule 3                               | A_24_P86993  | -0.6 | 2.8E-02 |
| KLRAQ1   | KLRAQ motif containing 1                                     | A_24_P68819  | -0.6 | 5.5E-06 |
| CCNB1IP1 | cyclin B1 interacting protein 1, E3 ubiquitin protein ligase | A_23_P76882  | -0.6 | 1.0E-06 |
| EXD2     | exonuclease 3'-5' domain containing 2                        | A_23_P205293 | -0.6 | 5.7E-03 |
| PARK2    | parkinson protein 2, E3 ubiquitin protein ligase (parkin)    | A_23_P136077 | -0.6 | 4.2E-02 |

### Supplementary Table 4. Genes in the bronchiolar signature (cluster 1)

Genes with a fold change (FC)  $\geq |1.5|$  and Benjamini-Hochberg adjusted p-value  $< 0.05$  in IPF (N=40) compared to control (N=8) bulk lung biopsies are listed.

| Gene symbol | Gene Name                                                            | Agilent probe ID | Log <sub>2</sub> FC | q-value |
|-------------|----------------------------------------------------------------------|------------------|---------------------|---------|
| MMP1        | matrix metalloproteinase 1 (interstitial collagenase)                | A_23_P1691       | 5.2                 | 6.4E-07 |
| GPR87       | G protein-coupled receptor 87                                        | A_23_P121120     | 4.6                 | 6.8E-08 |
| KRT17       | keratin 17                                                           | A_23_P96158      | 4.0                 | 4.0E-09 |
| CXCL6       | chemokine (C-X-C motif) ligand 6 (granulocyte chemotactic protein 2) | A_23_P155755     | 3.7                 | 3.6E-05 |
| KRT14       | keratin 14                                                           | A_24_P265346     | 3.6                 | 2.1E-08 |
| SERPINB3    | serpin peptidase inhibitor, clade B (ovalbumin), member 3            | A_23_P55632      | 3.6                 | 6.1E-04 |
| VTCN1       | V-set domain containing T cell activation inhibitor 1                | A_23_P518        | 3.5                 | 2.1E-04 |
| S100A2      | S100 calcium binding protein A2                                      | A_23_P201706     | 3.4                 | 1.5E-05 |
| MSMB        | microseminoprotein, beta-                                            | A_24_P146683     | 3.4                 | 7.9E-03 |
| SERPINB4    | serpin peptidase inhibitor, clade B (ovalbumin), member 4            | A_23_P502413     | 3.3                 | 8.8E-04 |
| TNS4        | tensin 4                                                             | A_23_P207850     | 3.1                 | 8.0E-06 |
| TP63        | tumor protein p63                                                    | A_23_P327380     | 3.1                 | 2.9E-06 |
| LGALS7      | lectin, galactoside-binding, soluble, 7                              | A_24_P238250     | 3.1                 | 3.4E-05 |
| TMPRSS4     | transmembrane protease, serine 4                                     | A_23_P127608     | 3.0                 | 2.1E-06 |
| LGALS7B     | lectin, galactoside-binding, soluble, 7B                             | A_24_P348118     | 2.9                 | 4.0E-05 |
| CP          | ceruloplasmin (ferroxidase)                                          | A_23_P414793     | 2.9                 | 2.3E-05 |
| CYP24A1     | cytochrome P450, family 24, subfamily A, polypeptide 1               | A_23_P28815      | 2.8                 | 2.0E-04 |
| DAPL1       | death associated protein-like 1                                      | A_23_P165598     | 2.8                 | 2.0E-05 |
| KRT6B       | keratin 6B                                                           | A_23_P76249      | 2.7                 | 3.8E-04 |
| KRT5        | keratin 5                                                            | A_23_P218047     | 2.7                 | 1.3E-05 |
| LCN2        | lipocalin 2                                                          | A_23_P169437     | 2.6                 | 1.9E-05 |
| UGT1A6      | UDP glucuronosyltransferase 1 family, polypeptide A6                 | A_24_P222872     | 2.6                 | 5.0E-05 |
| PROM1       | prominin 1                                                           | A_23_P258463     | 2.6                 | 2.4E-03 |
| PIP         | prolactin-induced protein                                            | A_23_P8702       | 2.5                 | 4.7E-03 |
| DSG3        | desmoglein 3                                                         | A_23_P153120     | 2.4                 | 5.8E-04 |
| PAX9        | paired box 9                                                         | A_32_P70818      | 2.4                 | 6.1E-04 |
| STMN2       | stathmin-like 2                                                      | A_23_P146274     | 2.4                 | 1.4E-05 |
| OXTR        | oxytocin receptor                                                    | A_23_P132619     | 2.4                 | 3.0E-04 |
| SIX4        | SIX homeobox 4                                                       | A_32_P204205     | 2.4                 | 1.1E-05 |
| C8orf47     | chromosome 8 open reading frame 47                                   | A_23_P333029     | 2.4                 | 6.0E-04 |
| SIX1        | SIX homeobox 1                                                       | A_23_P76914      | 2.4                 | 3.0E-04 |
| CHST6       | carbohydrate (N-acetylglucosamine 6-O) sulfotransferase 6            | A_23_P106922     | 2.3                 | 9.5E-05 |
| MMP3        | matrix metalloproteinase 3 (stromelysin 1, progelatinase)            | A_23_P161698     | 2.3                 | 2.1E-05 |

|          |                                                                                                      |              |     |         |
|----------|------------------------------------------------------------------------------------------------------|--------------|-----|---------|
| CLCA2    | chloride channel accessory 2                                                                         | A_23_P397248 | 2.3 | 2.0E-04 |
| FUT2     | fucosyltransferase 2 (secretor status included)                                                      | A_24_P942969 | 2.3 | 3.0E-04 |
| KRT6C    | keratin 6C                                                                                           | A_23_P366936 | 2.2 | 5.7E-03 |
| DST      | dystonin                                                                                             | A_23_P59388  | 2.2 | 4.5E-05 |
| PSCA     | prostate stem cell antigen                                                                           | A_23_P71379  | 2.2 | 2.5E-02 |
| B3GNT3   | UDP-GlcNAc:betaGal beta-1,3-N-acetylglucosaminyltransferase 3                                        | A_23_P78980  | 2.2 | 4.8E-06 |
| OGDHL    | oxoglutarate dehydrogenase-like                                                                      | A_23_P161297 | 2.2 | 4.1E-05 |
| ABCA13   | ATP-binding cassette, sub-family A (ABC1), member 13                                                 | A_23_P364324 | 2.1 | 1.9E-03 |
| SLCO1B3  | solute carrier organic anion transporter family, member 1B3                                          | A_23_P105475 | 2.1 | 1.8E-04 |
| MUC4     | mucin 4, cell surface associated                                                                     | A_24_P208825 | 2.1 | 6.9E-05 |
| SRD5A2   | steroid-5-alpha-reductase, alpha polypeptide 2 (3-oxo-5 alpha-steroid delta 4-dehydrogenase alpha 2) | A_23_P28186  | 2.1 | 6.8E-03 |
| DSC3     | desmocollin 3                                                                                        | A_24_P344416 | 2.1 | 3.7E-03 |
| PCDH7    | protocadherin 7                                                                                      | A_23_P310921 | 2.1 | 3.6E-06 |
| RHOV     | ras homolog gene family, member V                                                                    | A_23_P424561 | 2.1 | 8.5E-04 |
| HSPA4L   | heat shock 70kDa protein 4-like                                                                      | A_23_P363936 | 2.1 | 8.0E-06 |
| CXCL1    | chemokine (C-X-C motif) ligand 1 (melanoma growth stimulating activity, alpha)                       | A_23_P7144   | 2.1 | 9.0E-04 |
| ALDH3A1  | aldehyde dehydrogenase 3 family, member A1                                                           | A_23_P207213 | 2.0 | 5.8E-04 |
| PTPRZ1   | protein tyrosine phosphatase, receptor-type, Z polypeptide 1                                         | A_23_P168761 | 2.0 | 2.4E-04 |
| LY6D     | lymphocyte antigen 6 complex, locus D                                                                | A_23_P134764 | 2.0 | 6.1E-04 |
| SERPINB5 | serpin peptidase inhibitor, clade B (ovalbumin), member 5                                            | A_23_P208126 | 2.0 | 4.9E-04 |
| CLIC6    | chloride intracellular channel 6                                                                     | A_23_P385067 | 2.0 | 2.8E-06 |
| KRT15    | keratin 15                                                                                           | A_23_P27133  | 2.0 | 7.9E-04 |
| GSTA5    | glutathione S-transferase alpha 5                                                                    | A_23_P93141  | 1.9 | 2.2E-03 |
| ABCA12   | ATP-binding cassette, sub-family A (ABC1), member 12                                                 | A_23_P56369  | 1.9 | 9.5E-05 |
| FAM81B   | family with sequence similarity 81, member B                                                         | A_23_P360354 | 1.9 | 3.7E-03 |
| GSTA1    | glutathione S-transferase alpha 1                                                                    | A_23_P135417 | 1.9 | 7.5E-04 |
| FHOD3    | formin homology 2 domain containing 3                                                                | A_32_P34444  | 1.9 | 1.8E-04 |
| GJB5     | gap junction protein, beta 5, 31.1kDa                                                                | A_23_P35293  | 1.9 | 4.7E-03 |
| EFHC2    | EF-hand domain (C-terminal) containing 2                                                             | A_24_P147927 | 1.9 | 9.0E-04 |
| SLC4A11  | solute carrier family 4, sodium borate transporter, member 11                                        | A_23_P154688 | 1.8 | 3.4E-05 |
| CFB      | complement factor B                                                                                  | A_23_P156687 | 1.8 | 3.0E-06 |
| GSTA2    | glutathione S-transferase alpha 2                                                                    | A_24_P300394 | 1.8 | 2.4E-03 |
| IFNE     | interferon, epsilon                                                                                  | A_23_P302060 | 1.8 | 4.4E-04 |
| NELL2    | NEL-like 2 (chicken)                                                                                 | A_23_P10025  | 1.7 | 6.6E-04 |
| SAA4     | serum amyloid A4, constitutive                                                                       | A_23_P87238  | 1.7 | 1.3E-02 |
| MB       | myoglobin                                                                                            | A_23_P6433   | 1.7 | 1.7E-03 |
| RGS17    | regulator of G-protein signaling 17                                                                  | A_23_P156861 | 1.7 | 2.2E-05 |

|              |                                                                                                               |              |     |         |
|--------------|---------------------------------------------------------------------------------------------------------------|--------------|-----|---------|
| SMOC1        | SPARC related modular calcium binding 1                                                                       | A_24_P258473 | 1.7 | 1.9E-05 |
| LOC100505633 | hypothetical LOC100505633                                                                                     | A_24_P828496 | 1.7 | 1.4E-03 |
| NHS          | Nance-Horan syndrome (congenital cataracts and dental anomalies)                                              | A_32_P126375 | 1.7 | 8.8E-08 |
| KRT23        | keratin 23 (histone deacetylase inducible)                                                                    | A_23_P78248  | 1.7 | 1.5E-02 |
| HHLA2        | HERV-H LTR-associating 2                                                                                      | A_23_P368805 | 1.7 | 2.7E-03 |
| TRIM29       | tripartite motif containing 29                                                                                | A_23_P203267 | 1.7 | 2.4E-03 |
| SPRR1B       | small proline-rich protein 1B                                                                                 | A_23_P159406 | 1.7 | 3.1E-04 |
| PLCH2        | phospholipase C, eta 2                                                                                        | A_24_P62469  | 1.6 | 7.8E-06 |
| KCNMB2       | potassium large conductance calcium-activated channel, subfamily M, beta member 2                             | A_23_P158675 | 1.6 | 1.7E-03 |
| IVL          | involucrin                                                                                                    | A_23_P353524 | 1.6 | 5.4E-04 |
| TMEM45A      | transmembrane protein 45A                                                                                     | A_23_P113212 | 1.6 | 2.5E-04 |
| GCNT3        | glucosaminyl (N-acetyl) transferase 3, mucin type                                                             | A_23_P420209 | 1.6 | 4.0E-04 |
| HRK          | harakiri, BCL2 interacting protein (contains only BH3 domain)                                                 | A_23_P25194  | 1.6 | 1.9E-03 |
| DNER         | delta/notch-like EGF repeat containing                                                                        | A_23_P362148 | 1.6 | 8.9E-03 |
| RIMS2        | regulating synaptic membrane exocytosis 2                                                                     | A_23_P147786 | 1.6 | 1.2E-04 |
| PRR15        | proline rich 15                                                                                               | A_32_P154911 | 1.6 | 7.8E-03 |
| KCNH8        | potassium voltage-gated channel, subfamily H (eag-related), member 8                                          | A_23_P170636 | 1.6 | 2.3E-05 |
| MKX          | mohawk homeobox                                                                                               | A_24_P326491 | 1.6 | 8.8E-04 |
| FGF14        | fibroblast growth factor 14                                                                                   | A_23_P88033  | 1.5 | 4.1E-03 |
| KLHL13       | kelch-like 13 (Drosophila)                                                                                    | A_23_P159974 | 1.5 | 7.5E-07 |
| ST6GALNAC1   | ST6 (alpha-N-acetyl-neuraminyl-2,3-beta-galactosyl-1,3)-N-acetylgalactosaminide alpha-2,6-sialyltransferase 1 | A_23_P54968  | 1.5 | 6.8E-04 |
| MUCL1        | mucin-like 1                                                                                                  | A_23_P150979 | 1.5 | 9.5E-03 |
| POF1B        | premature ovarian failure, 1B                                                                                 | A_24_P250815 | 1.5 | 2.5E-03 |
| ANKRD43      | ankyrin repeat domain 43                                                                                      | A_23_P304110 | 1.5 | 5.4E-03 |
| NMNAT2       | nicotinamide nucleotide adenylyltransferase 2                                                                 | A_23_P345183 | 1.5 | 1.8E-04 |
| FAM169A      | family with sequence similarity 169, member A                                                                 | A_32_P84242  | 1.5 | 1.1E-06 |
| ZG16B        | zymogen granule protein 16 homolog B (rat)                                                                    | A_23_P118203 | 1.5 | 1.0E-02 |
| ELMOD1       | ELMO/CED-12 domain containing 1                                                                               | A_23_P401774 | 1.5 | 1.1E-03 |
| SLFN13       | schlafen family member 13                                                                                     | A_23_P301105 | 1.5 | 5.7E-05 |
| MLIP         | muscular LMNA-interacting protein                                                                             | A_23_P145555 | 1.4 | 1.2E-04 |
| PKIB         | protein kinase (cAMP-dependent, catalytic) inhibitor beta                                                     | A_23_P145529 | 1.4 | 8.0E-05 |
| NTN1         | netrin 1                                                                                                      | A_23_P15478  | 1.4 | 2.6E-04 |
| CRISPLD1     | cysteine-rich secretory protein LCCL domain containing 1                                                      | A_23_P59960  | 1.4 | 8.5E-07 |
| RBFOX1       | RNA binding protein, fox-1 homolog (C. elegans) 1                                                             | A_23_P140858 | 1.4 | 5.8E-04 |
| C7orf63      | chromosome 7 open reading frame 63                                                                            | A_23_P8653   | 1.4 | 3.9E-05 |
| KIF19        | kinesin family member 19                                                                                      | A_23_P404016 | 1.4 | 1.6E-03 |
| PRUNE2       | prune homolog 2 (Drosophila)                                                                                  | A_32_P43746  | 1.4 | 2.2E-04 |

|           |                                                                                   |              |     |         |
|-----------|-----------------------------------------------------------------------------------|--------------|-----|---------|
| UBXN10    | UBX domain protein 10                                                             | A_23_P85664  | 1.4 | 7.2E-04 |
| IGSF9     | immunoglobulin superfamily, member 9                                              | A_23_P85441  | 1.4 | 8.4E-06 |
| DDIT4L    | DNA-damage-inducible transcript 4-like                                            | A_23_P302672 | 1.4 | 2.4E-03 |
| FOXC1     | forkhead box C1                                                                   | A_23_P390504 | 1.4 | 1.8E-04 |
| NTS       | neurotensin                                                                       | A_23_P36882  | 1.4 | 6.7E-03 |
| CAPN13    | calpain 13                                                                        | A_23_P101972 | 1.3 | 5.9E-03 |
| PROM2     | prominin 2                                                                        | A_23_P154358 | 1.3 | 1.8E-05 |
| INHBB     | inhibin, beta B                                                                   | A_23_P153964 | 1.3 | 1.7E-03 |
| SMPD3     | sphingomyelin phosphodiesterase 3, neutral membrane (neutral sphingomyelinase II) | A_23_P163567 | 1.3 | 2.1E-04 |
| GSTA3     | glutathione S-transferase alpha 3                                                 | A_23_P253495 | 1.3 | 7.1E-03 |
| SLC47A2   | solute carrier family 47, member 2                                                | A_23_P77908  | 1.3 | 3.6E-03 |
| BMP7      | bone morphogenetic protein 7                                                      | A_23_P68487  | 1.3 | 2.6E-06 |
| ACCN2     | amiloride-sensitive cation channel 2, neuronal                                    | A_23_P204751 | 1.3 | 3.3E-06 |
| CCDC146   | coiled-coil domain containing 146                                                 | A_23_P168771 | 1.3 | 3.4E-03 |
| DNAJC12   | DnaJ (Hsp40) homolog, subfamily C, member 12                                      | A_23_P127220 | 1.3 | 3.7E-04 |
| SUSD4     | sushi domain containing 4                                                         | A_24_P259607 | 1.3 | 4.3E-03 |
| SNCAIP    | synuclein, alpha interacting protein                                              | A_23_P19020  | 1.3 | 6.9E-05 |
| SHISA6    | shisa homolog 6 ( <i>Xenopus laevis</i> )                                         | A_23_P411542 | 1.3 | 2.0E-03 |
| FANK1     | fibronectin type III and ankyrin repeat domains 1                                 | A_23_P115785 | 1.3 | 4.7E-03 |
| KIAA1045  | KIAA1045                                                                          | A_23_P319232 | 1.2 | 1.0E-03 |
| PPAP2C    | phosphatidic acid phosphatase type 2C                                             | A_23_P108294 | 1.2 | 6.1E-04 |
| LOC646976 | hypothetical LOC646976                                                            | A_24_P350546 | 1.2 | 5.5E-03 |
| KRT13     | keratin 13                                                                        | A_24_P228149 | 1.2 | 4.6E-03 |
| C4B       | complement component 4B (Chido blood group)                                       | A_23_P42282  | 1.2 | 1.9E-05 |
| NCS1      | neuronal calcium sensor 1                                                         | A_23_P217049 | 1.2 | 2.3E-05 |
| REEP2     | receptor accessory protein 2                                                      | A_23_P19182  | 1.2 | 1.3E-05 |
| AK4       | adenylate kinase 4                                                                | A_32_P108655 | 1.2 | 4.2E-04 |
| SERPINB13 | serpin peptidase inhibitor, clade B (ovalbumin), member 13                        | A_23_P432978 | 1.2 | 2.2E-02 |
| MUC20     | mucin 20, cell surface associated                                                 | A_23_P92222  | 1.2 | 5.9E-04 |
| SLC27A2   | solute carrier family 27 (fatty acid transporter), member 2                       | A_23_P140450 | 1.2 | 4.7E-03 |
| ENPP3     | ectonucleotide pyrophosphatase/phosphodiesterase 3                                | A_23_P404536 | 1.2 | 1.5E-05 |
| PGM2L1    | phosphoglucomutase 2-like 1                                                       | A_23_P396765 | 1.2 | 3.0E-06 |
| EFNB3     | ephrin-B3                                                                         | A_24_P940006 | 1.2 | 2.1E-05 |
| TSPAN1    | tetraspanin 1                                                                     | A_23_P160167 | 1.2 | 2.2E-03 |
| NGFR      | nerve growth factor receptor                                                      | A_23_P389897 | 1.2 | 2.5E-05 |
| RGS22     | regulator of G-protein signaling 22                                               | A_32_P125771 | 1.1 | 8.5E-03 |
| SPATA18   | spermatogenesis associated 18 homolog (rat)                                       | A_23_P407112 | 1.1 | 1.0E-03 |
| NKAIN2    | Na <sup>+</sup> /K <sup>+</sup> transporting ATPase interacting 2                 | A_23_P316501 | 1.1 | 1.6E-03 |
| TRPV4     | transient receptor potential cation channel, subfamily V, member 4                | A_24_P13381  | 1.1 | 9.2E-04 |

|          |                                                                               |              |     |         |
|----------|-------------------------------------------------------------------------------|--------------|-----|---------|
| PPP2R2B  | protein phosphatase 2, regulatory subunit B, beta                             | A_23_P213620 | 1.1 | 1.5E-06 |
| EPHB1    | EPH receptor B1                                                               | A_23_P166993 | 1.1 | 1.6E-03 |
| VSNL1    | visinin-like 1                                                                | A_23_P209978 | 1.1 | 1.3E-03 |
| GAD1     | glutamate decarboxylase 1 (brain, 67kDa)                                      | A_23_P374689 | 1.1 | 3.5E-03 |
| BCAS1    | breast carcinoma amplified sequence 1                                         | A_23_P17420  | 1.1 | 6.5E-03 |
| BIK      | BCL2-interacting killer (apoptosis-inducing)                                  | A_23_P404667 | 1.1 | 6.4E-04 |
| SLC2A1   | solute carrier family 2 (facilitated glucose transporter), member 1           | A_23_P571    | 1.1 | 4.4E-04 |
| SOX2-OT  | SOX2 overlapping transcript (non-protein coding)                              | A_24_P756289 | 1.1 | 9.2E-03 |
| ACHE     | acetylcholinesterase                                                          | A_24_P60845  | 1.1 | 1.5E-03 |
| LRGUK    | leucine-rich repeats and guanylate kinase domain containing                   | A_24_P346517 | 1.1 | 1.3E-02 |
| NGEF     | neuronal guanine nucleotide exchange factor                                   | A_23_P102364 | 1.1 | 5.8E-04 |
| AGR2     | anterior gradient homolog 2 ( <i>Xenopus laevis</i> )                         | A_23_P31407  | 1.1 | 1.5E-02 |
| PVRL1    | poliovirus receptor-related 1 (herpesvirus entry mediator C)                  | A_24_P50890  | 1.1 | 2.8E-06 |
| FBXO16   | F-box protein 16                                                              | A_23_P168847 | 1.0 | 7.4E-04 |
| TFF3     | trefoil factor 3 (intestinal)                                                 | A_23_P393099 | 1.0 | 6.5E-03 |
| FSIP1    | fibrous sheath interacting protein 1                                          | A_23_P353125 | 1.0 | 4.6E-03 |
| COL7A1   | collagen, type VII, alpha 1                                                   | A_23_P144071 | 1.0 | 1.7E-04 |
| IQCG     | IQ motif containing G                                                         | A_23_P300070 | 1.0 | 1.3E-02 |
| COX6B2   | cytochrome c oxidase subunit VIb polypeptide 2 (testis)                       | A_24_P267523 | 1.0 | 5.8E-03 |
| GLB1L3   | galactosidase, beta 1-like 3                                                  | A_32_P741851 | 1.0 | 4.0E-03 |
| MIA      | melanoma inhibitory activity                                                  | A_23_P4714   | 1.0 | 6.6E-03 |
| TPBG     | trophoblast glycoprotein                                                      | A_23_P59261  | 1.0 | 8.2E-07 |
| SPRR2D   | small proline-rich protein 2D                                                 | A_23_P11644  | 1.0 | 2.7E-03 |
| PRR7     | proline rich 7 (synaptic)                                                     | A_23_P30464  | 1.0 | 4.7E-05 |
| C16orf74 | chromosome 16 open reading frame 74                                           | A_24_P289178 | 1.0 | 1.1E-04 |
| SERTAD4  | SERTA domain containing 4                                                     | A_23_P318904 | 1.0 | 1.6E-03 |
| SCARA3   | scavenger receptor class A, member 3                                          | A_23_P215900 | 1.0 | 4.0E-05 |
| ABHD12B  | abhydrolase domain containing 12B                                             | A_23_P366035 | 1.0 | 4.5E-03 |
| HMGB3P1  | high mobility group box 3 pseudogene 1                                        | A_23_P373119 | 1.0 | 2.6E-03 |
| LOXL4    | lysyl oxidase-like 4                                                          | A_24_P406754 | 1.0 | 7.4E-04 |
| FAM83F   | family with sequence similarity 83, member F                                  | A_23_P343963 | 1.0 | 4.0E-03 |
| CLGN     | calmegin                                                                      | A_23_P18684  | 1.0 | 7.1E-03 |
| FAM83A   | family with sequence similarity 83, member A                                  | A_23_P216052 | 1.0 | 4.1E-03 |
| SIDT1    | SID1 transmembrane family, member 1                                           | A_23_P132515 | 0.9 | 2.9E-06 |
| RSPH9    | radial spoke head 9 homolog ( <i>Chlamydomonas</i> )                          | A_24_P55225  | 0.9 | 7.6E-03 |
| TPPP3    | tubulin polymerization-promoting protein family member 3                      | A_23_P26386  | 0.9 | 3.4E-04 |
| TXLNB    | taxilin beta                                                                  | A_23_P434398 | 0.9 | 4.2E-03 |
| SLC22A4  | solute carrier family 22 (organic cation/ergothioneine transporter), member 4 | A_23_P156180 | 0.9 | 2.7E-02 |
| GALNT6   | UDP-N-acetyl-alpha-D-galactosamine:polypeptide                                | A_23_P204133 | 0.9 | 5.2E-04 |

|           |                                                                           |              |     |         |
|-----------|---------------------------------------------------------------------------|--------------|-----|---------|
|           | N-acetylgalactosaminyltransferase 6 (GalNAc-T6)                           |              |     |         |
| HMGB3     | high mobility group box 3                                                 | A_23_P217236 | 0.9 | 1.1E-03 |
| STAG3     | stromal antigen 3                                                         | A_23_P145657 | 0.9 | 1.9E-03 |
| PPM1E     | protein phosphatase, Mg2+/Mn2+ dependent, 1E                              | A_32_P73796  | 0.9 | 1.3E-02 |
| HS3ST1    | heparan sulfate (glucosamine) 3-O-sulfotransferase 1                      | A_23_P121657 | 0.9 | 1.4E-02 |
| SPDEF     | SAM pointed domain containing ets transcription factor                    | A_23_P111194 | 0.9 | 7.7E-04 |
| CLU       | clusterin                                                                 | A_23_P215913 | 0.9 | 2.5E-03 |
| CARD14    | caspase recruitment domain family, member 14                              | A_23_P320070 | 0.9 | 9.5E-03 |
| GJB3      | gap junction protein, beta 3, 31kDa                                       | A_24_P379233 | 0.9 | 6.8E-03 |
| KREMEN2   | kringle containing transmembrane protein 2                                | A_23_P77612  | 0.9 | 2.4E-03 |
| ZFHX2     | zinc finger homeobox 2                                                    | A_32_P226205 | 0.9 | 6.5E-03 |
| SH3BGR    | SH3 domain binding glutamic acid-rich protein                             | A_23_P91520  | 0.9 | 7.3E-04 |
| NBEA      | neurobeachin                                                              | A_23_P65278  | 0.9 | 2.4E-03 |
| TMEM121   | transmembrane protein 121                                                 | A_23_P61987  | 0.9 | 1.2E-04 |
| GPT2      | glutamic pyruvate transaminase (alanine aminotransferase) 2               | A_23_P37892  | 0.9 | 3.1E-04 |
| GPR172B   | G protein-coupled receptor 172B                                           | A_23_P15692  | 0.8 | 7.4E-04 |
| C8orf45   | chromosome 8 open reading frame 45                                        | A_23_P390755 | 0.8 | 4.0E-03 |
| C10orf114 | chromosome 10 open reading frame 114                                      | A_32_P86739  | 0.8 | 5.8E-04 |
| AQP5      | aquaporin 5                                                               | A_23_P366812 | 0.8 | 2.5E-03 |
| NEK11     | NIMA (never in mitosis gene a)- related kinase 11                         | A_23_P211973 | 0.8 | 9.5E-03 |
| DZIP3     | DAZ interacting protein 3, zinc finger                                    | A_24_P102504 | 0.8 | 1.3E-02 |
| RGMA      | RGM domain family, member A                                               | A_23_P372308 | 0.8 | 7.3E-04 |
| FAAH2     | fatty acid amide hydrolase 2                                              | A_23_P113471 | 0.8 | 9.6E-04 |
| DZIP1     | DAZ interacting protein 1                                                 | A_23_P14157  | 0.8 | 4.8E-05 |
| PLEK2     | pleckstrin 2                                                              | A_23_P151506 | 0.8 | 5.5E-05 |
| C8orf75   | chromosome 8 open reading frame 75                                        | A_24_P333532 | 0.8 | 3.6E-02 |
| CCDC3     | coiled-coil domain containing 3                                           | A_24_P369232 | 0.8 | 2.4E-03 |
| LRIG3     | leucine-rich repeats and immunoglobulin-like domains 3                    | A_23_P47885  | 0.8 | 2.6E-03 |
| SYNGR1    | synaptogyrin 1                                                            | A_23_P211522 | 0.8 | 1.1E-05 |
| TMEM182   | transmembrane protein 182                                                 | A_23_P328000 | 0.8 | 8.5E-04 |
| ITGB4     | integrin, beta 4                                                          | A_23_P66355  | 0.8 | 7.8E-04 |
| C6orf225  | chromosome 6 open reading frame 225                                       | A_24_P756657 | 0.8 | 9.3E-03 |
| SYTL1     | synaptotagmin-like 1                                                      | A_32_P217773 | 0.8 | 1.3E-04 |
| SLC9A3R1  | solute carrier family 9 (sodium/hydrogen exchanger), member 3 regulator 1 | A_23_P308519 | 0.8 | 3.5E-05 |
| CALML4    | calmodulin-like 4                                                         | A_23_P129188 | 0.8 | 9.5E-03 |
| CROT      | carnitine O-octanoyltransferase                                           | A_23_P168669 | 0.7 | 8.8E-04 |
| C1orf190  | chromosome 1 open reading frame 190                                       | A_32_P129010 | 0.7 | 2.4E-03 |
| IGFBP2    | insulin-like growth factor binding protein 2, 36kDa                       | A_23_P119943 | 0.7 | 2.6E-03 |
| NTSE      | 5'-nucleotidase, ecto (CD73)                                              | A_24_P316430 | 0.7 | 2.6E-03 |

|              |                                                              |              |     |         |
|--------------|--------------------------------------------------------------|--------------|-----|---------|
| LOC728175    | hypothetical LOC728175                                       | A_23_P379111 | 0.7 | 4.1E-03 |
| PVRL4        | poliovirus receptor-related 4                                | A_23_P46441  | 0.7 | 4.1E-04 |
| RBM38        | RNA binding motif protein 38                                 | A_23_P17430  | 0.7 | 3.0E-04 |
| SORD         | sorbitol dehydrogenase                                       | A_32_P127153 | 0.7 | 2.4E-03 |
| ADAMTSL1     | ADAMTS-like 1                                                | A_23_P312415 | 0.7 | 5.7E-03 |
| GGT6         | gamma-glutamyltransferase 6                                  | A_23_P66767  | 0.7 | 9.5E-03 |
| DQX1         | DEAQ box RNA-dependent ATPase 1                              | A_23_P56659  | 0.7 | 5.5E-03 |
| TSPAN6       | tetraspanin 6                                                | A_24_P83262  | 0.7 | 1.0E-02 |
| MLF1         | myeloid leukemia factor 1                                    | A_24_P345679 | 0.7 | 2.1E-02 |
| DIRAS2       | DIRAS family, GTP-binding RAS-like 2                         | A_23_P20660  | 0.7 | 1.5E-02 |
| PITPNM1      | phosphatidylinositol transfer protein, membrane-associated 1 | A_23_P1519   | 0.7 | 5.7E-04 |
| STRA6        | stimulated by retinoic acid gene 6 homolog (mouse)           | A_23_P65779  | 0.6 | 2.4E-03 |
| HAGHL        | hydroxyacylglutathione hydrolase-like                        | A_24_P356373 | 0.6 | 5.1E-03 |
| SLC39A6      | solute carrier family 39 (zinc transporter), member 6        | A_24_P156049 | 0.6 | 2.5E-04 |
| ARHGAP39     | Rho GTPase activating protein 39                             | A_23_P424878 | 0.6 | 2.2E-02 |
| FAM83B       | family with sequence similarity 83, member B                 | A_24_P66780  | 0.6 | 4.0E-03 |
| XPR1         | xenotropic and polytropic retrovirus receptor 1              | A_23_P63534  | 0.6 | 1.1E-03 |
| GATS         | GATS, stromal antigen 3 opposite strand                      | A_23_P327777 | 0.6 | 1.4E-02 |
| LOC100134229 | hypothetical LOC100134229                                    | A_32_P54503  | 0.6 | 5.8E-03 |
| RHPN1        | rhopilin, Rho GTPase binding protein 1                       | A_23_P315386 | 0.6 | 6.6E-03 |
| BBS5         | Bardet-Biedl syndrome 5                                      | A_23_P5785   | 0.6 | 6.1E-03 |
| RPRM         | reprimin, TP53 dependent G2 arrest mediator candidate        | A_23_P5370   | 0.6 | 1.4E-02 |
| WDR35        | WD repeat domain 35                                          | A_23_P108463 | 0.6 | 3.7E-03 |



### Supplementary Table 5. Genes in the lymphoid signature (cluster 2)

Genes with a fold change (FC)  $\geq |1.5|$  and Benjamini-Hochberg adjusted p-value  $< 0.05$  in IPF (N=40) compared to control (N=8) bulk lung biopsies are listed.

| Gene symbol | Gene Name                                                                                 | Agilent probe ID | Log <sub>2</sub> FC | q-value |
|-------------|-------------------------------------------------------------------------------------------|------------------|---------------------|---------|
| CXCL13      | chemokine (C-X-C motif) ligand 13                                                         | A_23_P121695     | 3.5                 | 9.6E-05 |
| IGHV1-69    | immunoglobulin heavy variable 1-69                                                        | A_24_P367432     | 3.4                 | 3.7E-09 |
| IGLJ3       | immunoglobulin lambda joining 3                                                           | A_24_P605563     | 3.4                 | 4.8E-08 |
| CCR7        | chemokine (C-C motif) receptor 7                                                          | A_23_P343398     | 3.3                 | 3.1E-11 |
| POU2AF1     | POU class 2 associating factor 1                                                          | A_23_P312920     | 3.3                 | 4.6E-08 |
| IGJ         | immunoglobulin J polypeptide, linker protein for immunoglobulin alpha and mu polypeptides | A_23_P167168     | 3.3                 | 2.0E-06 |
| CD28        | CD28 molecule                                                                             | A_23_P91095      | 3.2                 | 3.6E-12 |
| C4orf7      | chromosome 4 open reading frame 7                                                         | A_23_P362694     | 3.2                 | 1.8E-05 |
| AMPD1       | adenosine monophosphate deaminase 1                                                       | A_23_P51787      | 3.1                 | 2.6E-05 |
| KIAA0125    | KIAA0125                                                                                  | A_24_P95723      | 3.0                 | 2.6E-05 |
| CD1A        | CD1a molecule                                                                             | A_23_P63167      | 3.0                 | 4.6E-08 |
| IGLL1       | immunoglobulin lambda-like polypeptide 1                                                  | A_24_P83102      | 2.8                 | 1.8E-07 |
| IGHV3-48    | immunoglobulin heavy variable 3-48                                                        | A_24_P204727     | 2.8                 | 1.8E-07 |
| DERL3       | Der1-like domain family, member 3                                                         | A_23_P6362       | 2.8                 | 1.4E-07 |
| CCR6        | chemokine (C-C motif) receptor 6                                                          | A_24_P234921     | 2.6                 | 1.7E-09 |
| JSRP1       | junctional sarcoplasmic reticulum protein 1                                               | A_23_P397320     | 2.6                 | 5.0E-06 |
| CKAP2       | cytoskeleton associated protein 2                                                         | A_23_P159435     | 2.6                 | 6.9E-05 |
| FCRL5       | Fc receptor-like 5                                                                        | A_23_P201211     | 2.6                 | 2.5E-06 |
| LOC642131   | putative V-set and immunoglobulin domain-containing protein 6-like                        | A_24_P750327     | 2.5                 | 7.4E-07 |
| SCFV        | single-chain Fv fragment                                                                  | A_24_P889462     | 2.5                 | 9.5E-07 |
| TNFRSF17    | tumor necrosis factor receptor superfamily, member 17                                     | A_23_P37736      | 2.4                 | 5.1E-05 |
| CXCR5       | chemokine (C-X-C motif) receptor 5                                                        | A_24_P252945     | 2.4                 | 2.5E-05 |
| TIGIT       | T cell immunoreceptor with Ig and ITIM domains                                            | A_23_P80528      | 2.4                 | 7.0E-09 |
| MS4A1       | membrane-spanning 4-domains, subfamily A, member 1                                        | A_23_P116371     | 2.4                 | 2.9E-05 |
| IGHG1       | immunoglobulin heavy constant gamma 1 (G1m marker)                                        | A_23_P390209     | 2.4                 | 5.7E-04 |
| IGKV1-5     | immunoglobulin kappa variable 1-5                                                         | A_32_P722809     | 2.4                 | 1.1E-05 |
| ANKRD30BP2  | ankyrin repeat domain 30B pseudogene 2                                                    | A_24_P917819     | 2.4                 | 2.7E-04 |
| IGLV6-57    | immunoglobulin lambda variable 6-57                                                       | A_24_P361816     | 2.3                 | 1.8E-06 |
| IGKC        | immunoglobulin kappa constant                                                             | A_24_P263786     | 2.3                 | 4.6E-04 |
| LTB         | lymphotoxin beta (TNF superfamily, member 3)                                              | A_23_P93348      | 2.3                 | 5.7E-09 |
| CD1C        | CD1c molecule                                                                             | A_23_P51767      | 2.3                 | 4.6E-08 |
| PNOC        | prepronociceptin                                                                          | A_23_P253321     | 2.2                 | 2.5E-06 |
| MZB1        | marginal zone B and B1 cell-specific protein                                              | A_23_P84596      | 2.1                 | 4.1E-06 |
| IGK@        | immunoglobulin kappa locus                                                                | A_24_P677559     | 2.1                 | 1.7E-07 |

|           |                                                                              |              |     |         |
|-----------|------------------------------------------------------------------------------|--------------|-----|---------|
| TLL3      | tubulin tyrosine ligase-like family, member 3                                | A_24_P917492 | 2.1 | 2.1E-06 |
| CD1E      | CD1e molecule                                                                | A_23_P201160 | 2.1 | 1.0E-04 |
| CD19      | CD19 molecule                                                                | A_23_P113572 | 2.1 | 2.2E-05 |
| IGHA1     | immunoglobulin heavy constant alpha 1                                        | A_24_P395415 | 2.1 | 8.2E-04 |
| SLC2A5    | solute carrier family 2 (facilitated glucose/fructose transporter), member 5 | A_23_P160159 | 2.1 | 2.6E-06 |
| PIM2      | pim-2 oncogene                                                               | A_24_P379104 | 2.0 | 1.3E-06 |
| IGKV2-24  | immunoglobulin kappa variable 2-24                                           | A_24_P306905 | 2.0 | 3.9E-06 |
| LOC96610  | BMS1 homolog, ribosome assembly protein (yeast) pseudogene                   | A_24_P93316  | 2.0 | 1.0E-05 |
| RASGRP1   | RAS guanyl releasing protein 1 (calcium and DAG-regulated)                   | A_23_P124642 | 2.0 | 7.7E-08 |
| IGKV1D-8  | immunoglobulin kappa variable 1D-8                                           | A_24_P93523  | 1.9 | 2.6E-05 |
| IRF4      | interferon regulatory factor 4                                               | A_23_P214360 | 1.8 | 1.0E-05 |
| GPR18     | G protein-coupled receptor 18                                                | A_23_P14165  | 1.8 | 2.7E-04 |
| COCH      | coagulation factor C homolog, cochlin (Limulus polyphemus)                   | A_24_P184799 | 1.8 | 1.8E-07 |
| SLAMF1    | signaling lymphocytic activation molecule family member 1                    | A_23_P62652  | 1.8 | 6.2E-06 |
| SIT1      | signaling threshold regulating transmembrane adaptor 1                       | A_23_P43369  | 1.8 | 1.8E-06 |
| CPNE5     | copine V                                                                     | A_23_P360804 | 1.7 | 2.3E-06 |
| BTLA      | B and T lymphocyte associated                                                | A_23_P80883  | 1.7 | 1.3E-04 |
| TRDV2     | T cell receptor delta variable 2                                             | A_23_P258504 | 1.7 | 1.4E-08 |
| FCRLA     | Fc receptor-like A                                                           | A_23_P46039  | 1.7 | 2.7E-04 |
| MGC16025  | hypothetical LOC85009                                                        | A_23_P79572  | 1.7 | 1.2E-05 |
| BLK       | B lymphoid tyrosine kinase                                                   | A_23_P31725  | 1.7 | 2.0E-03 |
| IGK@      | immunoglobulin kappa locus                                                   | A_24_P488083 | 1.6 | 1.4E-05 |
| ICOS      | inducible T-cell co-stimulator                                               | A_23_P371215 | 1.6 | 1.5E-06 |
| LAX1      | lymphocyte transmembrane adaptor 1                                           | A_24_P370952 | 1.6 | 3.6E-03 |
| LOC387895 | hypothetical LOC387895                                                       | A_32_P35047  | 1.6 | 9.2E-04 |
| CD27      | CD27 molecule                                                                | A_23_P48088  | 1.6 | 2.3E-06 |
| ZNF215    | zinc finger protein 215                                                      | A_23_P53057  | 1.6 | 9.6E-05 |
| AIM2      | absent in melanoma 2                                                         | A_32_P44394  | 1.5 | 1.0E-04 |
| CXCR3     | chemokine (C-X-C motif) receptor 3                                           | A_23_P114299 | 1.5 | 4.6E-08 |
| CD79A     | CD79a molecule, immunoglobulin-associated alpha                              | A_23_P107735 | 1.5 | 4.4E-04 |
| BFSP2     | beaded filament structural protein 2, phakinin                               | A_23_P159316 | 1.5 | 1.0E-05 |
| ZBP1      | Z-DNA binding protein 1                                                      | A_23_P259141 | 1.5 | 2.6E-05 |
| KRT81     | keratin 81                                                                   | A_23_P25187  | 1.5 | 1.4E-04 |
| FCRL2     | Fc receptor-like 2                                                           | A_23_P160751 | 1.5 | 2.6E-03 |
| IGLJ3     | immunoglobulin lambda joining 3                                              | A_24_P510357 | 1.5 | 4.4E-05 |
| MEI1      | meiosis inhibitor 1                                                          | A_23_P211561 | 1.5 | 1.1E-05 |
| SPIB      | Spi-B transcription factor (Spi-1/PU.1 related)                              | A_23_P39067  | 1.4 | 1.0E-05 |
| TCL1A     | T-cell leukemia/lymphoma 1A                                                  | A_23_P357717 | 1.4 | 1.8E-03 |
| PMCH      | pro-melanin-concentrating hormone                                            | A_23_P321223 | 1.4 | 3.4E-04 |

|            |                                                                                           |              |     |         |
|------------|-------------------------------------------------------------------------------------------|--------------|-----|---------|
| CD1B       | CD1b molecule                                                                             | A_23_P351844 | 1.4 | 9.3E-04 |
| NLRP7      | NLR family, pyrin domain containing 7                                                     | A_23_P16384  | 1.4 | 4.7E-05 |
| LMAN1      | lectin, mannose-binding, 1                                                                | A_23_P78342  | 1.4 | 3.5E-05 |
| RBP5       | retinol binding protein 5, cellular                                                       | A_24_P386746 | 1.3 | 3.0E-08 |
| LOR        | loricrin                                                                                  | A_23_P34452  | 1.3 | 1.0E-03 |
| LY9        | lymphocyte antigen 9                                                                      | A_24_P324674 | 1.3 | 2.0E-06 |
| PPIL4      | peptidylprolyl isomerase (cyclophilin)-like 4                                             | A_24_P187826 | 1.2 | 6.1E-04 |
| TRAF3IP3   | TRAF3 interacting protein 3                                                               | A_23_P334414 | 1.2 | 1.0E-04 |
| GZMK       | granzyme K (granzyme 3; tryptase II)                                                      | A_23_P156218 | 1.2 | 4.7E-05 |
| RHOH       | ras homolog gene family, member H                                                         | A_23_P58132  | 1.2 | 1.0E-05 |
| KCNN3      | potassium intermediate/small conductance calcium-activated channel, subfamily N, member 3 | A_23_P126167 | 1.2 | 6.9E-06 |
| PTPN7      | protein tyrosine phosphatase, non-receptor type 7                                         | A_23_P201778 | 1.2 | 5.4E-06 |
| CD79B      | CD79b molecule, immunoglobulin-associated beta                                            | A_23_P207201 | 1.2 | 2.1E-04 |
| ITM2C      | integral membrane protein 2C                                                              | A_24_P402690 | 1.2 | 4.8E-06 |
| STAMBPL1   | STAM binding protein-like 1                                                               | A_23_P385322 | 1.2 | 2.5E-06 |
| ANKRD36BP2 | ankyrin repeat domain 36B pseudogene 2                                                    | A_24_P341089 | 1.2 | 1.4E-04 |
| IL23A      | interleukin 23, alpha subunit p19                                                         | A_23_P76078  | 1.2 | 1.7E-06 |
| FKBP11     | FK506 binding protein 11, 19 kDa                                                          | A_23_P25121  | 1.2 | 9.2E-05 |
| S100B      | S100 calcium binding protein B                                                            | A_23_P143526 | 1.1 | 6.6E-04 |
| TNFRSF18   | tumor necrosis factor receptor superfamily, member 18                                     | A_24_P411121 | 1.1 | 2.0E-06 |
| FAM46C     | family with sequence similarity 46, member C                                              | A_23_P137751 | 1.1 | 1.6E-03 |
| KIAA1143   | KIAA1143                                                                                  | A_32_P11701  | 1.1 | 3.0E-04 |
| ACAP1      | ArfGAP with coiled-coil, ankyrin repeat and PH domains 1                                  | A_23_P107336 | 1.1 | 1.0E-04 |
| TP53INP1   | tumor protein p53 inducible nuclear protein 1                                             | A_23_P168882 | 1.1 | 3.5E-05 |
| PACSIN1    | protein kinase C and casein kinase substrate in neurons 1                                 | A_23_P258088 | 1.1 | 4.8E-05 |
| ASPHD2     | aspartate beta-hydroxylase domain containing 2                                            | A_24_P245815 | 1.1 | 1.8E-06 |
| PDK1       | pyruvate dehydrogenase kinase, isozyme 1                                                  | A_23_P10614  | 1.1 | 7.5E-04 |
| PRDM1      | PR domain containing 1, with ZNF domain                                                   | A_23_P350451 | 1.1 | 4.6E-03 |
| LSP1       | lymphocyte-specific protein 1                                                             | A_23_P13382  | 1.0 | 2.7E-05 |
| TLR10      | toll-like receptor 10                                                                     | A_23_P33420  | 1.0 | 1.8E-03 |
| SPAG4      | sperm associated antigen 4                                                                | A_23_P132027 | 1.0 | 9.3E-04 |
| HSH2D      | hematopoietic SH2 domain containing                                                       | A_23_P153372 | 1.0 | 1.0E-04 |
| CATSPERB   | cation channel, sperm-associated, beta                                                    | A_23_P77043  | 1.0 | 1.2E-02 |
| P2RY8      | purinergic receptor P2Y, G-protein coupled, 8                                             | A_24_P340128 | 1.0 | 9.5E-04 |
| CR2        | complement component (3d/Epstein Barr virus) receptor 2                                   | A_23_P124542 | 1.0 | 8.2E-03 |
|            |                                                                                           | A_32_P145010 | 1.0 | 1.0E-05 |
| BLNK       | B-cell linker                                                                             | A_24_P64344  | 0.9 | 2.1E-04 |
| CLDN14     | claudin 14                                                                                | A_23_P91512  | 0.9 | 2.3E-03 |
| EMB        | embigin                                                                                   | A_24_P684186 | 0.9 | 2.5E-06 |

|          |                                                                                         |              |     |         |
|----------|-----------------------------------------------------------------------------------------|--------------|-----|---------|
| EMBP1    | embigin pseudogene 1                                                                    | A_32_P206541 | 0.9 | 4.8E-06 |
| RAB33A   | RAB33A, member RAS oncogene family                                                      | A_23_P147025 | 0.9 | 1.1E-05 |
| SMR3A    | submaxillary gland androgen regulated protein 3A                                        | A_23_P41365  | 0.9 | 9.6E-03 |
| FAM129C  | family with sequence similarity 129, member C                                           | A_24_P940348 | 0.9 | 3.7E-03 |
| TSPEAR   | thrombospondin-type laminin G domain and EAR repeats                                    | A_23_P394972 | 0.9 | 5.9E-04 |
| SUSD3    | sushi domain containing 3                                                               | A_23_P401076 | 0.9 | 7.0E-05 |
| ADAD1    | adenosine deaminase domain containing 1 (testis-specific)                               | A_23_P41514  | 0.9 | 4.1E-03 |
| DOCK10   | dedicator of cytokinesis 10                                                             | A_24_P391811 | 0.8 | 7.1E-03 |
| GPR114   | G protein-coupled receptor 114                                                          | A_23_P206290 | 0.8 | 1.5E-04 |
| DCX      | doublecortin                                                                            | A_23_P500328 | 0.8 | 5.1E-03 |
| ZNF80    | zinc finger protein 80                                                                  | A_23_P256526 | 0.8 | 5.2E-04 |
| SEC11C   | SEC11 homolog C ( <i>S. cerevisiae</i> )                                                | A_23_P208009 | 0.8 | 3.3E-04 |
| RAB30    | RAB30, member RAS oncogene family                                                       | A_24_P167338 | 0.8 | 1.5E-02 |
| IGHM     | immunoglobulin heavy constant mu                                                        | A_24_P417352 | 0.8 | 1.4E-04 |
| C12orf42 | chromosome 12 open reading frame 42                                                     | A_32_P133767 | 0.8 | 1.4E-03 |
| TCF7     | transcription factor 7 (T-cell specific, HMG-box)                                       | A_23_P7582   | 0.8 | 5.8E-05 |
| DEF6     | differentially expressed in FDCP 6 homolog (mouse)                                      | A_23_P321913 | 0.8 | 3.7E-05 |
| STARD5   | StAR-related lipid transfer (START) domain containing 5                                 | A_23_P158880 | 0.8 | 1.1E-04 |
| LIMD2    | LIM domain containing 2                                                                 | A_23_P26824  | 0.7 | 5.5E-04 |
| CYSLTR1  | cysteinyl leukotriene receptor 1                                                        | A_23_P22660  | 0.7 | 9.9E-06 |
| RAC2     | ras-related C3 botulinum toxin substrate 2 (rho family, small GTP binding protein Rac2) | A_23_P218774 | 0.7 | 1.0E-03 |
| SSR4     | signal sequence receptor, delta                                                         | A_23_P259172 | 0.7 | 1.6E-03 |
| ERO1LB   | ERO1-like beta ( <i>S. cerevisiae</i> )                                                 | A_23_P347618 | 0.7 | 3.0E-03 |
| ZNF141   | zinc finger protein 141                                                                 | A_23_P388867 | 0.7 | 3.7E-03 |
| N4BP2L1  | NEDD4 binding protein 2-like 1                                                          | A_23_P88067  | 0.7 | 1.2E-02 |
| C3orf51  | chromosome 3 open reading frame 51                                                      | A_23_P18053  | 0.7 | 5.5E-03 |
| PIK3CG   | phosphoinositide-3-kinase, catalytic, gamma polypeptide                                 | A_23_P251359 | 0.6 | 1.0E-02 |
| VPREB3   | pre-B lymphocyte 3                                                                      | A_23_P166371 | 0.6 | 3.9E-03 |
| FAIM3    | Fas apoptotic inhibitory molecule 3                                                     | A_23_P138125 | 0.6 | 1.9E-04 |
| HSPA13   | heat shock protein 70kDa family, member 13                                              | A_23_P17606  | 0.6 | 1.2E-02 |
| PTPRCAP  | protein tyrosine phosphatase, receptor type, C-associated protein                       | A_23_P98173  | 0.6 | 6.0E-04 |
| CREB3L2  | cAMP responsive element binding protein 3-like 2                                        | A_24_P180654 | 0.6 | 1.5E-03 |
| DENND5B  | DENN/MADD domain containing 5B                                                          | A_23_P366559 | 0.6 | 1.1E-02 |
| HSP90B1  | heat shock protein 90kDa beta (Grp94), member 1                                         | A_32_P67680  | 0.6 | 3.9E-03 |

## **SUPPLEMENTARY FIGURE LEGENDS**

**Supplementary Figure 1.** Pathological characterization of adjacent sections in areas of bronchiolization (A-D) and lymphoid aggregates (E-H) in IPF lung tissue.

A) A honeycombed cyst is lined with columnar epithelial cells (H&E stain). B) Collagen deposition (blue) is minimal within the bronchiolized region (Masson's trichrome stain). C) The epithelial cells lining the cyst stain strongly for keratin 14 (anti-K14 stain). D) The epithelial cells lining the cyst express mucins (PAS stain). E) Multiple aggregates of cells with darkly staining nuclei (H&E). F) Collagen deposition (blue) surrounds but is not present within the cellular aggregates (trichrome). G) The aggregates have large concentrations of CD20+ B cells (anti-CD20 stain). H) Higher magnification of aggregate indicated with dashed box in (G).

**Supplementary Figure 2.** Concordance between microarray and qPCR-determined gene signatures. RNA samples used in microarray experiments described in Figure 1 were assessed by qPCR for gene expression as specified in Supplementary table 2 (N=17 IPF, 5 control) for A) bronchiolar and B) lymphoid signatures.

**Supplementary Figure 3.** Representative tissue sections for histological scoring of bronchiolization (A-D) and lymphoid aggregates (E-F). A) bronchiolar score 0, B) 1, C) 2, D) 3. E) Lymphoid score 0, F) 1, G) 2, H) 3.

Supplementary Figure 1

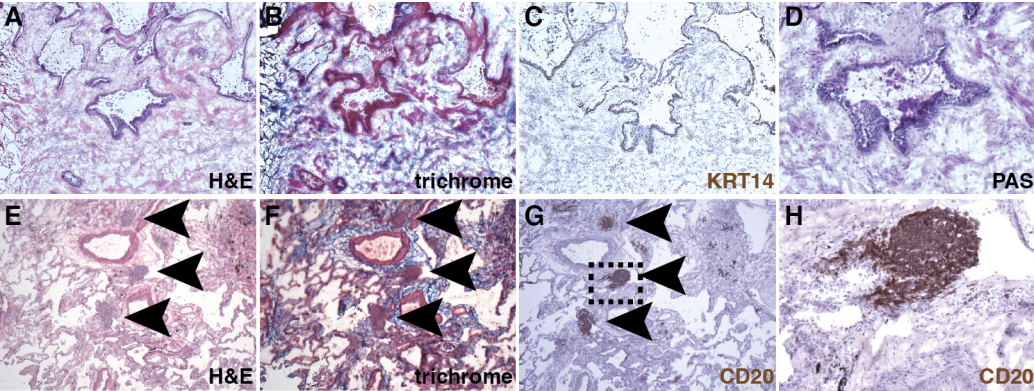



Supplementary Figure 3

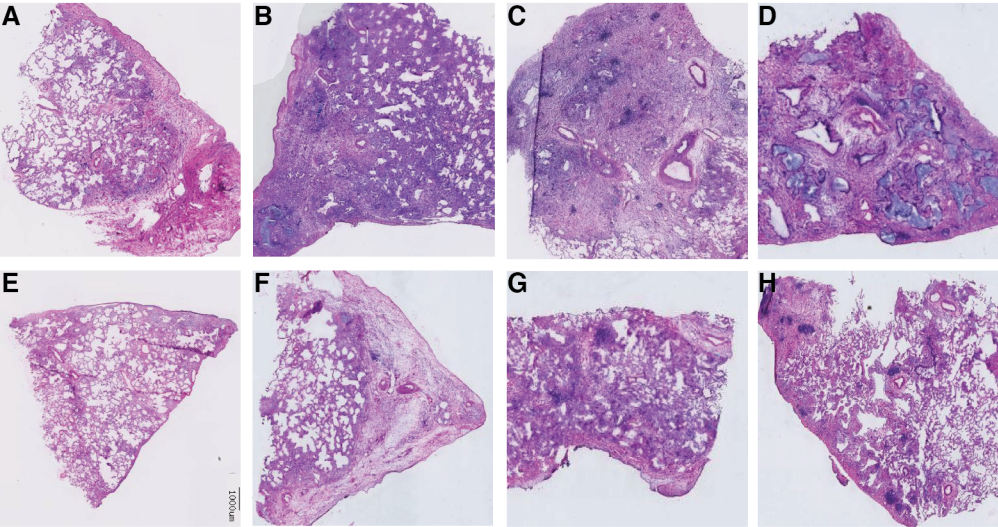

Supplement: NIHMS697296-supplement-Supplement.pdf [file NIHMS697296-supplement-Supplement.pdf]
